# Supplementary material for: Phenotype and Neuronal Cytotoxic Function of Glioblastoma Extracellular Vesicles
Source: MDPI journal article supplement (doi:10.3390/biomedicines10112718), 2022-10-27
Supplement: s1 [file s1]

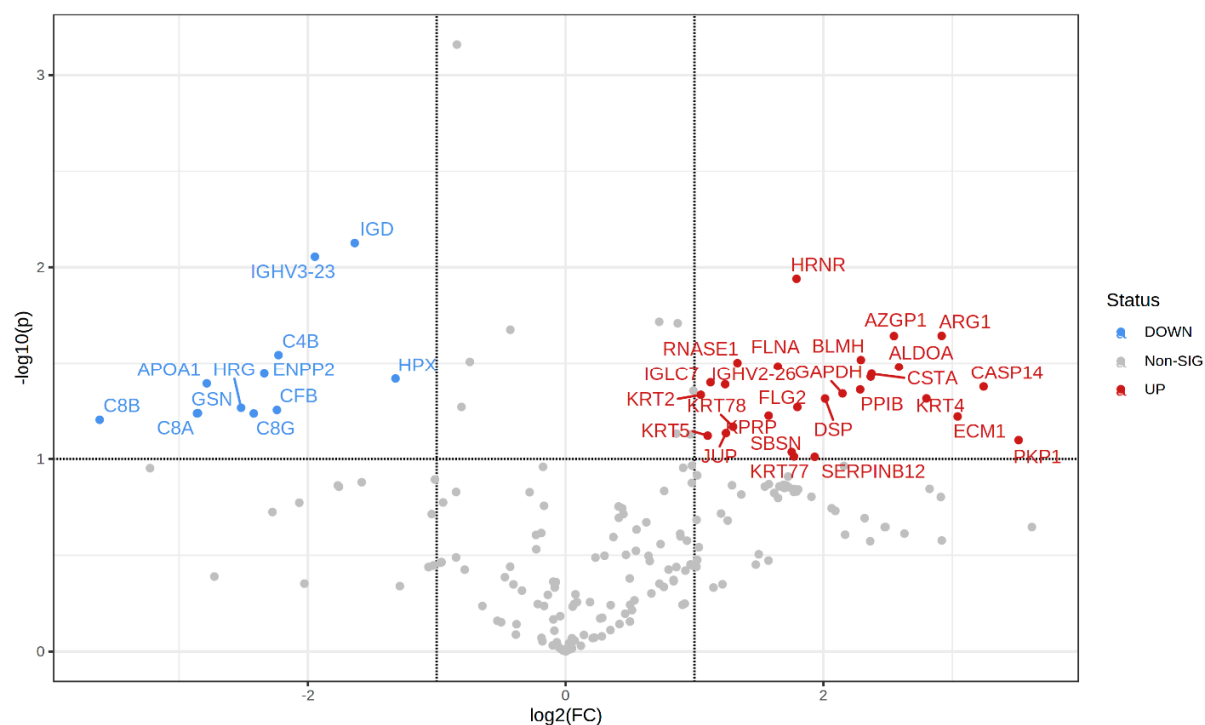

**Figure S1. Volcano plot of GBM vs HC purified IgG proteomics.** Up: proteins that are increased in GBM purified IgG vs HC purified IgG, Down: proteins that are decreased in GBM purified IgG vs HC purified IgG, Non-sig: proteins that not significantly changed between GBM and HC purified IgG

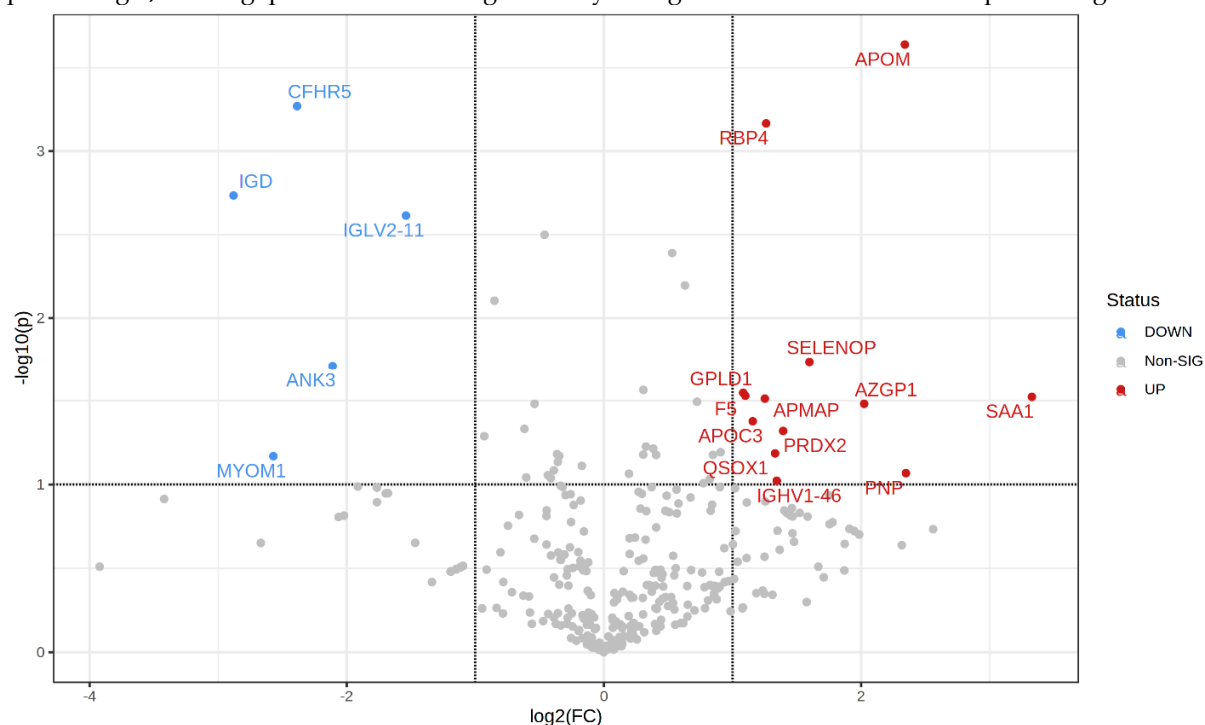

**Figure S2. Volcano plot of GBM vs HC EV proteomics.** Up: proteins that are increased in GBM EV vs HC EV, Down: proteins that are decreased in GBM EV vs HC EV, Non-sig: proteins that not significantly changed between GBM and HC EV.
