# Supplementary material for: Phenotype and Neuronal Cytotoxic Function of Glioblastoma Extracellular Vesicles
Source: MDPI journal article supplement (doi:10.3390/biomedicines10112718), 2022-10-27
Supplement: s1 [file s1]

**Table S1.** Patient Demographics.

|                            | GBM                           | MMA                        | Controls                                         |
|----------------------------|-------------------------------|----------------------------|--------------------------------------------------|
| Subject (n)                | 82                            | 83                         | 50                                               |
| Male (n)                   | 55                            | 26                         | 23                                               |
| Female (n)                 | 27                            | 57                         | 27                                               |
| Age (years, mean $\pm$ SD) | 60.4 $\pm$ 11.3               | 56.9 $\pm$ 12.0            | 45.1 $\pm$ 13.1                                  |
| Diagnostic                 | Glioblastoma,<br>WHO grade IV | Meningioma,<br>WHO grade I | Healthy Controls<br>(10M/18F)<br>Other non-tumor |
