# Supplementary material for: Phenotype and Neuronal Cytotoxic Function of Glioblastoma Extracellular Vesicles
Source: Biomedicines. 2022 Oct 27;10(11):2718. doi: 10.3390/biomedicines10112718 (PMC9688005; doi:10.3390/biomedicines10112718)
Supplement: Supplementary file 1 [file biomedicines-10-02718-s001.zip]

Archive with 6 entries (6 files):
- biomedicines-1930407 Supplementary Figures.pdf
- biomedicines-1930407 Table S1 Patient Demographics.pdf
- biomedicines-1930407 Table S2 Protein concentrations for MS.xlsx
- biomedicines-1930407 Table S3 MS proteomic results all EVs.xls.xlsx
- biomedicines-1930407 Table S4 MS proteomic results purified IgG.xls.xlsx
- biomedicines-1930407 Table S5 IPA comparison analysis all 4 EV samples full table.xls
