# Supplementary material for: Phenotype and Neuronal Cytotoxic Function of Glioblastoma Extracellular Vesicles
Source: Biomedicines. 2022 Oct 27;10(11):2718. doi: 10.3390/biomedicines10112718 (PMC9688005; doi:10.3390/biomedicines10112718)
Supplement: Supplementary file 1 [file biomedicines-10-02718-s001.zip › biomedicines-1930407 Table S2 Protein concentrations for MS.xlsx]

## Sheet: Sheet1
		Table S2. Protein Samples Sent for Mass Spectrometry
	Sample ID	Description (Melon spin column purified IgG)	Conc (ug/ul)	Vol (ul)
	HC-036	Health control plasma IgG	0.779425	30
	HC-035	Health control plasma IgG	0.814325	30
	HC-039	Health control plasma IgG	1.06584	30
	M-29 HC	Health control plasma IgG	1.77511	30
	GBM L14-2	Glioblastoma patient plasma IgG	0.643859	30
	GBM L14-5	Glioblastoma patient plasma IgG	0.643859	30
	GBM L14-6	Glioblastoma patient plasma IgG	1.67115	30
	GBM L14-7	Glioblastoma patient plasma IgG	0.58005	30
	MMA L7-1	Meningioma patient plasma IgG	1.89376	30
	MMA L7-7	Meningioma patient plasma IgG	0.894092	30
	MMA L8-4	Meningioma patient plasma IgG	1.12278	30
	MMA L10-1	Meningioma patient plasma IgG	1.29433	30
	Met-1	Metastasis patient plasma IgG	0.79	30
	Met-2	Metastasis patient plasma IgG	0.85	30
	Met-3	Metastasis patient plasma IgG	0.68	30
	Met-4	Metastasis patient plasma IgG	0.93	30
	Sample ID	Description (SBI ExoQuick purified EV)	Conc (ug/ul)	Vol (ul)
	HC-036	Health control plasma purified EV	30.962	10
	HC-035	Health control plasma purified EV	31.958	10
	HC-039	Health control plasma purified EV	30.338	10
	M-29 HC	Health control plasma purified EV	32.898	10
	GBM L14-2	Glioblastoma patient plasma purified EV	21.196	10
	GBM L14-5	Glioblastoma patient plasma purified EV	24.62	10
	GBM L14-6	Glioblastoma patient plasma purified EV	27.432	10
	GBM L14-7	Glioblastoma patient plasma purified EV	16.898	10
	MMA L7-1	Meningioma patient plasma purified EV	30.188	10
	MMA L7-7	Meningioma patient plasma purified EV	21.668	10
	MMA L8-4	Meningioma patient plasma purified EV	27.6782	10
	MMA L10-1	Meningioma patient plasma purified EV	30.18	10
	Met K15-6	Metastasis patient plasma purified EV	27.4127	10
	Met K18-3	Metastasis patient plasma purified EV	26.3055	10
	Met K18-5	Metastasis patient plasma purified EV	34.5018	10
	Met K20-9	Metastasis patient plasma purified EV	30.1473	10

## Sheet: Sheet2
		HC	GBM	MMA	Met
		0.779425	0.643859	1.89376	0.79
		0.814325	0.643859	0.894092	0.85
		1.06584	1.67115	1.12278	0.68
		1.77511	0.58005	1.29433	0.93
