# Supplementary material for: Phenotype and Neuronal Cytotoxic Function of Glioblastoma Extracellular Vesicles
Source: Biomedicines. 2022 Oct 27;10(11):2718. doi: 10.3390/biomedicines10112718 (PMC9688005; doi:10.3390/biomedicines10112718)
Supplement: Supplementary file 1 [file biomedicines-10-02718-s001.zip › biomedicines-1930407 Table S3 MS proteomic results all EVs.xls.xlsx]

## Sheet: Samples Report for result 20210
result 20210823, Samples report created on 08/23/2021
Experiment: result 20210823
Protein Grouping Strategy: Experiment-wide grouping with binary peptide-protein weights
Peptide Thresholds: 95.0% minimum
Protein Thresholds: 99.0% minimum and 1 peptide minimum
Peptide FDR: 0.3% (Prophet)
Protein FDR: 0.2% (Prophet)
GO Annotation Source(s):
Pathway Annotation Source(s):
Alternate ID Source(s): FASTA:UniProt/Swiss-Prot (UniProtKB)
	Table S3: Proteomic results of EV samples
result 20210823
						GBM	GBM	GBM	GBM	HC	HC	HC	HC	MMA	MMA	MMA	MMA	Met	Met	Met	Met
#	Identified Proteins (563)	Accession Number	Alternate ID	Molecular Weight	Taxonomy	GBM L14-7	GBM L14-6	GBM L14-5	GBM L14-2	M-29 HC	HC-039	HC-036	HC-035	MMA L8-4	MMA L7-7	MMA L7-1	MMA L10-1	Met K18-5	Met K18-3	Met K15-6	Met K20-9
1	Serum albumin OS=Homo sapiens OX=9606 GN=ALB PE=1 SV=2	ALBU_HUMAN	ALB	69 kDa	Homo sapiens	6726	6546	7496	7532	7339	8483	6864	7535	5866	6592	6439	6703	7055	6259	6347	7337
2	Complement C3 OS=Homo sapiens OX=9606 GN=C3 PE=1 SV=2	CO3_HUMAN	C3	187 kDa	Homo sapiens	2915	2131	2756	2862	2119	2215	2282	2436	2565	2335	3180	2651	3331	2205	2700	3040
3	Alpha-2-macroglobulin OS=Homo sapiens OX=9606 GN=A2M PE=1 SV=3	A2MG_HUMAN	A2M	163 kDa	Homo sapiens	2172	4134	2443	2486	2208	1696	2023	2203	2068	2395	1867	1598	1985	1903	2251	1826
4	Apolipoprotein B-100 OS=Homo sapiens OX=9606 GN=APOB PE=1 SV=2	APOB_HUMAN	APOB	516 kDa	Homo sapiens	2027	2090	2494	2793	2153	1794	1465	1843	2509	1764	2375	1845	2139	2363	2419	1953
5	Immunoglobulin gamma-1 heavy chain OS=Homo sapiens OX=9606 PE=1 SV=2	IGG1_HUMAN	IGG1	49 kDa	Homo sapiens	1304	2431	1622	1787	2267	1791	2372	1896	1884	1549	2517	1804	1515	1678	1187	1605
6	Fibrinogen beta chain OS=Homo sapiens OX=9606 GN=FGB PE=1 SV=2	FIBB_HUMAN	FGB	56 kDa	Homo sapiens	2487	1390	858	1185	1686	42	1605	768	2703	2424	1033	1956	2086	2240	2290	828
7	Serotransferrin OS=Homo sapiens OX=9606 GN=TF PE=1 SV=3	TRFE_HUMAN	TF	77 kDa	Homo sapiens	1260	1104	1547	1378	1143	1526	1162	1212	981	1175	960	1081	1251	918	1051	1023
8	Fibrinogen alpha chain OS=Homo sapiens OX=9606 GN=FGA PE=1 SV=2	FIBA_HUMAN	FGA	95 kDa	Homo sapiens	1593	776	600	648	1090	49	990	435	1656	1475	636	1023	1368	1312	1392	514
9	Immunoglobulin kappa constant OS=Homo sapiens OX=9606 GN=IGKC PE=1 SV=2	IGKC_HUMAN	IGKC	12 kDa	Homo sapiens	984	1466	884	973	1159	1028	1085	970	1023	1066	1074	950	893	887	874	904
10	Fibrinogen gamma chain OS=Homo sapiens OX=9606 GN=FGG PE=1 SV=3	FIBG_HUMAN	FGG	52 kDa	Homo sapiens	1350	823	553	703	965	45	1020	557	1695	1252	677	1068	1101	1192	1335	549
11	Alpha-1-antitrypsin OS=Homo sapiens OX=9606 GN=SERPINA1 PE=1 SV=3	A1AT_HUMAN	SERPINA1	47 kDa	Homo sapiens	709	816	889	553	957	1183	708	804	827	1254	1100	872	674	716	605	473
12	Complement C4-B OS=Homo sapiens OX=9606 GN=C4B PE=1 SV=2	CO4B_HUMAN	C4B	193 kDa	Homo sapiens	1001	800	810	799	806	778	969	824	889	928	882	883	1042	852	1006	1060
13	Immunoglobulin heavy constant gamma 2 OS=Homo sapiens OX=9606 GN=IGHG2 PE=1 SV=2	IGHG2_HUMAN	IGHG2	36 kDa	Homo sapiens	971	1287	701	1011	1213	846	1043	988	813	895	1339	811	716	611	732	842
14	Immunoglobulin heavy constant mu OS=Homo sapiens OX=9606 GN=IGHM PE=1 SV=4	IGHM_HUMAN	IGHM	49 kDa	Homo sapiens	467	1212	598	522	477	456	550	435	664	288	358	585	346	364	294	243
15	Complement factor H OS=Homo sapiens OX=9606 GN=CFH PE=1 SV=4	CFAH_HUMAN	CFH	139 kDa	Homo sapiens	458	388	359	498	379	406	427	446	441	479	539	522	474	398	400	500
16	Ceruloplasmin OS=Homo sapiens OX=9606 GN=CP PE=1 SV=1	CERU_HUMAN	CP	122 kDa	Homo sapiens	452	414	563	502	377	370	352	362	387	500	491	450	583	437	436	404
17	Immunoglobulin heavy constant gamma 3 OS=Homo sapiens OX=9606 GN=IGHG3 PE=1 SV=2	IGHG3_HUMAN	IGHG3	41 kDa	Homo sapiens	634	987	578	707	679	598	790	679	757	685	978	582	746	717	589	653
18	Plasminogen OS=Homo sapiens OX=9606 GN=PLG PE=1 SV=2	PLMN_HUMAN	PLG	91 kDa	Homo sapiens	433	311	428	416	353	356	364	341	410	338	370	362	339	322	382	366
19	Apolipoprotein A-I OS=Homo sapiens OX=9606 GN=APOA1 PE=1 SV=1	APOA1_HUMAN	APOA1	31 kDa	Homo sapiens	432	468	608	421	329	372	359	299	295	461	364	252	290	365	385	261
20	Inter-alpha-trypsin inhibitor heavy chain H1 OS=Homo sapiens OX=9606 GN=ITIH1 PE=1 SV=3	ITIH1_HUMAN	ITIH1	101 kDa	Homo sapiens	461	346	336	439	313	345	350	361	376	354	353	358	283	370	423	389
21	Haptoglobin OS=Homo sapiens OX=9606 GN=HP PE=1 SV=1	HPT_HUMAN	HP	45 kDa	Homo sapiens	340	253	438	250	317	291	173	290	388	423	487	207	566	395	331	289
22	Fibronectin OS=Homo sapiens OX=9606 GN=FN1 PE=1 SV=4	FINC_HUMAN	FN1	263 kDa	Homo sapiens	184	189	109	451	386	294	451	488	409	286	324	169	237	327	403	374
23	C4b-binding protein alpha chain OS=Homo sapiens OX=9606 GN=C4BPA PE=1 SV=2	C4BPA_HUMAN	C4BPA	67 kDa	Homo sapiens	351	233	309	262	291	262	339	288	555	361	228	316	372	340	349	290
24	Complement C5 OS=Homo sapiens OX=9606 GN=C5 PE=1 SV=4	CO5_HUMAN	C5	188 kDa	Homo sapiens	421	302	315	301	259	240	289	274	377	346	400	317	402	330	395	325
25	Immunoglobulin heavy constant alpha 1 OS=Homo sapiens OX=9606 GN=IGHA1 PE=1 SV=2	IGHA1_HUMAN	IGHA1	38 kDa	Homo sapiens	261	559	288	237	336	304	274	332	362	318	188	206	208	199	274	243
26	Inter-alpha-trypsin inhibitor heavy chain H4 OS=Homo sapiens OX=9606 GN=ITIH4 PE=1 SV=4	ITIH4_HUMAN	ITIH4	103 kDa	Homo sapiens	381	242	390	325	279	216	227	254	277	361	296	328	315	294	336	328
27	Antithrombin-III OS=Homo sapiens OX=9606 GN=SERPINC1 PE=1 SV=1	ANT3_HUMAN	SERPINC1	53 kDa	Homo sapiens	347	277	285	325	295	324	315	314	322	348	336	319	283	297	289	276
28	Transthyretin OS=Homo sapiens OX=9606 GN=TTR PE=1 SV=1	TTHY_HUMAN	TTR	16 kDa	Homo sapiens	382	247	369	455	232	274	166	268	206	249	239	224	168	385	263	309
29	Inter-alpha-trypsin inhibitor heavy chain H2 OS=Homo sapiens OX=9606 GN=ITIH2 PE=1 SV=2	ITIH2_HUMAN	ITIH2	106 kDa	Homo sapiens	312	268	277	377	231	255	269	253	263	238	252	220	155	274	279	266
30	Complement factor B OS=Homo sapiens OX=9606 GN=CFB PE=1 SV=2	CFAB_HUMAN	CFB	86 kDa	Homo sapiens	195	141	201	184	208	203	205	172	178	221	216	196	272	131	147	240
31	Immunoglobulin lambda constant 2 OS=Homo sapiens OX=9606 GN=IGLC2 PE=1 SV=1	IGLC2_HUMAN	IGLC2	11 kDa	Homo sapiens	190	247	205	131	236	195	195	212	222	195	251	136	172	180	168	138
32	Hemopexin OS=Homo sapiens OX=9606 GN=HPX PE=1 SV=2	HEMO_HUMAN	HPX	52 kDa	Homo sapiens	232	227	246	211	154	150	118	154	135	182	208	152	176	144	193	184
33	Prothrombin OS=Homo sapiens OX=9606 GN=F2 PE=1 SV=2	THRB_HUMAN	F2	70 kDa	Homo sapiens	234	182	285	243	206	202	183	188	222	218	229	205	216	210	241	219
34	Alpha-1-antichymotrypsin OS=Homo sapiens OX=9606 GN=SERPINA3 PE=1 SV=2	AACT_HUMAN	SERPINA3	48 kDa	Homo sapiens	243	173	201	213	146	161	147	147	182	176	225	198	221	223	253	180
35	Hemoglobin subunit alpha OS=Homo sapiens OX=9606 GN=HBA1 PE=1 SV=2	HBA_HUMAN	HBA1	15 kDa	Homo sapiens	173	148	312	169	189	62	165	139	122	151	139	166	279	446	246	195
36	Immunoglobulin heavy constant gamma 4 OS=Homo sapiens OX=9606 GN=IGHG4 PE=1 SV=1	IGHG4_HUMAN	IGHG4	36 kDa	Homo sapiens	398	599	362	427	498	398	685	578	481	540	1111	488	391	380	364	371
37	Retinol-binding protein 4 OS=Homo sapiens OX=9606 GN=RBP4 PE=1 SV=3	RET4_HUMAN	RBP4	23 kDa	Homo sapiens	244	181	199	229	96	73	54	101	110	129	90	83	93	333	146	178
38	Beta-2-glycoprotein 1 OS=Homo sapiens OX=9606 GN=APOH PE=1 SV=3	APOH_HUMAN	APOH	38 kDa	Homo sapiens	156	133	122	150	117	114	108	106	105	133	117	114	104	156	134	117
39	Gelsolin OS=Homo sapiens OX=9606 GN=GSN PE=1 SV=1	GELS_HUMAN	GSN	86 kDa	Homo sapiens	76	134	112	134	138	169	162	131	108	116	90	144	87	161	131	128
40	Complement C1r subcomponent OS=Homo sapiens OX=9606 GN=C1R PE=1 SV=2	C1R_HUMAN	C1R	80 kDa	Homo sapiens	129	109	108	136	111	142	157	146	124	127	143	119	157	140	129	131
41	Hemoglobin subunit beta OS=Homo sapiens OX=9606 GN=HBB PE=1 SV=2	HBB_HUMAN	HBB	16 kDa	Homo sapiens	126	121	196	116	124	36	139	96	99	124	116	105	180	272	179	121
42	Complement component C8 beta chain OS=Homo sapiens OX=9606 GN=C8B PE=1 SV=3	CO8B_HUMAN	C8B	67 kDa	Homo sapiens	120	121	105	118	118	106	141	111	115	126	131	140	100	100	103	128
43	Heparin cofactor 2 OS=Homo sapiens OX=9606 GN=SERPIND1 PE=1 SV=3	HEP2_HUMAN	SERPIND1	57 kDa	Homo sapiens	133	84	131	97	99	111	94	95	102	120	95	148	129	108	131	121
44	Complement component C9 OS=Homo sapiens OX=9606 GN=C9 PE=1 SV=2	CO9_HUMAN	C9	63 kDa	Homo sapiens	129	115	68	107	106	87	90	79	109	137	134	133	147	94	109	113
45	Apolipoprotein A-IV OS=Homo sapiens OX=9606 GN=APOA4 PE=1 SV=3	APOA4_HUMAN	APOA4	45 kDa	Homo sapiens	64	100	142	83	96	125	118	94	90	121	116	89	50	108	78	68
46	Keratin, type II cytoskeletal 1 OS=Homo sapiens OX=9606 GN=KRT1 PE=1 SV=6	K2C1_HUMAN	KRT1	66 kDa	Homo sapiens	119	108	95	100	86	77	105	95	119	91	72	74	86	101	134	93
47	Protein AMBP OS=Homo sapiens OX=9606 GN=AMBP PE=1 SV=1	AMBP_HUMAN	AMBP	39 kDa	Homo sapiens	103	121	72	99	74	101	71	86	96	134	86	83	74	166	103	84
48	Complement C1q subcomponent subunit A OS=Homo sapiens OX=9606 GN=C1QA PE=1 SV=2	C1QA_HUMAN	C1QA	26 kDa	Homo sapiens	90	99	74	90	117	53	116	97	149	100	83	111	107	139	86	85
49	Apolipoprotein E OS=Homo sapiens OX=9606 GN=APOE PE=1 SV=1	APOE_HUMAN	APOE	36 kDa	Homo sapiens	105	108	113	103	80	59	103	76	111	98	121	71	84	127	134	113
50	Vitamin K-dependent protein S OS=Homo sapiens OX=9606 GN=PROS1 PE=1 SV=1	PROS_HUMAN	PROS1	75 kDa	Homo sapiens	94	62	70	80	77	62	95	85	161	90	68	99	89	122	97	71
51	Alpha-1B-glycoprotein OS=Homo sapiens OX=9606 GN=A1BG PE=1 SV=4	A1BG_HUMAN	A1BG	54 kDa	Homo sapiens	114	78	150	99	61	80	78	70	59	76	100	74	81	72	89	86
52	Angiotensinogen OS=Homo sapiens OX=9606 GN=AGT PE=1 SV=1	ANGT_HUMAN	AGT	53 kDa	Homo sapiens	115	79	158	119	77	117	88	84	98	101	92	83	111	98	112	74
53	Complement C1s subcomponent OS=Homo sapiens OX=9606 GN=C1S PE=1 SV=1	C1S_HUMAN	C1S	77 kDa	Homo sapiens	81	94	60	71	60	98	110	67	80	89	115	75	90	79	77	76
54	Plasma protease C1 inhibitor OS=Homo sapiens OX=9606 GN=SERPING1 PE=1 SV=2	IC1_HUMAN	SERPING1	55 kDa	Homo sapiens	90	66	77	70	85	102	88	79	97	96	110	86	77	63	84	89
55	Alpha-2-HS-glycoprotein OS=Homo sapiens OX=9606 GN=AHSG PE=1 SV=2	FETUA_HUMAN	AHSG	39 kDa	Homo sapiens	52	38	39	59	70	81	65	91	50	58	56	78	64	46	37	112
56	Histidine-rich glycoprotein OS=Homo sapiens OX=9606 GN=HRG PE=1 SV=1	HRG_HUMAN	HRG	60 kDa	Homo sapiens	86	87	61	68	79	73	77	81	74	124	88	81	77	78	78	112
57	Vitamin D-binding protein OS=Homo sapiens OX=9606 GN=GC PE=1 SV=2	VTDB_HUMAN	GC	53 kDa	Homo sapiens	133	67	129	128	80	113	83	82	49	72	70	70	70	65	57	46
58	Kininogen-1 OS=Homo sapiens OX=9606 GN=KNG1 PE=1 SV=2	KNG1_HUMAN	KNG1	72 kDa	Homo sapiens	98	71	97	71	65	59	68	61	66	77	91	85	81	71	87	84
59	Complement component C6 OS=Homo sapiens OX=9606 GN=C6 PE=1 SV=3	CO6_HUMAN	C6	105 kDa	Homo sapiens	83	61	64	85	62	68	79	57	88	88	82	100	76	70	83	82
60	Complement component C7 OS=Homo sapiens OX=9606 GN=C7 PE=1 SV=2	CO7_HUMAN	C7	94 kDa	Homo sapiens	102	102	43	122	48	62	62	50	91	70	94	67	87	63	77	81
61	Alpha-2-antiplasmin OS=Homo sapiens OX=9606 GN=SERPINF2 PE=1 SV=3	A2AP_HUMAN	SERPINF2	55 kDa	Homo sapiens	92	51	94	93	92	97	86	87	84	85	70	81	77	72	72	92
62	Complement component C8 alpha chain OS=Homo sapiens OX=9606 GN=C8A PE=1 SV=2	CO8A_HUMAN	C8A	65 kDa	Homo sapiens	79	82	61	80	69	59	77	71	78	53	73	95	91	68	70	94
63	Keratin, type I cytoskeletal 9 OS=Homo sapiens OX=9606 GN=KRT9 PE=1 SV=3	K1C9_HUMAN	KRT9	62 kDa	Homo sapiens	97	46	50	86	53	44	86	77	109	61	58	68	72	76	90	61
64	Clusterin OS=Homo sapiens OX=9606 GN=CLU PE=1 SV=1	CLUS_HUMAN	CLU	52 kDa	Homo sapiens	87	84	79	85	79	57	53	58	60	65	87	60	60	69	66	89
65	CD5 antigen-like OS=Homo sapiens OX=9606 GN=CD5L PE=1 SV=1	CD5L_HUMAN	CD5L	38 kDa	Homo sapiens	58	143	54	86	62	79	82	68	97	39	59	117	52	61	49	40
66	Immunoglobulin kappa variable 3D-20 OS=Homo sapiens OX=9606 GN=IGKV3D-20 PE=3 SV=1	KVD20_HUMAN	IGKV3D-20	13 kDa	Homo sapiens	29	123	46	116	102	68	99	103	64	70	127	55	0	49	28	101
67	N-acetylmuramoyl-L-alanine amidase OS=Homo sapiens OX=9606 GN=PGLYRP2 PE=1 SV=1	PGRP2_HUMAN	PGLYRP2	62 kDa	Homo sapiens	72	77	61	93	59	76	84	74	82	82	64	67	52	57	82	76
68	Serum paraoxonase/arylesterase 1 OS=Homo sapiens OX=9606 GN=PON1 PE=1 SV=3	PON1_HUMAN	PON1	40 kDa	Homo sapiens	77	66	99	103	52	68	64	89	80	42	58	38	51	77	81	51
69	Complement C1q subcomponent subunit C OS=Homo sapiens OX=9606 GN=C1QC PE=1 SV=3	C1QC_HUMAN	C1QC	26 kDa	Homo sapiens	31	37	26	65	56	30	60	48	95	40	31	59	52	90	36	33
70	Plasma kallikrein OS=Homo sapiens OX=9606 GN=KLKB1 PE=1 SV=1	KLKB1_HUMAN	KLKB1	71 kDa	Homo sapiens	70	52	72	90	63	81	49	63	74	48	66	84	51	58	77	74
71	Complement C1q subcomponent subunit B OS=Homo sapiens OX=9606 GN=C1QB PE=1 SV=3	C1QB_HUMAN	C1QB	27 kDa	Homo sapiens	54	55	34	64	83	45	75	87	111	50	45	68	47	112	63	44
72	Kallistatin OS=Homo sapiens OX=9606 GN=SERPINA4 PE=1 SV=3	KAIN_HUMAN	SERPINA4	49 kDa	Homo sapiens	58	67	77	79	49	53	47	59	68	70	87	70	50	67	71	64
73	Vitronectin OS=Homo sapiens OX=9606 GN=VTN PE=1 SV=1	VTNC_HUMAN	VTN	54 kDa	Homo sapiens	65	54	71	65	62	59	49	63	54	61	83	52	60	51	55	65
74	Complement factor I OS=Homo sapiens OX=9606 GN=CFI PE=1 SV=2	CFAI_HUMAN	CFI	66 kDa	Homo sapiens	57	51	48	77	67	53	62	62	57	58	67	74	70	58	66	68
75	Immunoglobulin heavy variable 4-38-2 OS=Homo sapiens OX=9606 GN=IGHV4-38-2 PE=3 SV=1	HVD82_HUMAN	IGHV4-38-2	13 kDa	Homo sapiens	41	77	61	75	68	66	51	65	56	53	113	83	47	42	42	57
76	Coagulation factor XIII B chain OS=Homo sapiens OX=9606 GN=F13B PE=1 SV=3	F13B_HUMAN	F13B	76 kDa	Homo sapiens	67	35	26	52	65	14	54	41	77	85	28	70	30	79	70	31
77	Pregnancy zone protein OS=Homo sapiens OX=9606 GN=PZP PE=1 SV=4	PZP_HUMAN	PZP	164 kDa	Homo sapiens	336	355	621	289	0	237	280	245	261	340	0	234	250	227	325	0
78	Complement C2 OS=Homo sapiens OX=9606 GN=C2 PE=1 SV=2	CO2_HUMAN	C2	83 kDa	Homo sapiens	52	48	61	53	50	55	45	55	36	57	53	38	63	26	59	67
79	Actin, cytoplasmic 1 OS=Homo sapiens OX=9606 GN=ACTB PE=1 SV=1	ACTB_HUMAN	ACTB	42 kDa	Homo sapiens	66	40	44	61	68	17	37	55	52	30	50	62	89	64	57	58
80	Thrombospondin-1 OS=Homo sapiens OX=9606 GN=THBS1 PE=1 SV=2	TSP1_HUMAN	THBS1	129 kDa	Homo sapiens	31	19	72	20	18	74	5	68	46	29	39	54	51	46	69	29
81	Talin-1 OS=Homo sapiens OX=9606 GN=TLN1 PE=1 SV=3	TLN1_HUMAN	TLN1	270 kDa	Homo sapiens	79	36	45	59	70	0	10	46	42	3	33	60	78	61	43	32
82	Inter-alpha-trypsin inhibitor heavy chain H3 OS=Homo sapiens OX=9606 GN=ITIH3 PE=1 SV=2	ITIH3_HUMAN	ITIH3	100 kDa	Homo sapiens	66	37	40	39	17	47	42	37	36	72	44	37	50	42	52	31
83	Insulin-like growth factor-binding protein complex acid labile subunit OS=Homo sapiens OX=9606 GN=IGFALS PE=1 SV=1	ALS_HUMAN	IGFALS	66 kDa	Homo sapiens	65	27	58	71	51	71	50	52	48	45	37	60	46	49	44	68
84	Immunoglobulin alpha-2 heavy chain OS=Homo sapiens OX=9606 PE=1 SV=2	IGA2_HUMAN	IGA2	49 kDa	Homo sapiens	90	118	86	88	135	111	127	105	95	98	70	83	84	69	87	102
85	Keratin, type I cytoskeletal 10 OS=Homo sapiens OX=9606 GN=KRT10 PE=1 SV=6	K1C10_HUMAN	KRT10	59 kDa	Homo sapiens	63	89	60	34	38	31	49	39	69	36	20	33	32	38	66	37
86	Coagulation factor XIII A chain OS=Homo sapiens OX=9606 GN=F13A1 PE=1 SV=4	F13A_HUMAN	F13A1	83 kDa	Homo sapiens	57	43	33	57	51	4	49	26	67	70	21	60	38	67	80	39
87	Carboxypeptidase N subunit 2 OS=Homo sapiens OX=9606 GN=CPN2 PE=1 SV=3	CPN2_HUMAN	CPN2	61 kDa	Homo sapiens	44	54	58	53	45	49	41	41	40	38	57	47	33	47	61	45
88	Immunoglobulin kappa variable 4-1 OS=Homo sapiens OX=9606 GN=IGKV4-1 PE=1 SV=1	KV401_HUMAN	IGKV4-1	13 kDa	Homo sapiens	33	46	36	48	50	37	39	39	41	33	91	58	30	32	35	35
89	Coagulation factor XII OS=Homo sapiens OX=9606 GN=F12 PE=1 SV=3	FA12_HUMAN	F12	68 kDa	Homo sapiens	52	47	42	45	32	59	40	37	57	45	44	50	24	41	40	41
90	Immunoglobulin kappa light chain OS=Homo sapiens OX=9606 PE=1 SV=1	IGK_HUMAN	IGK	23 kDa	Homo sapiens	932	1392	815	933	1100	970	1031	920	973	1016	1015	926	851	845	825	863
91	Immunoglobulin J chain OS=Homo sapiens OX=9606 GN=JCHAIN PE=1 SV=4	IGJ_HUMAN	JCHAIN	18 kDa	Homo sapiens	24	84	30	42	24	24	39	23	36	18	27	44	20	32	25	18
92	Complement component C8 gamma chain OS=Homo sapiens OX=9606 GN=C8G PE=1 SV=3	CO8G_HUMAN	C8G	22 kDa	Homo sapiens	41	41	35	36	38	44	35	35	50	37	40	55	42	36	39	36
93	Immunoglobulin heavy variable 3-30 OS=Homo sapiens OX=9606 GN=IGHV3-30 PE=1 SV=2	HV330_HUMAN (+1)	IGHV3-30	13 kDa	Homo sapiens	31	32	23	24	36	38	26	30	44	34	153	22	28	31	38	25
94	von Willebrand factor OS=Homo sapiens OX=9606 GN=VWF PE=1 SV=4	VWF_HUMAN	VWF	309 kDa	Homo sapiens	99	8	6	23	6	4	10	34	92	71	12	6	23	44	107	6
95	Serum amyloid P-component OS=Homo sapiens OX=9606 GN=APCS PE=1 SV=2	SAMP_HUMAN	APCS	25 kDa	Homo sapiens	52	63	65	52	47	42	27	43	40	39	44	34	52	45	33	32
96	Pigment epithelium-derived factor OS=Homo sapiens OX=9606 GN=SERPINF1 PE=1 SV=4	PEDF_HUMAN	SERPINF1	46 kDa	Homo sapiens	51	48	43	33	36	35	29	38	34	43	43	47	47	69	59	48
97	Immunoglobulin heavy variable 5-51 OS=Homo sapiens OX=9606 GN=IGHV5-51 PE=3 SV=1	HV551_HUMAN	IGHV5-51	13 kDa	Homo sapiens	29	54	37	49	40	22	33	33	48	35	99	38	22	34	24	41
98	Apolipoprotein L1 OS=Homo sapiens OX=9606 GN=APOL1 PE=1 SV=5	APOL1_HUMAN	APOL1	44 kDa	Homo sapiens	43	35	44	43	38	32	40	33	46	23	38	38	46	40	42	46
99	Haptoglobin-related protein OS=Homo sapiens OX=9606 GN=HPR PE=2 SV=2	HPTR_HUMAN	HPR	39 kDa	Homo sapiens	151	130	171	122	139	125	127	129	182	179	213	112	235	164	121	135
100	Fibulin-1 OS=Homo sapiens OX=9606 GN=FBLN1 PE=1 SV=4	FBLN1_HUMAN	FBLN1	77 kDa	Homo sapiens	19	47	23	28	39	35	55	32	18	41	45	36	18	35	42	36
101	Immunoglobulin lambda variable 3-21 OS=Homo sapiens OX=9606 GN=IGLV3-21 PE=1 SV=2	LV321_HUMAN	IGLV3-21	12 kDa	Homo sapiens	35	50	41	33	58	0	38	58	26	29	0	0	47	30	0	50
102	Coagulation factor V OS=Homo sapiens OX=9606 GN=F5 PE=1 SV=4	FA5_HUMAN	F5	252 kDa	Homo sapiens	46	22	49	48	23	12	12	24	32	41	35	30	21	30	53	10
103	Ficolin-3 OS=Homo sapiens OX=9606 GN=FCN3 PE=1 SV=2	FCN3_HUMAN	FCN3	33 kDa	Homo sapiens	59	10	25	26	11	32	27	27	25	24	30	53	29	49	44	18
104	Hepatocyte growth factor-like protein OS=Homo sapiens OX=9606 GN=MST1 PE=1 SV=2	HGFL_HUMAN	MST1	80 kDa	Homo sapiens	32	19	12	30	33	18	28	24	34	34	23	27	42	34	27	29
105	IgGFc-binding protein OS=Homo sapiens OX=9606 GN=FCGBP PE=1 SV=3	FCGBP_HUMAN	FCGBP	572 kDa	Homo sapiens	20	14	10	65	12	21	36	21	21	26	38	12	21	54	22	21
106	Immunoglobulin heavy variable 3-9 OS=Homo sapiens OX=9606 GN=IGHV3-9 PE=1 SV=2	HV309_HUMAN	IGHV3-9	13 kDa	Homo sapiens	36	86	35	20	31	42	25	38	40	23	49	29	15	30	49	51
107	Immunoglobulin heavy variable 3-23 OS=Homo sapiens OX=9606 GN=IGHV3-23 PE=1 SV=2	HV323_HUMAN	IGHV3-23	13 kDa	Homo sapiens	33	46	45	38	35	39	0	35	57	46	129	39	29	39	42	29
108	Immunoglobulin delta heavy chain OS=Homo sapiens OX=9606 PE=1 SV=1	IGD_HUMAN	IGD	56 kDa	Homo sapiens	6	16	0	16	79	60	85	36	0	13	9	31	8	14	10	13
109	Carboxypeptidase B2 OS=Homo sapiens OX=9606 GN=CPB2 PE=1 SV=2	CBPB2_HUMAN	CPB2	48 kDa	Homo sapiens	28	29	29	29	25	23	14	18	30	32	25	35	29	29	27	21
110	Properdin OS=Homo sapiens OX=9606 GN=CFP PE=1 SV=2	PROP_HUMAN	CFP	51 kDa	Homo sapiens	23	24	23	29	19	21	25	21	20	19	22	22	26	28	22	19
111	Apolipoprotein(a) OS=Homo sapiens OX=9606 GN=LPA PE=1 SV=1	APOA_HUMAN	LPA	501 kDa	Homo sapiens	8	3	45	6	14	13	73	6	129	8	0	9	30	2	15	0
112	Thyroxine-binding globulin OS=Homo sapiens OX=9606 GN=SERPINA7 PE=1 SV=2	THBG_HUMAN	SERPINA7	46 kDa	Homo sapiens	18	15	18	22	25	20	17	28	26	34	25	38	16	17	21	22
113	Immunoglobulin heavy variable 4-61 OS=Homo sapiens OX=9606 GN=IGHV4-61 PE=3 SV=1	HV461_HUMAN	IGHV4-61	13 kDa	Homo sapiens	0	0	0	0	0	0	0	0	0	0	0	0	71	0	0	0
114	Lipopolysaccharide-binding protein OS=Homo sapiens OX=9606 GN=LBP PE=1 SV=3	LBP_HUMAN	LBP	53 kDa	Homo sapiens	34	21	23	26	20	25	16	15	27	42	21	41	54	27	26	29
115	Keratin, type II cytoskeletal 2 epidermal OS=Homo sapiens OX=9606 GN=KRT2 PE=1 SV=2	K22E_HUMAN	KRT2	65 kDa	Homo sapiens	34	82	41	27	24	14	31	25	42	20	15	19	26	21	45	19
116	Immunoglobulin lambda-1 light chain OS=Homo sapiens OX=9606 PE=1 SV=1	IGL1_HUMAN	IGL1	23 kDa	Homo sapiens	146	200	163	105	190	146	176	175	186	151	201	111	136	154	142	119
117	Transcription factor 20 OS=Homo sapiens OX=9606 GN=TCF20 PE=1 SV=3	TCF20_HUMAN	TCF20	212 kDa	Homo sapiens	0	0	0	0	0	0	0	1	0	0	0	0	0	0	0	0
118	Filamin-A OS=Homo sapiens OX=9606 GN=FLNA PE=1 SV=4	FLNA_HUMAN	FLNA	281 kDa	Homo sapiens	36	7	5	19	25	0	5	9	16	0	12	61	40	22	16	6
119	Immunoglobulin heavy variable 3-30-3 OS=Homo sapiens OX=9606 GN=IGHV3-30-3 PE=3 SV=1	HVC33_HUMAN	IGHV3-30-3	13 kDa	Homo sapiens	0	48	0	0	0	0	0	0	0	0	99	0	0	0	0	0
120	Immunoglobulin heavy variable 3-49 OS=Homo sapiens OX=9606 GN=IGHV3-49 PE=3 SV=1	HV349_HUMAN	IGHV3-49	13 kDa	Homo sapiens	12	18	25	12	31	10	15	18	14	10	48	22	16	15	2	28
121	Carboxypeptidase N catalytic chain OS=Homo sapiens OX=9606 GN=CPN1 PE=1 SV=1	CBPN_HUMAN	CPN1	52 kDa	Homo sapiens	14	19	23	21	12	26	18	20	20	11	24	20	16	14	19	21
122	Serum amyloid A-4 protein OS=Homo sapiens OX=9606 GN=SAA4 PE=1 SV=2	SAA4_HUMAN	SAA4	15 kDa	Homo sapiens	24	16	32	18	24	17	8	8	27	22	19	17	24	21	20	16
123	Afamin OS=Homo sapiens OX=9606 GN=AFM PE=1 SV=1	AFAM_HUMAN	AFM	69 kDa	Homo sapiens	18	13	24	17	12	22	6	23	11	14	25	15	10	8	17	19
124	Apolipoprotein C-III OS=Homo sapiens OX=9606 GN=APOC3 PE=1 SV=1	APOC3_HUMAN	APOC3	11 kDa	Homo sapiens	22	23	38	17	14	12	6	9	18	17	27	20	16	27	28	26
125	Immunoglobulin kappa variable 1-8 OS=Homo sapiens OX=9606 GN=IGKV1-8 PE=3 SV=1	KV108_HUMAN	IGKV1-8	13 kDa	Homo sapiens	18	25	24	19	22	13	32	19	17	22	47	19	21	19	20	15
126	Titin OS=Homo sapiens OX=9606 GN=TTN PE=1 SV=4	TITIN_HUMAN	TTN	3816 kDa	Homo sapiens	0	0	1	2	0	0	0	2	2	2	2	0	1	0	2	1
127	Immunoglobulin heavy variable 3-7 OS=Homo sapiens OX=9606 GN=IGHV3-7 PE=1 SV=2	HV307_HUMAN	IGHV3-7	13 kDa	Homo sapiens	18	45	19	16	29	15	21	22	22	18	23	16	15	15	18	20
128	Leucine-rich alpha-2-glycoprotein OS=Homo sapiens OX=9606 GN=LRG1 PE=1 SV=2	A2GL_HUMAN	LRG1	38 kDa	Homo sapiens	27	19	14	19	12	14	7	15	22	34	22	21	42	25	24	20
129	Apolipoprotein D OS=Homo sapiens OX=9606 GN=APOD PE=1 SV=1	APOD_HUMAN	APOD	21 kDa	Homo sapiens	15	20	34	27	16	15	9	15	18	14	15	8	10	17	28	17
130	Plasma serine protease inhibitor OS=Homo sapiens OX=9606 GN=SERPINA5 PE=1 SV=3	IPSP_HUMAN	SERPINA5	46 kDa	Homo sapiens	16	22	14	24	29	22	13	24	14	20	25	26	7	10	10	37
131	Protein Z-dependent protease inhibitor OS=Homo sapiens OX=9606 GN=SERPINA10 PE=1 SV=1	ZPI_HUMAN	SERPINA10	51 kDa	Homo sapiens	19	5	34	24	13	13	15	11	17	5	16	17	15	8	20	16
132	Alpha-1-acid glycoprotein 2 OS=Homo sapiens OX=9606 GN=ORM2 PE=1 SV=2	A1AG2_HUMAN	ORM2	24 kDa	Homo sapiens	19	8	19	12	12	19	13	23	19	15	20	14	21	19	17	18
133	Vitamin K-dependent protein C OS=Homo sapiens OX=9606 GN=PROC PE=1 SV=1	PROC_HUMAN	PROC	52 kDa	Homo sapiens	26	10	17	36	10	9	7	14	25	11	20	11	11	13	28	19
134	Ficolin-2 OS=Homo sapiens OX=9606 GN=FCN2 PE=1 SV=2	FCN2_HUMAN	FCN2	34 kDa	Homo sapiens	10	0	0	13	6	10	9	15	20	4	15	16	17	3	21	17
135	Galectin-3-binding protein OS=Homo sapiens OX=9606 GN=LGALS3BP PE=1 SV=1	LG3BP_HUMAN	LGALS3BP	65 kDa	Homo sapiens	12	15	48	15	12	5	5	11	14	17	22	19	27	14	30	16
136	Beta-Ala-His dipeptidase OS=Homo sapiens OX=9606 GN=CNDP1 PE=1 SV=4	CNDP1_HUMAN	CNDP1	57 kDa	Homo sapiens	22	7	37	25	18	15	9	19	26	13	11	18	10	22	26	30
137	Immunoglobulin heavy variable 3-74 OS=Homo sapiens OX=9606 GN=IGHV3-74 PE=3 SV=1	HV374_HUMAN	IGHV3-74	13 kDa	Homo sapiens	27	31	22	28	34	25	22	29	32	23	33	39	29	30	37	32
138	Hyaluronan-binding protein 2 OS=Homo sapiens OX=9606 GN=HABP2 PE=1 SV=1	HABP2_HUMAN	HABP2	63 kDa	Homo sapiens	19	16	17	14	10	7	11	11	18	18	25	17	15	19	16	17
139	Immunoglobulin heavy variable 1-18 OS=Homo sapiens OX=9606 GN=IGHV1-18 PE=3 SV=1	HV118_HUMAN	IGHV1-18	13 kDa	Homo sapiens	12	15	15	17	22	7	8	18	11	9	49	8	15	24	12	23
140	Complement factor H-related protein 1 OS=Homo sapiens OX=9606 GN=CFHR1 PE=1 SV=2	FHR1_HUMAN	CFHR1	38 kDa	Homo sapiens	45	32	34	24	42	38	36	39	47	50	42	47	31	26	40	38
141	Corticosteroid-binding globulin OS=Homo sapiens OX=9606 GN=SERPINA6 PE=1 SV=1	CBG_HUMAN	SERPINA6	45 kDa	Homo sapiens	19	8	18	17	22	16	13	21	14	20	13	23	14	15	14	15
142	C4b-binding protein beta chain OS=Homo sapiens OX=9606 GN=C4BPB PE=1 SV=1	C4BPB_HUMAN	C4BPB	28 kDa	Homo sapiens	15	8	8	9	9	12	21	11	34	14	8	16	14	17	20	9
143	Immunoglobulin heavy variable 3-72 OS=Homo sapiens OX=9606 GN=IGHV3-72 PE=3 SV=1	HV372_HUMAN	IGHV3-72	13 kDa	Homo sapiens	15	25	18	18	15	22	17	16	13	11	13	20	11	16	18	22
144	Tetranectin OS=Homo sapiens OX=9606 GN=CLEC3B PE=1 SV=3	TETN_HUMAN	CLEC3B	23 kDa	Homo sapiens	11	17	11	23	18	18	22	13	11	15	18	12	16	13	13	16
145	Coagulation factor XI OS=Homo sapiens OX=9606 GN=F11 PE=1 SV=1	FA11_HUMAN	F11	70 kDa	Homo sapiens	15	7	25	15	9	24	9	22	10	21	15	14	8	8	19	13
146	Immunoglobulin kappa variable 2-40 OS=Homo sapiens OX=9606 GN=IGKV2-40 PE=3 SV=2	KV240_HUMAN (+1)	IGKV2-40	13 kDa	Homo sapiens	15	16	9	26	11	22	15	15	14	13	23	16	8	20	13	10
147	Mannan-binding lectin serine protease 1 OS=Homo sapiens OX=9606 GN=MASP1 PE=1 SV=3	MASP1_HUMAN	MASP1	79 kDa	Homo sapiens	16	7	9	16	4	12	16	5	13	5	16	5	14	12	9	11
148	Prenylcysteine oxidase 1 OS=Homo sapiens OX=9606 GN=PCYOX1 PE=1 SV=3	PCYOX_HUMAN	PCYOX1	57 kDa	Homo sapiens	14	18	23	25	4	8	18	9	8	9	13	16	11	10	11	18
149	Coagulation factor IX OS=Homo sapiens OX=9606 GN=F9 PE=1 SV=2	FA9_HUMAN	F9	52 kDa	Homo sapiens	18	14	23	17	18	11	9	12	17	16	16	21	18	18	20	11
150	Immunoglobulin kappa variable 1-39 OS=Homo sapiens OX=9606 GN=IGKV1-39 PE=1 SV=2	KV139_HUMAN (+1)	IGKV1-39	13 kDa	Homo sapiens	8	21	0	9	7	6	16	9	17	18	42	22	17	15	13	18
151	Apolipoprotein M OS=Homo sapiens OX=9606 GN=APOM PE=1 SV=2	APOM_HUMAN	APOM	21 kDa	Homo sapiens	29	22	21	30	2	6	4	6	7	8	12	3	24	23	29	18
152	Immunoglobulin kappa variable 3D-15 OS=Homo sapiens OX=9606 GN=IGKV3D-15 PE=3 SV=6	KVD15_HUMAN	IGKV3D-15	13 kDa	Homo sapiens	0	18	6	11	10	5	12	5	9	12	18	0	0	7	8	8
153	Adiponectin OS=Homo sapiens OX=9606 GN=ADIPOQ PE=1 SV=1	ADIPO_HUMAN	ADIPOQ	26 kDa	Homo sapiens	2	12	37	18	0	11	11	4	16	14	5	4	16	17	29	5
154	Platelet factor 4 OS=Homo sapiens OX=9606 GN=PF4 PE=1 SV=2	PLF4_HUMAN	PF4	11 kDa	Homo sapiens	17	8	17	0	12	22	0	23	13	7	8	17	13	11	22	7
155	Glutathione peroxidase 3 OS=Homo sapiens OX=9606 GN=GPX3 PE=1 SV=2	GPX3_HUMAN	GPX3	26 kDa	Homo sapiens	13	10	18	16	11	12	5	7	11	10	10	14	8	7	15	9
156	Immunoglobulin kappa variable 1-5 OS=Homo sapiens OX=9606 GN=IGKV1-5 PE=1 SV=2	KV105_HUMAN	IGKV1-5	13 kDa	Homo sapiens	0	15	0	16	0	0	0	16	0	0	34	0	0	0	0	0
157	Apolipoprotein C-I OS=Homo sapiens OX=9606 GN=APOC1 PE=1 SV=1	APOC1_HUMAN	APOC1	9 kDa	Homo sapiens	12	10	24	16	9	14	14	9	13	9	14	10	12	14	19	12
158	Myosin-9 OS=Homo sapiens OX=9606 GN=MYH9 PE=1 SV=4	MYH9_HUMAN	MYH9	227 kDa	Homo sapiens	72	0	0	3	8	0	7	8	8	0	2	27	54	10	13	4
159	Mannose-binding protein C OS=Homo sapiens OX=9606 GN=MBL2 PE=1 SV=2	MBL2_HUMAN	MBL2	26 kDa	Homo sapiens	9	13	2	28	9	7	0	0	18	17	20	0	17	16	1	16
160	Phospholipid transfer protein OS=Homo sapiens OX=9606 GN=PLTP PE=1 SV=1	PLTP_HUMAN	PLTP	55 kDa	Homo sapiens	15	12	8	22	16	16	14	12	12	9	13	12	15	13	14	9
161	Sex hormone-binding globulin OS=Homo sapiens OX=9606 GN=SHBG PE=1 SV=2	SHBG_HUMAN	SHBG	44 kDa	Homo sapiens	9	21	28	13	9	24	32	9	11	6	5	8	7	8	10	11
162	Collagen alpha-1(XII) chain OS=Homo sapiens OX=9606 GN=COL12A1 PE=1 SV=2	COCA1_HUMAN	COL12A1	333 kDa	Homo sapiens	0	2	3	2	0	2	0	1	0	1	2	0	0	2	2	3
163	Phosphatidylinositol-glycan-specific phospholipase D OS=Homo sapiens OX=9606 GN=GPLD1 PE=1 SV=3	PHLD_HUMAN	GPLD1	92 kDa	Homo sapiens	29	14	19	23	5	12	7	12	10	16	15	12	8	17	15	6
164	Complement C4-A OS=Homo sapiens OX=9606 GN=C4A PE=1 SV=2	CO4A_HUMAN	C4A	193 kDa	Homo sapiens	974	781	0	786	784	763	951	804	864	884	867	856	1000	835	984	1022
165	Immunoglobulin heavy variable 3-53 OS=Homo sapiens OX=9606 GN=IGHV3-53 PE=1 SV=2	HV353_HUMAN	IGHV3-53	13 kDa	Homo sapiens	16	40	15	24	35	0	12	25	28	17	55	19	0	24	0	16
166	Cartilage oligomeric matrix protein OS=Homo sapiens OX=9606 GN=COMP PE=1 SV=2	COMP_HUMAN	COMP	83 kDa	Homo sapiens	5	19	4	9	9	7	6	9	6	7	13	19	7	10	7	17
167	Immunoglobulin kappa variable 1-33 OS=Homo sapiens OX=9606 GN=IGKV1-33 PE=1 SV=2	KV133_HUMAN (+1)	IGKV1-33	13 kDa	Homo sapiens	7	11	9	13	14	10	8	13	10	16	19	10	8	13	6	11
168	Immunoglobulin heavy variable 4-39 OS=Homo sapiens OX=9606 GN=IGHV4-39 PE=1 SV=2	HV439_HUMAN	IGHV4-39	14 kDa	Homo sapiens	0	0	0	0	0	0	0	0	0	0	211	0	0	0	0	0
169	Sulfhydryl oxidase 1 OS=Homo sapiens OX=9606 GN=QSOX1 PE=1 SV=3	QSOX1_HUMAN	QSOX1	83 kDa	Homo sapiens	17	29	6	25	4	9	5	9	11	4	30	8	8	15	13	11
170	Cholinesterase OS=Homo sapiens OX=9606 GN=BCHE PE=1 SV=1	CHLE_HUMAN	BCHE	68 kDa	Homo sapiens	9	13	11	14	9	9	12	16	13	9	13	17	4	7	6	14
171	Immunoglobulin heavy variable 3-21 OS=Homo sapiens OX=9606 GN=IGHV3-21 PE=1 SV=1	HV321_HUMAN	IGHV3-21	13 kDa	Homo sapiens	0	47	16	0	23	0	0	17	28	19	54	20	16	20	0	20
172	Immunoglobulin kappa variable 3-20 OS=Homo sapiens OX=9606 GN=IGKV3-20 PE=1 SV=2	KV320_HUMAN	IGKV3-20	13 kDa	Homo sapiens	0	145	0	0	0	0	0	0	0	0	0	0	0	0	0	108
173	TSC22 domain family protein 2 OS=Homo sapiens OX=9606 GN=TSC22D2 PE=1 SV=3	T22D2_HUMAN	TSC22D2	79 kDa	Homo sapiens	1	0	0	0	0	0	0	0	0	0	0	0	0	0	0	0
174	Transforming growth factor-beta-induced protein ig-h3 OS=Homo sapiens OX=9606 GN=TGFBI PE=1 SV=1	BGH3_HUMAN	TGFBI	75 kDa	Homo sapiens	11	4	11	14	7	10	9	7	4	7	16	15	5	9	15	11
175	Proteoglycan 4 OS=Homo sapiens OX=9606 GN=PRG4 PE=1 SV=3	PRG4_HUMAN	PRG4	151 kDa	Homo sapiens	17	8	8	10	6	11	4	7	13	5	17	21	12	6	22	20
176	EGF-containing fibulin-like extracellular matrix protein 1 OS=Homo sapiens OX=9606 GN=EFEMP1 PE=1 SV=2	FBLN3_HUMAN	EFEMP1	55 kDa	Homo sapiens	8	25	8	7	6	5	12	8	13	20	16	9	9	22	9	6
177	Monocyte differentiation antigen CD14 OS=Homo sapiens OX=9606 GN=CD14 PE=1 SV=2	CD14_HUMAN	CD14	40 kDa	Homo sapiens	15	1	13	8	12	12	15	15	12	14	18	11	17	14	14	17
178	Immunoglobulin heavy variable 1-69 OS=Homo sapiens OX=9606 GN=IGHV1-69 PE=1 SV=2	HV169_HUMAN	IGHV1-69	13 kDa	Homo sapiens	6	20	5	12	9	10	4	10	13	11	39	7	10	8	8	13
179	Immunoglobulin kappa variable 3-11 OS=Homo sapiens OX=9606 GN=IGKV3-11 PE=1 SV=1	KV311_HUMAN (+1)	IGKV3-11	13 kDa	Homo sapiens	7	13	10	18	14	9	11	9	11	7	18	11	9	17	10	8
180	Immunoglobulin heavy variable 1-2 OS=Homo sapiens OX=9606 GN=IGHV1-2 PE=1 SV=2	HV102_HUMAN	IGHV1-2	13 kDa	Homo sapiens	8	21	14	14	10	14	11	12	5	5	17	21	5	6	16	15
181	Immunoglobulin heavy variable 2-26 OS=Homo sapiens OX=9606 GN=IGHV2-26 PE=3 SV=1	HV226_HUMAN	IGHV2-26	13 kDa	Homo sapiens	0	14	13	15	6	9	10	11	0	0	24	6	11	0	0	11
182	Apolipoprotein C-IV OS=Homo sapiens OX=9606 GN=APOC4 PE=1 SV=1	APOC4_HUMAN	APOC4	15 kDa	Homo sapiens	23	5	19	14	10	13	9	11	11	7	12	9	4	13	13	11
183	Immunoglobulin lambda variable 4-69 OS=Homo sapiens OX=9606 GN=IGLV4-69 PE=1 SV=1	LV469_HUMAN	IGLV4-69	13 kDa	Homo sapiens	0	10	10	11	14	8	2	10	12	9	45	6	6	7	5	9
184	Immunoglobulin heavy variable 3-15 OS=Homo sapiens OX=9606 GN=IGHV3-15 PE=3 SV=1	HV315_HUMAN	IGHV3-15	13 kDa	Homo sapiens	8	8	7	6	12	10	9	5	11	7	20	7	8	12	10	15
185	Alpha-1-acid glycoprotein 1 OS=Homo sapiens OX=9606 GN=ORM1 PE=1 SV=1	A1AG1_HUMAN	ORM1	24 kDa	Homo sapiens	17	10	22	14	17	17	14	15	21	12	21	24	17	17	16	19
186	Immunoglobulin kappa variable 1-16 OS=Homo sapiens OX=9606 GN=IGKV1-16 PE=1 SV=2	KV116_HUMAN	IGKV1-16	13 kDa	Homo sapiens	0	16	0	14	14	0	0	0	9	0	23	10	7	12	3	0
187	Carbonic anhydrase 1 OS=Homo sapiens OX=9606 GN=CA1 PE=1 SV=2	CAH1_HUMAN	CA1	29 kDa	Homo sapiens	17	4	15	5	3	0	8	3	3	6	4	13	17	32	10	7
188	Immunoglobulin epsilon heavy chain OS=Homo sapiens OX=9606 PE=1 SV=1	IGE_HUMAN	IGE	60 kDa	Homo sapiens	1	9	3	2	2	1	0	2	6	5	15	1	2	0	1	4
189	Attractin OS=Homo sapiens OX=9606 GN=ATRN PE=1 SV=2	ATRN_HUMAN	ATRN	159 kDa	Homo sapiens	7	10	4	14	2	9	11	18	7	6	14	10	1	4	5	9
190	Actin, alpha skeletal muscle OS=Homo sapiens OX=9606 GN=ACTA1 PE=1 SV=1	ACTS_HUMAN	ACTA1	42 kDa	Homo sapiens	38	24	29	33	34	6	20	28	27	11	31	32	44	36	32	27
191	Polymeric immunoglobulin receptor OS=Homo sapiens OX=9606 GN=PIGR PE=1 SV=4	PIGR_HUMAN	PIGR	83 kDa	Homo sapiens	10	23	17	8	5	6	7	10	9	7	4	14	8	6	14	8
192	Keratin, type II cuticular Hb6 OS=Homo sapiens OX=9606 GN=KRT86 PE=1 SV=1	KRT86_HUMAN	KRT86	53 kDa	Homo sapiens	2	0	0	0	0	0	0	0	22	1	0	2	3	6	0	29
193	Immunoglobulin heavy variable 3-48 OS=Homo sapiens OX=9606 GN=IGHV3-48 PE=1 SV=2	HV348_HUMAN	IGHV3-48	13 kDa	Homo sapiens	0	64	18	0	36	0	0	18	0	0	14	20	0	0	0	21
194	Immunoglobulin heavy variable 1-24 OS=Homo sapiens OX=9606 GN=IGHV1-24 PE=3 SV=1	HV124_HUMAN	IGHV1-24	13 kDa	Homo sapiens	7	6	0	0	0	0	0	4	8	14	71	4	0	10	0	0
195	Immunoglobulin kappa variable 1D-8 OS=Homo sapiens OX=9606 GN=IGKV1D-8 PE=3 SV=6	KVD08_HUMAN	IGKV1D-8	13 kDa	Homo sapiens	2	0	0	12	0	13	20	0	5	11	19	0	0	0	0	0
196	Transferrin receptor protein 1 OS=Homo sapiens OX=9606 GN=TFRC PE=1 SV=2	TFR1_HUMAN	TFRC	85 kDa	Homo sapiens	12	0	8	8	1	2	9	6	5	11	11	12	22	6	7	9
197	Immunoglobulin kappa variable 1D-12 OS=Homo sapiens OX=9606 GN=IGKV1D-12 PE=1 SV=2	KVD12_HUMAN	IGKV1D-12	13 kDa	Homo sapiens	0	0	0	0	0	0	0	0	0	0	40	0	0	0	0	0
198	Immunoglobulin lambda variable 1-51 OS=Homo sapiens OX=9606 GN=IGLV1-51 PE=1 SV=2	LV151_HUMAN	IGLV1-51	12 kDa	Homo sapiens	0	13	10	8	10	2	4	9	4	0	15	0	9	11	0	8
199	Adipocyte plasma membrane-associated protein OS=Homo sapiens OX=9606 GN=APMAP PE=1 SV=2	APMAP_HUMAN	APMAP	46 kDa	Homo sapiens	13	10	19	11	2	8	5	5	7	9	6	8	8	4	10	7
200	Immunoglobulin heavy variable 3-64D OS=Homo sapiens OX=9606 GN=IGHV3-64D PE=3 SV=1	HV64D_HUMAN	IGHV3-64D	13 kDa	Homo sapiens	4	10	9	8	13	7	2	4	4	4	10	10	5	10	2	9
201	Immunoglobulin heavy variable 3-73 OS=Homo sapiens OX=9606 GN=IGHV3-73 PE=3 SV=1	HV373_HUMAN	IGHV3-73	13 kDa	Homo sapiens	7	8	8	6	9	7	7	10	7	6	21	4	4	9	3	8
202	Vinculin OS=Homo sapiens OX=9606 GN=VCL PE=1 SV=4	VINC_HUMAN	VCL	124 kDa	Homo sapiens	18	10	7	7	7	0	0	8	9	0	8	13	16	6	9	5
203	Immunoglobulin heavy variable 2-5 OS=Homo sapiens OX=9606 GN=IGHV2-5 PE=1 SV=2	HV205_HUMAN	IGHV2-5	13 kDa	Homo sapiens	0	19	6	10	13	7	0	10	8	10	6	7	0	7	12	9
204	Biotinidase OS=Homo sapiens OX=9606 GN=BTD PE=1 SV=2	BTD_HUMAN	BTD	61 kDa	Homo sapiens	11	4	5	11	9	0	1	5	3	8	11	10	7	9	12	11
205	Immunoglobulin heavy variable 3-13 OS=Homo sapiens OX=9606 GN=IGHV3-13 PE=1 SV=2	HV313_HUMAN	IGHV3-13	13 kDa	Homo sapiens	0	30	0	0	10	7	9	0	15	14	20	18	0	0	0	16
206	Phosphatidylcholine-sterol acyltransferase OS=Homo sapiens OX=9606 GN=LCAT PE=1 SV=1	LCAT_HUMAN	LCAT	50 kDa	Homo sapiens	13	10	9	8	5	4	5	8	8	16	13	6	3	6	1	7
207	Coagulation factor X OS=Homo sapiens OX=9606 GN=F10 PE=1 SV=2	FA10_HUMAN	F10	55 kDa	Homo sapiens	8	4	10	9	10	3	5	4	8	7	6	8	5	6	9	9
208	Immunoglobulin kappa variable 1-27 OS=Homo sapiens OX=9606 GN=IGKV1-27 PE=3 SV=1	KV127_HUMAN	IGKV1-27	13 kDa	Homo sapiens	0	22	20	18	16	11	23	19	17	17	30	0	0	0	18	0
209	Immunoglobulin heavy variable 3-43 OS=Homo sapiens OX=9606 GN=IGHV3-43 PE=3 SV=1	HV343_HUMAN	IGHV3-43	13 kDa	Homo sapiens	13	26	13	0	16	19	8	15	0	0	0	16	11	0	14	15
210	Cystatin-C OS=Homo sapiens OX=9606 GN=CST3 PE=1 SV=1	CYTC_HUMAN	CST3	16 kDa	Homo sapiens	5	5	2	6	2	2	2	3	6	5	6	3	0	24	3	3
211	Serine/threonine-protein kinase Nek4 OS=Homo sapiens OX=9606 GN=NEK4 PE=1 SV=2	NEK4_HUMAN	NEK4	95 kDa	Homo sapiens	0	0	0	0	0	0	0	0	0	0	0	1	0	2	0	0
212	Junction plakoglobin OS=Homo sapiens OX=9606 GN=JUP PE=1 SV=3	PLAK_HUMAN	JUP	82 kDa	Homo sapiens	1	2	0	0	0	0	0	0	0	0	1	0	0	0	1	0
213	Pleckstrin OS=Homo sapiens OX=9606 GN=PLEK PE=1 SV=3	PLEK_HUMAN	PLEK	40 kDa	Homo sapiens	14	3	16	14	13	0	0	8	11	0	8	12	12	5	4	4
214	Hemoglobin subunit delta OS=Homo sapiens OX=9606 GN=HBD PE=1 SV=2	HBD_HUMAN	HBD	16 kDa	Homo sapiens	54	55	70	49	51	0	65	42	47	52	52	53	76	105	79	52
215	Immunoglobulin mu heavy chain OS=Homo sapiens OX=9606 PE=1 SV=2	IGM_HUMAN	IGM	63 kDa	Homo sapiens	0	795	451	363	358	0	365	288	0	209	0	406	0	0	247	0
216	Vitamin K-dependent protein Z OS=Homo sapiens OX=9606 GN=PROZ PE=1 SV=2	PROZ_HUMAN	PROZ	45 kDa	Homo sapiens	4	0	3	6	8	0	1	4	5	2	9	9	8	7	7	6
217	Immunoglobulin heavy variable 4-28 OS=Homo sapiens OX=9606 GN=IGHV4-28 PE=3 SV=1	HV428_HUMAN	IGHV4-28	13 kDa	Homo sapiens	5	9	0	3	5	8	7	6	9	6	8	4	6	7	9	5
218	Immunoglobulin lambda variable 1-44 OS=Homo sapiens OX=9606 GN=IGLV1-44 PE=1 SV=2	LV144_HUMAN	IGLV1-44	12 kDa	Homo sapiens	4	4	11	6	7	5	0	4	3	2	8	0	2	5	2	6
219	BRCA1-associated RING domain protein 1 OS=Homo sapiens OX=9606 GN=BARD1 PE=1 SV=2	BARD1_HUMAN	BARD1	87 kDa	Homo sapiens	0	0	0	0	0	0	0	0	0	0	0	0	0	2	0	0
220	Immunoglobulin lambda variable 3-25 OS=Homo sapiens OX=9606 GN=IGLV3-25 PE=1 SV=2	LV325_HUMAN	IGLV3-25	12 kDa	Homo sapiens	3	0	0	1	6	3	2	0	5	0	8	0	0	5	4	4
221	Zinc-alpha-2-glycoprotein OS=Homo sapiens OX=9606 GN=AZGP1 PE=1 SV=2	ZA2G_HUMAN	AZGP1	34 kDa	Homo sapiens	8	8	3	13	1	0	3	3	10	2	13	4	4	12	2	3
222	Immunoglobulin kappa variable 2-24 OS=Homo sapiens OX=9606 GN=IGKV2-24 PE=3 SV=1	KV224_HUMAN	IGKV2-24	13 kDa	Homo sapiens	6	6	8	13	4	5	5	3	4	0	4	0	6	6	5	6
223	Apolipoprotein A-II OS=Homo sapiens OX=9606 GN=APOA2 PE=1 SV=1	APOA2_HUMAN	APOA2	11 kDa	Homo sapiens	6	13	24	9	6	5	3	6	4	2	3	2	3	4	5	7
224	Immunoglobulin kappa variable 1-17 OS=Homo sapiens OX=9606 GN=IGKV1-17 PE=1 SV=2	KV117_HUMAN	IGKV1-17	13 kDa	Homo sapiens	5	9	9	9	3	9	4	5	0	6	6	10	2	8	4	8
225	Keratin, type I cytoskeletal 14 OS=Homo sapiens OX=9606 GN=KRT14 PE=1 SV=4	K1C14_HUMAN	KRT14	52 kDa	Homo sapiens	17	14	15	9	12	3	11	4	12	8	0	8	0	6	10	9
226	Immunoglobulin heavy variable 1-46 OS=Homo sapiens OX=9606 GN=IGHV1-46 PE=1 SV=2	HV146_HUMAN	IGHV1-46	13 kDa	Homo sapiens	7	13	5	19	5	4	6	0	21	11	20	11	14	13	12	19
227	Immunoglobulin kappa variable 2-28 OS=Homo sapiens OX=9606 GN=IGKV2-28 PE=3 SV=1	KV228_HUMAN (+1)	IGKV2-28	13 kDa	Homo sapiens	0	0	0	0	0	25	16	0	0	0	33	0	0	21	16	0
228	Serum amyloid A-1 protein OS=Homo sapiens OX=9606 GN=SAA1 PE=1 SV=1	SAA1_HUMAN	SAA1	14 kDa	Homo sapiens	4	9	16	6	0	0	0	0	2	0	8	0	19	7	12	0
229	Cholesteryl ester transfer protein OS=Homo sapiens OX=9606 GN=CETP PE=1 SV=2	CETP_HUMAN	CETP	55 kDa	Homo sapiens	0	2	4	16	8	4	9	11	0	2	9	5	9	2	4	9
230	Tropomyosin alpha-4 chain OS=Homo sapiens OX=9606 GN=TPM4 PE=1 SV=3	TPM4_HUMAN	TPM4	29 kDa	Homo sapiens	14	4	5	4	12	0	0	5	3	0	11	3	14	0	0	2
231	Platelet basic protein OS=Homo sapiens OX=9606 GN=PPBP PE=1 SV=3	CXCL7_HUMAN	PPBP	14 kDa	Homo sapiens	5	4	12	5	7	10	0	11	4	3	6	7	11	8	9	4
232	Tenascin-X OS=Homo sapiens OX=9606 GN=TNXB PE=1 SV=5	TENX_HUMAN	TNXB	458 kDa	Homo sapiens	1	3	2	2	1	0	1	4	0	2	8	1	1	5	2	11
233	Keratin, type I cytoskeletal 16 OS=Homo sapiens OX=9606 GN=KRT16 PE=1 SV=4	K1C16_HUMAN	KRT16	51 kDa	Homo sapiens	9	3	12	4	17	4	12	0	11	1	2	10	6	5	3	0
234	Mannosyl-oligosaccharide 1,2-alpha-mannosidase IA OS=Homo sapiens OX=9606 GN=MAN1A1 PE=1 SV=3	MA1A1_HUMAN	MAN1A1	73 kDa	Homo sapiens	3	1	9	4	2	3	0	2	4	4	4	3	5	4	2	7
235	C-reactive protein OS=Homo sapiens OX=9606 GN=CRP PE=1 SV=1	CRP_HUMAN	CRP	25 kDa	Homo sapiens	0	0	0	0	1	0	0	0	2	6	6	14	27	7	16	8
236	Histone H1.0 OS=Homo sapiens OX=9606 GN=H1F0 PE=1 SV=3	H10_HUMAN	H1F0	21 kDa	Homo sapiens	0	0	0	0	0	0	0	0	0	0	0	0	0	0	0	1
237	Coagulation factor VII OS=Homo sapiens OX=9606 GN=F7 PE=1 SV=1	FA7_HUMAN	F7	52 kDa	Homo sapiens	7	0	5	7	4	1	0	0	8	12	4	4	7	2	6	3
238	AT-rich interactive domain-containing protein 4A OS=Homo sapiens OX=9606 GN=ARID4A PE=1 SV=3	ARI4A_HUMAN	ARID4A	143 kDa	Homo sapiens	2	0	0	0	1	0	0	0	0	0	1	0	1	0	0	0
239	Tubulin beta-1 chain OS=Homo sapiens OX=9606 GN=TUBB1 PE=1 SV=1	TBB1_HUMAN	TUBB1	50 kDa	Homo sapiens	18	0	0	5	4	0	0	4	9	0	8	20	12	0	0	0
240	Band 3 anion transport protein OS=Homo sapiens OX=9606 GN=SLC4A1 PE=1 SV=3	B3AT_HUMAN	SLC4A1	102 kDa	Homo sapiens	8	0	0	2	0	0	3	0	4	5	0	6	7	23	17	0
241	Immunoglobulin heavy variable 2-70D OS=Homo sapiens OX=9606 GN=IGHV2-70D PE=3 SV=1	HV70D_HUMAN	IGHV2-70D	13 kDa	Homo sapiens	6	5	3	8	5	5	3	6	0	2	12	5	10	6	0	7
242	Immunoglobulin heavy variable 3-11 OS=Homo sapiens OX=9606 GN=IGHV3-11 PE=1 SV=2	HV311_HUMAN	IGHV3-11	13 kDa	Homo sapiens	0	39	17	0	19	0	0	20	0	0	14	0	14	0	0	0
243	Fermitin family homolog 3 OS=Homo sapiens OX=9606 GN=FERMT3 PE=1 SV=1	URP2_HUMAN	FERMT3	76 kDa	Homo sapiens	12	0	5	2	9	0	0	2	2	0	2	9	9	10	4	0
244	L-lactate dehydrogenase B chain OS=Homo sapiens OX=9606 GN=LDHB PE=1 SV=2	LDHB_HUMAN	LDHB	37 kDa	Homo sapiens	4	2	2	6	4	7	1	2	0	0	4	2	2	2	4	2
245	Periaxin OS=Homo sapiens OX=9606 GN=PRX PE=1 SV=2	PRAX_HUMAN	PRX	155 kDa	Homo sapiens	0	0	0	3	1	0	0	0	0	0	0	0	0	1	0	0
246	Peroxiredoxin-2 OS=Homo sapiens OX=9606 GN=PRDX2 PE=1 SV=5	PRDX2_HUMAN	PRDX2	22 kDa	Homo sapiens	6	3	8	6	4	0	0	3	0	6	2	4	12	10	8	4
247	Complement factor D OS=Homo sapiens OX=9606 GN=CFD PE=1 SV=5	CFAD_HUMAN	CFD	27 kDa	Homo sapiens	4	5	0	0	0	0	3	0	3	9	2	11	6	25	6	3
248	Hepatocyte growth factor activator OS=Homo sapiens OX=9606 GN=HGFAC PE=1 SV=1	HGFA_HUMAN	HGFAC	71 kDa	Homo sapiens	4	6	0	6	2	1	4	4	5	0	5	2	0	1	3	3
249	Glyceraldehyde-3-phosphate dehydrogenase OS=Homo sapiens OX=9606 GN=GAPDH PE=1 SV=3	G3P_HUMAN	GAPDH	36 kDa	Homo sapiens	9	3	6	4	6	0	1	3	2	1	2	5	10	9	5	3
250	Dynein heavy chain 10, axonemal OS=Homo sapiens OX=9606 GN=DNAH10 PE=1 SV=4	DYH10_HUMAN	DNAH10	515 kDa	Homo sapiens	0	0	0	0	0	0	0	0	1	0	0	0	0	0	0	0
251	Immunoglobulin lambda variable 3-10 OS=Homo sapiens OX=9606 GN=IGLV3-10 PE=3 SV=2	LV310_HUMAN	IGLV3-10	12 kDa	Homo sapiens	0	7	5	0	7	9	0	4	0	0	1	0	3	9	2	0
252	Multimerin-1 OS=Homo sapiens OX=9606 GN=MMRN1 PE=1 SV=3	MMRN1_HUMAN	MMRN1	138 kDa	Homo sapiens	3	1	10	0	0	0	0	3	2	3	3	7	7	5	19	0
253	Pyruvate kinase PKM OS=Homo sapiens OX=9606 GN=PKM PE=1 SV=4	KPYM_HUMAN	PKM	58 kDa	Homo sapiens	7	4	4	8	8	0	0	8	3	0	6	9	7	5	0	0
254	Autophagy-related protein 2 homolog B OS=Homo sapiens OX=9606 GN=ATG2B PE=1 SV=5	ATG2B_HUMAN	ATG2B	233 kDa	Homo sapiens	0	0	2	0	0	0	0	0	0	0	1	2	0	0	0	0
255	Dopamine beta-hydroxylase OS=Homo sapiens OX=9606 GN=DBH PE=1 SV=3	DOPO_HUMAN	DBH	69 kDa	Homo sapiens	6	5	0	9	3	5	0	3	5	6	5	0	0	0	4	0
256	Disabled homolog 2 OS=Homo sapiens OX=9606 GN=DAB2 PE=1 SV=3	DAB2_HUMAN	DAB2	82 kDa	Homo sapiens	0	0	0	0	0	0	0	0	0	0	0	0	0	0	0	1
257	Selenoprotein P OS=Homo sapiens OX=9606 GN=SELENOP PE=1 SV=3	SEPP1_HUMAN	SELENOP	43 kDa	Homo sapiens	5	9	7	5	5	0	0	0	3	3	8	2	5	4	5	0
258	Immunoglobulin heavy variable 1-3 OS=Homo sapiens OX=9606 GN=IGHV1-3 PE=3 SV=1	HV103_HUMAN	IGHV1-3	13 kDa	Homo sapiens	0	0	0	15	8	0	0	10	25	9	21	0	8	15	0	0
259	Transcription initiation factor TFIID subunit 1 OS=Homo sapiens OX=9606 GN=TAF1 PE=1 SV=2	TAF1_HUMAN	TAF1	213 kDa	Homo sapiens	0	0	1	0	0	0	0	0	0	0	1	0	0	1	0	1
260	Immunoglobulin lambda variable 1-40 OS=Homo sapiens OX=9606 GN=IGLV1-40 PE=1 SV=2	LV140_HUMAN	IGLV1-40	12 kDa	Homo sapiens	1	7	9	5	4	7	0	0	0	3	7	0	1	0	0	0
261	Immunoglobulin lambda constant 3 OS=Homo sapiens OX=9606 GN=IGLC3 PE=1 SV=1	IGLC3_HUMAN	IGLC3	11 kDa	Homo sapiens	0	251	0	0	0	0	196	0	0	0	0	0	0	0	0	0
262	Serine/threonine-protein phosphatase 6 regulatory ankyrin repeat subunit A OS=Homo sapiens OX=9606 GN=ANKRD28 PE=1 SV=5	ANR28_HUMAN	ANKRD28	113 kDa	Homo sapiens	0	0	0	0	1	0	0	0	0	0	0	0	0	0	0	0
263	Interferon-induced very large GTPase 1 OS=Homo sapiens OX=9606 GN=GVINP1 PE=2 SV=2	GVIN1_HUMAN	GVINP1	279 kDa	Homo sapiens	0	0	0	3	0	1	0	0	0	0	0	0	0	1	0	0
264	PGAP2-interacting protein OS=Homo sapiens OX=9606 GN=CWH43 PE=2 SV=2	PG2IP_HUMAN	CWH43	79 kDa	Homo sapiens	0	0	0	0	0	0	0	0	2	0	0	0	0	0	0	0
265	Immunoglobulin lambda variable 2-11 OS=Homo sapiens OX=9606 GN=IGLV2-11 PE=1 SV=2	LV211_HUMAN	IGLV2-11	13 kDa	Homo sapiens	2	2	2	0	5	3	4	5	0	0	14	5	0	7	4	4
266	Immunoglobulin heavy variable 4-30-2 OS=Homo sapiens OX=9606 GN=IGHV4-30-2 PE=3 SV=1	HV432_HUMAN	IGHV4-30-2	13 kDa	Homo sapiens	0	0	0	55	0	0	0	0	52	0	67	0	0	0	0	0
267	Tyrosine-protein kinase receptor Tie-1 OS=Homo sapiens OX=9606 GN=TIE1 PE=1 SV=1	TIE1_HUMAN	TIE1	125 kDa	Homo sapiens	0	0	0	0	0	0	0	0	0	1	0	0	0	0	0	0
268	Tenascin OS=Homo sapiens OX=9606 GN=TNC PE=1 SV=3	TENA_HUMAN	TNC	241 kDa	Homo sapiens	0	1	0	0	1	0	0	0	26	0	0	0	0	13	4	0
269	Protein MCM10 homolog OS=Homo sapiens OX=9606 GN=MCM10 PE=1 SV=2	MCM10_HUMAN	MCM10	98 kDa	Homo sapiens	0	0	0	0	0	0	0	0	0	1	0	0	0	3	3	0
270	Immunoglobulin lambda variable 3-1 OS=Homo sapiens OX=9606 GN=IGLV3-1 PE=1 SV=2	LV301_HUMAN	IGLV3-1	12 kDa	Homo sapiens	0	0	0	0	0	0	0	0	0	0	4	0	0	0	0	0
271	Immunoglobulin lambda variable 5-45 OS=Homo sapiens OX=9606 GN=IGLV5-45 PE=3 SV=1	LV545_HUMAN	IGLV5-45	13 kDa	Homo sapiens	0	0	0	0	0	3	0	0	0	0	0	0	0	2	0	2
272	Integrin-linked protein kinase OS=Homo sapiens OX=9606 GN=ILK PE=1 SV=2	ILK_HUMAN	ILK	51 kDa	Homo sapiens	9	0	2	5	4	0	0	3	6	0	0	9	7	3	4	2
273	Immunoglobulin kappa variable 6-21 OS=Homo sapiens OX=9606 GN=IGKV6-21 PE=3 SV=1	KV621_HUMAN	IGKV6-21	12 kDa	Homo sapiens	7	2	4	7	0	0	4	6	3	0	3	3	3	5	4	4
274	Immunoglobulin heavy variable 5-10-1 OS=Homo sapiens OX=9606 GN=IGHV5-10-1 PE=3 SV=1	HV5X1_HUMAN	IGHV5-10-1	13 kDa	Homo sapiens	0	0	0	0	0	1	0	0	6	0	15	0	0	7	0	0
275	Protein S100-A9 OS=Homo sapiens OX=9606 GN=S100A9 PE=1 SV=1	S10A9_HUMAN	S100A9	13 kDa	Homo sapiens	0	5	3	0	0	4	0	3	3	0	0	4	3	5	6	0
276	Immunoglobulin lambda variable 3-19 OS=Homo sapiens OX=9606 GN=IGLV3-19 PE=1 SV=2	LV319_HUMAN	IGLV3-19	12 kDa	Homo sapiens	0	3	0	7	5	0	1	0	3	0	14	2	0	0	2	4
277	E3 ubiquitin-protein ligase HERC2 OS=Homo sapiens OX=9606 GN=HERC2 PE=1 SV=2	HERC2_HUMAN	HERC2	527 kDa	Homo sapiens	2	0	0	1	0	0	0	0	0	0	2	0	2	0	0	0
278	Complement factor H-related protein 5 OS=Homo sapiens OX=9606 GN=CFHR5 PE=1 SV=1	FHR5_HUMAN	CFHR5	64 kDa	Homo sapiens	0	0	0	5	8	10	10	10	6	8	7	10	0	7	0	6
279	Tubulin beta chain OS=Homo sapiens OX=9606 GN=TUBB PE=1 SV=2	TBB5_HUMAN	TUBB	50 kDa	Homo sapiens	13	3	0	9	9	0	0	3	3	0	3	17	15	4	0	0
280	Rho GTPase-activating protein 21 OS=Homo sapiens OX=9606 GN=ARHGAP21 PE=1 SV=2	RHG21_HUMAN	ARHGAP21	217 kDa	Homo sapiens	0	0	0	0	0	2	0	0	0	0	0	0	2	1	0	0
281	Alpha-actinin-1 OS=Homo sapiens OX=9606 GN=ACTN1 PE=1 SV=2	ACTN1_HUMAN	ACTN1	103 kDa	Homo sapiens	5	0	0	0	13	0	5	9	0	0	2	10	4	0	0	0
282	Immunoglobulin heavy variable 6-1 OS=Homo sapiens OX=9606 GN=IGHV6-1 PE=3 SV=1	HV601_HUMAN	IGHV6-1	13 kDa	Homo sapiens	0	1	1	2	1	3	0	0	2	1	1	2	0	0	1	3
283	Fetuin-B OS=Homo sapiens OX=9606 GN=FETUB PE=1 SV=2	FETUB_HUMAN	FETUB	42 kDa	Homo sapiens	3	2	9	1	6	5	7	1	0	3	0	4	2	0	0	3
284	Mannan-binding lectin serine protease 2 OS=Homo sapiens OX=9606 GN=MASP2 PE=1 SV=4	MASP2_HUMAN	MASP2	76 kDa	Homo sapiens	4	2	0	3	0	0	3	0	0	0	4	0	2	4	1	0
285	14-3-3 protein zeta/delta OS=Homo sapiens OX=9606 GN=YWHAZ PE=1 SV=1	1433Z_HUMAN	YWHAZ	28 kDa	Homo sapiens	5	0	0	0	4	0	0	0	5	0	4	3	7	7	3	0
286	Protein Shroom3 OS=Homo sapiens OX=9606 GN=SHROOM3 PE=1 SV=2	SHRM3_HUMAN	SHROOM3	217 kDa	Homo sapiens	0	0	0	0	0	0	0	1	2	0	0	0	0	0	0	0
287	Beta-parvin OS=Homo sapiens OX=9606 GN=PARVB PE=1 SV=1	PARVB_HUMAN	PARVB	42 kDa	Homo sapiens	11	0	4	0	3	0	0	0	0	0	2	6	5	6	3	0
288	Cathelicidin antimicrobial peptide OS=Homo sapiens OX=9606 GN=CAMP PE=1 SV=1	CAMP_HUMAN	CAMP	19 kDa	Homo sapiens	0	0	0	0	0	0	0	0	0	0	0	0	0	0	4	0
289	Multiple inositol polyphosphate phosphatase 1 OS=Homo sapiens OX=9606 GN=MINPP1 PE=1 SV=1	MINP1_HUMAN	MINPP1	55 kDa	Homo sapiens	0	0	6	3	0	0	0	4	0	0	0	0	0	0	5	3
290	Telomere-associated protein RIF1 OS=Homo sapiens OX=9606 GN=RIF1 PE=1 SV=2	RIF1_HUMAN	RIF1	274 kDa	Homo sapiens	2	0	0	0	0	0	0	0	0	0	0	0	2	0	0	0
291	Serine/threonine-protein phosphatase 1 regulatory subunit 10 OS=Homo sapiens OX=9606 GN=PPP1R10 PE=1 SV=1	PP1RA_HUMAN	PPP1R10	99 kDa	Homo sapiens	0	0	5	1	0	1	1	0	0	0	1	0	1	0	3	2
292	Serine/threonine-protein kinase/endoribonuclease IRE1 OS=Homo sapiens OX=9606 GN=ERN1 PE=1 SV=2	ERN1_HUMAN	ERN1	110 kDa	Homo sapiens	0	0	0	0	0	0	0	0	0	0	0	1	3	0	0	0
293	Beta-2-microglobulin OS=Homo sapiens OX=9606 GN=B2M PE=1 SV=1	B2MG_HUMAN	B2M	14 kDa	Homo sapiens	0	0	0	0	0	0	0	0	0	0	0	0	0	9	0	0
294	Huntingtin OS=Homo sapiens OX=9606 GN=HTT PE=1 SV=2	HD_HUMAN	HTT	348 kDa	Homo sapiens	2	0	2	0	2	0	4	0	0	0	4	0	0	0	0	0
295	Complement C1r subcomponent-like protein OS=Homo sapiens OX=9606 GN=C1RL PE=1 SV=2	C1RL_HUMAN	C1RL	53 kDa	Homo sapiens	9	7	0	0	0	0	0	0	13	10	12	9	0	0	11	9
296	Keratin, type II cytoskeletal 5 OS=Homo sapiens OX=9606 GN=KRT5 PE=1 SV=3	K2C5_HUMAN	KRT5	62 kDa	Homo sapiens	10	16	0	0	0	0	9	0	8	5	0	6	0	4	10	5
297	Immunoglobulin heavy variable 3-20 OS=Homo sapiens OX=9606 GN=IGHV3-20 PE=3 SV=2	HV320_HUMAN	IGHV3-20	13 kDa	Homo sapiens	0	0	0	0	0	0	0	11	17	0	11	0	0	0	0	0
298	Catalase OS=Homo sapiens OX=9606 GN=CAT PE=1 SV=3	CATA_HUMAN	CAT	60 kDa	Homo sapiens	3	0	3	0	0	0	0	0	2	1	0	0	7	12	9	0
299	Immunoglobulin kappa variable 1-13 OS=Homo sapiens OX=9606 GN=IGKV1-13 PE=3 SV=1	KV113_HUMAN (+1)	IGKV1-13	13 kDa	Homo sapiens	0	0	0	0	0	7	0	0	1	0	0	0	4	0	0	0
300	Keratin, type II cytoskeletal 6B OS=Homo sapiens OX=9606 GN=KRT6B PE=1 SV=5	K2C6B_HUMAN	KRT6B	60 kDa	Homo sapiens	16	0	15	0	18	10	13	0	15	0	8	10	0	0	14	0
301	Lumican OS=Homo sapiens OX=9606 GN=LUM PE=1 SV=2	LUM_HUMAN	LUM	38 kDa	Homo sapiens	0	5	0	0	0	3	0	1	0	4	3	2	0	6	0	3
302	Teashirt homolog 2 OS=Homo sapiens OX=9606 GN=TSHZ2 PE=1 SV=3	TSH2_HUMAN	TSHZ2	115 kDa	Homo sapiens	0	0	0	0	3	0	3	0	0	0	0	0	0	0	0	0
303	Spectrin beta chain, non-erythrocytic 4 OS=Homo sapiens OX=9606 GN=SPTBN4 PE=1 SV=2	SPTN4_HUMAN	SPTBN4	289 kDa	Homo sapiens	0	1	0	0	1	0	1	0	0	0	0	0	0	0	0	0
304	Nascent polypeptide-associated complex subunit alpha, muscle-specific form OS=Homo sapiens OX=9606 GN=NACA PE=1 SV=1	NACAM_HUMAN	NACA	205 kDa	Homo sapiens	0	0	0	1	0	0	0	0	0	0	1	0	0	0	0	3
305	Anthrax toxin receptor 2 OS=Homo sapiens OX=9606 GN=ANTXR2 PE=1 SV=5	ANTR2_HUMAN	ANTXR2	54 kDa	Homo sapiens	0	0	0	0	0	0	0	0	0	0	0	0	0	0	8	0
306	Cofilin-1 OS=Homo sapiens OX=9606 GN=CFL1 PE=1 SV=3	COF1_HUMAN	CFL1	19 kDa	Homo sapiens	4	2	3	0	2	0	0	0	0	0	2	4	6	9	4	1
307	Ankyrin-3 OS=Homo sapiens OX=9606 GN=ANK3 PE=1 SV=3	ANK3_HUMAN	ANK3	480 kDa	Homo sapiens	0	0	0	0	1	0	1	1	0	0	0	0	0	0	0	0
308	Purine nucleoside phosphorylase OS=Homo sapiens OX=9606 GN=PNP PE=1 SV=2	PNPH_HUMAN	PNP	32 kDa	Homo sapiens	7	3	0	3	0	0	0	0	0	0	0	3	8	0	6	0
309	Erythrocyte band 7 integral membrane protein OS=Homo sapiens OX=9606 GN=STOM PE=1 SV=3	STOM_HUMAN	STOM	32 kDa	Homo sapiens	3	0	6	0	0	0	0	0	1	0	0	3	8	11	8	0
310	Immunoglobulin lambda constant 7 OS=Homo sapiens OX=9606 GN=IGLC7 PE=1 SV=3	IGLC7_HUMAN	IGLC7	11 kDa	Homo sapiens	0	0	0	0	0	0	0	0	66	0	106	0	0	0	0	0
311	Immunoglobulin lambda variable 3-9 OS=Homo sapiens OX=9606 GN=IGLV3-9 PE=3 SV=1	LV39_HUMAN	IGLV3-9	12 kDa	Homo sapiens	0	0	0	34	0	0	0	0	0	0	0	0	0	0	0	0
312	Immunoglobulin heavy variable 3-33 OS=Homo sapiens OX=9606 GN=IGHV3-33 PE=1 SV=2	HV333_HUMAN	IGHV3-33	13 kDa	Homo sapiens	0	34	0	29	0	0	0	0	48	39	0	0	0	0	0	0
313	Ras-related protein Rap-1b OS=Homo sapiens OX=9606 GN=RAP1B PE=1 SV=1	RAP1B_HUMAN	RAP1B	21 kDa	Homo sapiens	6	0	0	2	0	0	0	0	6	0	0	3	6	7	0	2
314	Ribonuclease pancreatic OS=Homo sapiens OX=9606 GN=RNASE1 PE=1 SV=4	RNAS1_HUMAN	RNASE1	18 kDa	Homo sapiens	0	0	0	0	0	0	0	0	0	0	0	0	0	12	0	0
315	Immunoglobulin lambda variable 9-49 OS=Homo sapiens OX=9606 GN=IGLV9-49 PE=1 SV=1	LV949_HUMAN	IGLV9-49	13 kDa	Homo sapiens	0	1	3	1	0	0	0	2	2	0	4	0	0	0	0	2
316	Obscurin OS=Homo sapiens OX=9606 GN=OBSCN PE=1 SV=3	OBSCN_HUMAN	OBSCN	868 kDa	Homo sapiens	0	1	0	0	0	2	0	0	0	0	0	0	0	0	0	0
317	Immunoglobulin lambda variable 2-18 OS=Homo sapiens OX=9606 GN=IGLV2-18 PE=3 SV=2	LV218_HUMAN	IGLV2-18	12 kDa	Homo sapiens	0	0	0	3	3	5	0	6	4	0	1	0	0	0	0	0
318	Extracellular matrix protein 1 OS=Homo sapiens OX=9606 GN=ECM1 PE=1 SV=2	ECM1_HUMAN	ECM1	61 kDa	Homo sapiens	0	0	0	1	3	1	10	2	0	0	5	0	0	0	0	3
319	Zinc finger protein 177 OS=Homo sapiens OX=9606 GN=ZNF177 PE=1 SV=4	ZN177_HUMAN	ZNF177	55 kDa	Homo sapiens	0	0	0	0	0	0	0	0	0	0	0	0	0	0	1	0
320	SUN domain-containing ossification factor OS=Homo sapiens OX=9606 GN=SUCO PE=1 SV=1	SUCO_HUMAN	SUCO	139 kDa	Homo sapiens	0	0	0	0	2	3	0	0	0	0	0	0	0	0	0	0
321	FH1/FH2 domain-containing protein 3 OS=Homo sapiens OX=9606 GN=FHOD3 PE=1 SV=2	FHOD3_HUMAN	FHOD3	159 kDa	Homo sapiens	0	0	0	0	0	0	1	0	0	0	0	0	0	0	1	0
322	Complement factor H-related protein 2 OS=Homo sapiens OX=9606 GN=CFHR2 PE=1 SV=1	FHR2_HUMAN	CFHR2	31 kDa	Homo sapiens	19	11	12	5	0	15	0	12	12	12	0	13	0	10	14	14
323	Thrombospondin-4 OS=Homo sapiens OX=9606 GN=THBS4 PE=1 SV=2	TSP4_HUMAN	THBS4	106 kDa	Homo sapiens	0	3	0	3	0	0	0	4	1	5	0	4	0	0	2	7
324	Histone deacetylase 5 OS=Homo sapiens OX=9606 GN=HDAC5 PE=1 SV=2	HDAC5_HUMAN	HDAC5	122 kDa	Homo sapiens	0	0	0	0	0	0	0	0	0	0	0	0	0	0	1	0
325	Lysozyme C OS=Homo sapiens OX=9606 GN=LYZ PE=1 SV=1	LYSC_HUMAN	LYZ	17 kDa	Homo sapiens	4	4	0	0	0	0	0	0	0	0	0	0	2	7	0	0
326	Collectin-11 OS=Homo sapiens OX=9606 GN=COLEC11 PE=1 SV=1	COL11_HUMAN	COLEC11	29 kDa	Homo sapiens	2	0	0	1	0	0	0	0	4	1	0	2	0	2	1	2
327	Tubulin alpha-1B chain OS=Homo sapiens OX=9606 GN=TUBA1B PE=1 SV=1	TBA1B_HUMAN	TUBA1B	50 kDa	Homo sapiens	5	2	0	0	3	0	0	0	2	0	0	5	5	0	0	0
328	Immunoglobulin heavy variable 4-4 OS=Homo sapiens OX=9606 GN=IGHV4-4 PE=3 SV=2	HV404_HUMAN	IGHV4-4	13 kDa	Homo sapiens	0	0	0	53	46	0	33	42	51	0	0	0	0	0	0	0
329	TBC1 domain family member 22A OS=Homo sapiens OX=9606 GN=TBC1D22A PE=1 SV=2	TB22A_HUMAN	TBC1D22A	59 kDa	Homo sapiens	1	0	0	0	0	0	0	0	0	0	0	0	0	0	0	0
330	Collagen alpha-3(VI) chain OS=Homo sapiens OX=9606 GN=COL6A3 PE=1 SV=5	CO6A3_HUMAN	COL6A3	344 kDa	Homo sapiens	0	1	1	0	0	0	0	0	0	2	0	5	0	1	1	0
331	Immunoglobulin kappa variable 2D-29 OS=Homo sapiens OX=9606 GN=IGKV2D-29 PE=3 SV=1	KVD29_HUMAN	IGKV2D-29	13 kDa	Homo sapiens	0	0	0	0	0	0	0	0	0	0	16	0	0	0	0	0
332	Apolipoprotein A-V OS=Homo sapiens OX=9606 GN=APOA5 PE=1 SV=1	APOA5_HUMAN	APOA5	41 kDa	Homo sapiens	2	0	2	0	0	0	0	0	2	0	3	4	0	0	6	5
333	Dynein heavy chain 3, axonemal OS=Homo sapiens OX=9606 GN=DNAH3 PE=2 SV=1	DYH3_HUMAN	DNAH3	471 kDa	Homo sapiens	0	0	0	0	0	0	0	0	0	0	0	0	0	0	0	1
334	Lactotransferrin OS=Homo sapiens OX=9606 GN=LTF PE=1 SV=6	TRFL_HUMAN	LTF	78 kDa	Homo sapiens	0	0	0	0	1	9	0	0	0	0	0	0	0	0	0	0
335	Proliferation marker protein Ki-67 OS=Homo sapiens OX=9606 GN=MKI67 PE=1 SV=2	KI67_HUMAN	MKI67	359 kDa	Homo sapiens	0	0	0	2	0	0	0	0	0	0	0	0	0	0	1	0
336	Immunoglobulin lambda variable 6-57 OS=Homo sapiens OX=9606 GN=IGLV6-57 PE=1 SV=2	LV657_HUMAN	IGLV6-57	13 kDa	Homo sapiens	0	0	0	0	0	0	1	0	0	0	0	0	0	0	0	2
337	Transgelin-2 OS=Homo sapiens OX=9606 GN=TAGLN2 PE=1 SV=3	TAGL2_HUMAN	TAGLN2	22 kDa	Homo sapiens	4	6	0	0	1	0	0	0	3	0	3	5	4	0	3	2
338	Apolipoprotein F OS=Homo sapiens OX=9606 GN=APOF PE=1 SV=2	APOF_HUMAN	APOF	35 kDa	Homo sapiens	3	0	0	1	2	0	2	0	4	4	2	0	0	3	2	0
339	Angiopoietin-related protein 6 OS=Homo sapiens OX=9606 GN=ANGPTL6 PE=1 SV=1	ANGL6_HUMAN	ANGPTL6	52 kDa	Homo sapiens	0	0	0	0	5	0	0	0	0	0	0	0	0	6	0	0
340	Brefeldin A-inhibited guanine nucleotide-exchange protein 3 OS=Homo sapiens OX=9606 GN=ARFGEF3 PE=1 SV=3	BIG3_HUMAN	ARFGEF3	241 kDa	Homo sapiens	0	0	0	0	0	1	0	0	0	0	0	0	0	2	0	0
341	Adenylyl cyclase-associated protein 1 OS=Homo sapiens OX=9606 GN=CAP1 PE=1 SV=5	CAP1_HUMAN	CAP1	52 kDa	Homo sapiens	5	0	2	2	2	0	0	0	0	0	2	6	2	0	0	0
342	Cyclin-dependent kinase 19 OS=Homo sapiens OX=9606 GN=CDK19 PE=1 SV=1	CDK19_HUMAN	CDK19	57 kDa	Homo sapiens	0	0	0	0	0	0	0	0	1	0	0	0	0	0	0	0
343	Spectrin alpha chain, erythrocytic 1 OS=Homo sapiens OX=9606 GN=SPTA1 PE=1 SV=5	SPTA1_HUMAN	SPTA1	280 kDa	Homo sapiens	0	0	0	0	0	0	0	1	0	1	0	0	0	2	0	0
344	Semaphorin-6D OS=Homo sapiens OX=9606 GN=SEMA6D PE=1 SV=1	SEM6D_HUMAN	SEMA6D	120 kDa	Homo sapiens	0	0	0	0	0	0	0	0	3	0	0	0	0	0	0	0
345	Tyrosine-protein phosphatase non-receptor type substrate 1 OS=Homo sapiens OX=9606 GN=SIRPA PE=1 SV=2	SHPS1_HUMAN	SIRPA	55 kDa	Homo sapiens	0	0	0	0	1	0	0	0	0	0	0	0	0	0	0	0
346	Hemoglobin subunit gamma-1 OS=Homo sapiens OX=9606 GN=HBG1 PE=1 SV=2	HBG1_HUMAN	HBG1	16 kDa	Homo sapiens	0	0	0	0	0	0	0	0	0	0	0	0	14	23	0	16
347	Fibronectin type III domain-containing protein 1 OS=Homo sapiens OX=9606 GN=FNDC1 PE=2 SV=4	FNDC1_HUMAN	FNDC1	206 kDa	Homo sapiens	0	0	0	0	0	0	0	0	0	0	0	1	0	0	1	0
348	Immunoglobulin kappa variable 2-30 OS=Homo sapiens OX=9606 GN=IGKV2-30 PE=3 SV=2	KV230_HUMAN	IGKV2-30	13 kDa	Homo sapiens	0	16	9	20	10	22	0	0	0	0	0	0	0	0	0	0
349	Transcription termination factor 2 OS=Homo sapiens OX=9606 GN=TTF2 PE=1 SV=2	TTF2_HUMAN	TTF2	130 kDa	Homo sapiens	0	0	0	0	0	0	0	0	0	0	0	0	0	1	0	0
350	Integrin alpha-IIb OS=Homo sapiens OX=9606 GN=ITGA2B PE=1 SV=3	ITA2B_HUMAN	ITGA2B	113 kDa	Homo sapiens	3	0	0	0	0	0	0	0	3	0	0	3	4	5	0	0
351	Hornerin OS=Homo sapiens OX=9606 GN=HRNR PE=1 SV=2	HORN_HUMAN	HRNR	282 kDa	Homo sapiens	10	0	0	0	0	0	0	0	2	0	0	0	0	2	0	0
352	Peroxiredoxin-6 OS=Homo sapiens OX=9606 GN=PRDX6 PE=1 SV=3	PRDX6_HUMAN	PRDX6	25 kDa	Homo sapiens	6	3	1	0	2	0	0	0	2	0	1	0	3	3	4	0
353	Latent-transforming growth factor beta-binding protein 1 OS=Homo sapiens OX=9606 GN=LTBP1 PE=1 SV=4	LTBP1_HUMAN	LTBP1	187 kDa	Homo sapiens	0	0	3	0	0	0	0	1	2	0	0	4	3	3	3	0
354	Protein S100-A8 OS=Homo sapiens OX=9606 GN=S100A8 PE=1 SV=1	S10A8_HUMAN	S100A8	11 kDa	Homo sapiens	0	0	0	0	0	0	0	0	0	0	0	0	6	3	7	0
355	Collagen alpha-1(XVIII) chain OS=Homo sapiens OX=9606 GN=COL18A1 PE=1 SV=5	COIA1_HUMAN	COL18A1	178 kDa	Homo sapiens	0	1	0	0	0	0	0	0	1	2	0	0	0	9	0	0
356	Rab GDP dissociation inhibitor beta OS=Homo sapiens OX=9606 GN=GDI2 PE=1 SV=2	GDIB_HUMAN	GDI2	51 kDa	Homo sapiens	5	0	0	0	0	0	0	0	0	0	0	0	3	2	3	0
357	Brevican core protein OS=Homo sapiens OX=9606 GN=BCAN PE=1 SV=2	PGCB_HUMAN	BCAN	99 kDa	Homo sapiens	0	0	1	0	0	0	0	0	0	0	0	0	0	0	0	1
358	TRMT1-like protein OS=Homo sapiens OX=9606 GN=TRMT1L PE=1 SV=2	TRM1L_HUMAN	TRMT1L	82 kDa	Homo sapiens	0	0	0	1	0	0	0	0	0	0	0	0	0	0	0	0
359	Ribonuclease 4 OS=Homo sapiens OX=9606 GN=RNASE4 PE=1 SV=3	RNAS4_HUMAN	RNASE4	17 kDa	Homo sapiens	0	0	0	0	0	0	0	0	0	0	0	0	0	7	0	0
360	Calreticulin OS=Homo sapiens OX=9606 GN=CALR PE=1 SV=1	CALR_HUMAN	CALR	48 kDa	Homo sapiens	1	0	0	0	2	0	0	0	0	0	1	0	2	2	0	1
361	Keratin, type I cuticular Ha3-II OS=Homo sapiens OX=9606 GN=KRT33B PE=1 SV=3	KT33B_HUMAN	KRT33B	46 kDa	Homo sapiens	0	0	0	0	0	0	0	0	7	0	0	0	0	0	0	20
362	Immunoglobulin lambda variable 3-27 OS=Homo sapiens OX=9606 GN=IGLV3-27 PE=1 SV=2	LV327_HUMAN	IGLV3-27	12 kDa	Homo sapiens	0	0	0	0	0	0	0	0	7	0	0	0	0	0	0	0
363	Integrin beta-3 OS=Homo sapiens OX=9606 GN=ITGB3 PE=1 SV=2	ITB3_HUMAN	ITGB3	87 kDa	Homo sapiens	2	0	0	0	0	0	0	0	0	0	0	2	1	5	0	0
364	Nebulin OS=Homo sapiens OX=9606 GN=NEB PE=1 SV=5	NEBU_HUMAN	NEB	773 kDa	Homo sapiens	0	0	1	0	0	0	0	0	0	0	0	0	1	0	0	0
365	Immunoglobulin heavy variable 1-8 OS=Homo sapiens OX=9606 GN=IGHV1-8 PE=3 SV=1	HV108_HUMAN	IGHV1-8	13 kDa	Homo sapiens	0	11	0	0	0	0	0	9	0	0	17	0	0	0	0	0
366	Adhesion G-protein coupled receptor V1 OS=Homo sapiens OX=9606 GN=ADGRV1 PE=1 SV=2	AGRV1_HUMAN	ADGRV1	693 kDa	Homo sapiens	0	0	0	0	0	0	1	0	0	0	0	0	0	0	0	0
367	Advillin OS=Homo sapiens OX=9606 GN=AVIL PE=1 SV=3	AVIL_HUMAN	AVIL	92 kDa	Homo sapiens	0	0	0	0	1	0	0	0	0	0	0	0	0	0	0	0
368	Nesprin-2 OS=Homo sapiens OX=9606 GN=SYNE2 PE=1 SV=3	SYNE2_HUMAN	SYNE2	796 kDa	Homo sapiens	0	0	0	0	1	0	0	0	0	0	0	0	0	0	0	0
369	Procollagen C-endopeptidase enhancer 1 OS=Homo sapiens OX=9606 GN=PCOLCE PE=1 SV=2	PCOC1_HUMAN	PCOLCE	48 kDa	Homo sapiens	2	0	0	0	0	0	0	0	0	4	0	0	0	2	0	0
370	Protein piccolo OS=Homo sapiens OX=9606 GN=PCLO PE=1 SV=5	PCLO_HUMAN	PCLO	561 kDa	Homo sapiens	0	0	0	0	0	0	0	0	0	0	0	0	0	1	0	0
371	Immunoglobulin lambda constant 6 OS=Homo sapiens OX=9606 GN=IGLC6 PE=1 SV=1	IGLC6_HUMAN	IGLC6	11 kDa	Homo sapiens	0	0	0	0	136	0	132	0	0	0	0	0	0	0	0	0
372	Synergin gamma OS=Homo sapiens OX=9606 GN=SYNRG PE=1 SV=2	SYNRG_HUMAN	SYNRG	141 kDa	Homo sapiens	0	0	0	0	0	0	0	0	0	0	0	0	0	0	0	2
373	Endoplasmic reticulum chaperone BiP OS=Homo sapiens OX=9606 GN=HSPA5 PE=1 SV=2	BIP_HUMAN	HSPA5	72 kDa	Homo sapiens	0	0	4	1	1	0	0	0	2	0	0	1	1	0	0	3
374	Plastin-2 OS=Homo sapiens OX=9606 GN=LCP1 PE=1 SV=6	PLSL_HUMAN	LCP1	70 kDa	Homo sapiens	1	2	0	0	0	1	0	0	1	0	0	0	0	1	0	0
375	Protein sidekick-1 OS=Homo sapiens OX=9606 GN=SDK1 PE=2 SV=3	SDK1_HUMAN	SDK1	242 kDa	Homo sapiens	0	1	0	0	0	0	0	0	0	1	0	0	0	2	0	0
376	Laminin subunit alpha-3 OS=Homo sapiens OX=9606 GN=LAMA3 PE=1 SV=2	LAMA3_HUMAN	LAMA3	367 kDa	Homo sapiens	0	0	0	0	0	0	0	0	0	0	0	0	0	0	0	1
377	Zinc finger protein 407 OS=Homo sapiens OX=9606 GN=ZNF407 PE=1 SV=2	ZN407_HUMAN	ZNF407	247 kDa	Homo sapiens	0	0	0	0	0	0	0	0	0	0	0	0	0	0	1	0
378	Protocadherin alpha-3 OS=Homo sapiens OX=9606 GN=PCDHA3 PE=2 SV=1	PCDA3_HUMAN	PCDHA3	102 kDa	Homo sapiens	1	0	0	0	0	0	0	0	0	0	0	0	0	0	0	0
379	Angiogenin OS=Homo sapiens OX=9606 GN=ANG PE=1 SV=1	ANGI_HUMAN	ANG	17 kDa	Homo sapiens	0	0	3	3	0	0	1	2	0	0	0	0	0	3	0	0
380	Nesprin-1 OS=Homo sapiens OX=9606 GN=SYNE1 PE=1 SV=4	SYNE1_HUMAN	SYNE1	1011 kDa	Homo sapiens	0	1	0	0	0	0	0	0	0	0	0	0	0	0	0	0
381	Nuclear body protein SP140-like protein OS=Homo sapiens OX=9606 GN=SP140L PE=1 SV=3	SP14L_HUMAN	SP140L	67 kDa	Homo sapiens	0	0	0	0	0	0	0	0	0	0	0	0	0	1	0	0
382	Fructose-bisphosphate aldolase B OS=Homo sapiens OX=9606 GN=ALDOB PE=1 SV=2	ALDOB_HUMAN	ALDOB	39 kDa	Homo sapiens	0	4	0	0	0	0	0	0	0	0	0	0	0	0	0	1
383	Insulin-like growth factor-binding protein 2 OS=Homo sapiens OX=9606 GN=IGFBP2 PE=1 SV=2	IBP2_HUMAN	IGFBP2	35 kDa	Homo sapiens	0	0	0	0	0	0	0	0	0	4	0	0	0	3	2	0
384	Peptidyl-prolyl cis-trans isomerase A OS=Homo sapiens OX=9606 GN=PPIA PE=1 SV=2	PPIA_HUMAN	PPIA	18 kDa	Homo sapiens	4	0	0	0	0	0	0	0	0	0	0	0	6	4	0	0
385	B-cell CLL/lymphoma 9-like protein OS=Homo sapiens OX=9606 GN=BCL9L PE=1 SV=1	BCL9L_HUMAN	BCL9L	157 kDa	Homo sapiens	0	0	0	0	0	0	0	0	0	1	0	1	0	0	0	0
386	1-phosphatidylinositol 4,5-bisphosphate phosphodiesterase eta-1 OS=Homo sapiens OX=9606 GN=PLCH1 PE=1 SV=1	PLCH1_HUMAN	PLCH1	189 kDa	Homo sapiens	0	0	0	0	0	0	0	0	0	0	0	1	0	0	0	0
387	Immunoglobulin lambda variable 4-60 OS=Homo sapiens OX=9606 GN=IGLV4-60 PE=3 SV=1	LV460_HUMAN	IGLV4-60	13 kDa	Homo sapiens	0	0	3	0	0	0	0	0	0	0	0	0	2	0	0	3
388	Actin-related protein 3 OS=Homo sapiens OX=9606 GN=ACTR3 PE=1 SV=3	ARP3_HUMAN	ACTR3	47 kDa	Homo sapiens	2	0	1	0	2	0	0	2	0	0	0	0	0	0	0	0
389	Zinc finger protein 594 OS=Homo sapiens OX=9606 GN=ZNF594 PE=2 SV=3	ZN594_HUMAN	ZNF594	94 kDa	Homo sapiens	0	0	0	0	0	0	0	1	0	0	0	0	0	1	0	0
390	Dynein heavy chain 17, axonemal OS=Homo sapiens OX=9606 GN=DNAH17 PE=1 SV=3	DYH17_HUMAN	DNAH17	509 kDa	Homo sapiens	0	0	0	0	2	0	0	0	0	0	0	0	0	0	0	0
391	Immunoglobulin lambda variable 2-8 OS=Homo sapiens OX=9606 GN=IGLV2-8 PE=1 SV=2	LV208_HUMAN	IGLV2-8	12 kDa	Homo sapiens	0	0	4	0	0	6	0	0	0	0	0	0	0	0	0	0
392	Protein mono-ADP-ribosyltransferase PARP8 OS=Homo sapiens OX=9606 GN=PARP8 PE=1 SV=1	PARP8_HUMAN	PARP8	96 kDa	Homo sapiens	0	0	1	0	0	0	0	0	0	0	0	0	0	0	0	0
393	Basement membrane-specific heparan sulfate proteoglycan core protein OS=Homo sapiens OX=9606 GN=HSPG2 PE=1 SV=4	PGBM_HUMAN	HSPG2	469 kDa	Homo sapiens	0	0	0	0	0	0	0	0	0	0	0	0	0	1	1	0
394	Serum paraoxonase/lactonase 3 OS=Homo sapiens OX=9606 GN=PON3 PE=1 SV=3	PON3_HUMAN	PON3	40 kDa	Homo sapiens	0	0	7	11	0	0	0	0	0	0	0	0	0	0	0	0
395	Centrosomal protein of 290 kDa OS=Homo sapiens OX=9606 GN=CEP290 PE=1 SV=2	CE290_HUMAN	CEP290	290 kDa	Homo sapiens	0	0	0	0	0	0	1	0	0	0	0	0	0	0	0	0
396	Keratin, type I cuticular Ha1 OS=Homo sapiens OX=9606 GN=KRT31 PE=1 SV=3	K1H1_HUMAN	KRT31	47 kDa	Homo sapiens	0	0	0	0	0	0	0	0	9	0	0	0	0	0	0	20
397	Platelet factor 4 variant OS=Homo sapiens OX=9606 GN=PF4V1 PE=1 SV=1	PF4V_HUMAN	PF4V1	12 kDa	Homo sapiens	0	0	0	0	0	0	0	0	0	0	0	0	0	9	0	0
398	Insulin-like growth factor-binding protein 3 OS=Homo sapiens OX=9606 GN=IGFBP3 PE=1 SV=2	IBP3_HUMAN	IGFBP3	32 kDa	Homo sapiens	0	0	0	2	0	0	0	0	0	0	0	3	0	0	0	0
399	Cardiomyopathy-associated protein 5 OS=Homo sapiens OX=9606 GN=CMYA5 PE=1 SV=3	CMYA5_HUMAN	CMYA5	449 kDa	Homo sapiens	0	0	1	0	0	0	0	0	0	1	0	0	0	0	0	0
400	Immunoglobulin lambda variable 1-36 OS=Homo sapiens OX=9606 GN=IGLV1-36 PE=1 SV=5	LV136_HUMAN	IGLV1-36	12 kDa	Homo sapiens	0	0	0	0	0	3	0	0	0	0	7	0	0	0	0	0
401	SH3 and multiple ankyrin repeat domains protein 1 OS=Homo sapiens OX=9606 GN=SHANK1 PE=1 SV=2	SHAN1_HUMAN	SHANK1	225 kDa	Homo sapiens	0	2	0	0	1	0	0	0	0	0	0	0	0	0	0	0
402	Secretogranin-2 OS=Homo sapiens OX=9606 GN=SCG2 PE=1 SV=2	SCG2_HUMAN	SCG2	71 kDa	Homo sapiens	0	0	0	0	0	0	0	0	0	0	0	0	0	0	1	0
403	AT-rich interactive domain-containing protein 1B OS=Homo sapiens OX=9606 GN=ARID1B PE=1 SV=2	ARI1B_HUMAN	ARID1B	236 kDa	Homo sapiens	0	0	0	0	0	0	0	0	0	0	0	0	0	0	1	0
404	Teneurin-1 OS=Homo sapiens OX=9606 GN=TENM1 PE=1 SV=2	TEN1_HUMAN	TENM1	305 kDa	Homo sapiens	5	0	0	0	0	0	0	0	1	0	1	0	0	0	0	0
405	eIF-2-alpha kinase activator GCN1 OS=Homo sapiens OX=9606 GN=GCN1 PE=1 SV=6	GCN1_HUMAN	GCN1	293 kDa	Homo sapiens	0	0	0	0	0	0	0	0	0	0	0	1	0	0	0	0
406	Immunoglobulin heavy variable 3-43D OS=Homo sapiens OX=9606 GN=IGHV3-43D PE=3 SV=1	HV43D_HUMAN	IGHV3-43D	13 kDa	Homo sapiens	0	0	0	0	0	0	0	0	0	0	47	0	0	0	0	0
407	Dynein heavy chain 12, axonemal OS=Homo sapiens OX=9606 GN=DNAH12 PE=2 SV=2	DYH12_HUMAN	DNAH12	357 kDa	Homo sapiens	0	0	0	0	0	0	0	0	0	0	0	0	1	0	0	0
408	Desmoplakin OS=Homo sapiens OX=9606 GN=DSP PE=1 SV=3	DESP_HUMAN	DSP	332 kDa	Homo sapiens	0	3	0	0	0	0	0	0	0	0	0	0	0	0	4	0
409	Platelet glycoprotein V OS=Homo sapiens OX=9606 GN=GP5 PE=1 SV=1	GPV_HUMAN	GP5	61 kDa	Homo sapiens	0	0	0	0	0	12	0	4	0	0	0	0	0	0	0	0
410	Complement factor H-related protein 4 OS=Homo sapiens OX=9606 GN=CFHR4 PE=1 SV=3	FHR4_HUMAN	CFHR4	65 kDa	Homo sapiens	0	0	0	0	0	1	0	0	1	1	3	0	0	0	0	0
411	Uncharacterized protein KIAA1211-like OS=Homo sapiens OX=9606 GN=KIAA1211L PE=1 SV=3	K121L_HUMAN	KIAA1211L	102 kDa	Homo sapiens	0	0	0	0	0	0	1	0	0	0	0	0	0	0	0	0
412	Phosphoglycerate kinase 1 OS=Homo sapiens OX=9606 GN=PGK1 PE=1 SV=3	PGK1_HUMAN	PGK1	45 kDa	Homo sapiens	1	0	0	0	0	0	0	0	0	0	0	1	1	0	0	0
413	CASP8-associated protein 2 OS=Homo sapiens OX=9606 GN=CASP8AP2 PE=1 SV=1	C8AP2_HUMAN	CASP8AP2	223 kDa	Homo sapiens	0	0	0	0	0	0	0	1	0	0	0	0	0	0	0	0
414	Transitional endoplasmic reticulum ATPase OS=Homo sapiens OX=9606 GN=VCP PE=1 SV=4	TERA_HUMAN	VCP	89 kDa	Homo sapiens	2	0	0	0	2	0	0	0	0	0	0	1	2	1	0	0
415	CCR4-NOT transcription complex subunit 1 OS=Homo sapiens OX=9606 GN=CNOT1 PE=1 SV=2	CNOT1_HUMAN	CNOT1	267 kDa	Homo sapiens	0	0	3	2	0	0	0	0	0	0	0	0	0	0	0	0
416	Fatty-acid amide hydrolase 2 OS=Homo sapiens OX=9606 GN=FAAH2 PE=2 SV=1	FAAH2_HUMAN	FAAH2	58 kDa	Homo sapiens	0	0	0	0	0	0	0	0	0	0	0	0	0	0	1	0
417	Periostin OS=Homo sapiens OX=9606 GN=POSTN PE=1 SV=2	POSTN_HUMAN	POSTN	93 kDa	Homo sapiens	0	0	0	0	0	0	0	0	0	0	0	0	0	1	3	9
418	Propionyl-CoA carboxylase beta chain, mitochondrial OS=Homo sapiens OX=9606 GN=PCCB PE=1 SV=3	PCCB_HUMAN	PCCB	58 kDa	Homo sapiens	0	0	0	0	0	0	0	0	0	0	0	1	0	0	0	0
419	Serine/threonine-protein kinase SMG1 OS=Homo sapiens OX=9606 GN=SMG1 PE=1 SV=3	SMG1_HUMAN	SMG1	410 kDa	Homo sapiens	0	0	1	0	0	0	0	0	0	0	0	0	1	0	1	0
420	Protein HID1 OS=Homo sapiens OX=9606 GN=HID1 PE=1 SV=1	HID1_HUMAN	HID1	89 kDa	Homo sapiens	1	0	0	0	0	0	0	0	0	0	0	0	0	0	0	0
421	Myomesin-1 OS=Homo sapiens OX=9606 GN=MYOM1 PE=1 SV=2	MYOM1_HUMAN	MYOM1	188 kDa	Homo sapiens	0	0	0	0	0	2	1	1	0	0	0	0	0	0	0	0
422	Immunoglobulin heavy variable 1-69-2 OS=Homo sapiens OX=9606 GN=IGHV1-69-2 PE=3 SV=2	HV692_HUMAN	IGHV1-69-2	13 kDa	Homo sapiens	0	0	0	0	0	0	1	0	0	0	5	0	0	0	0	0
423	Ubiquitin-protein ligase E3B OS=Homo sapiens OX=9606 GN=UBE3B PE=1 SV=3	UBE3B_HUMAN	UBE3B	123 kDa	Homo sapiens	0	0	0	0	0	0	0	0	0	0	0	0	0	0	0	1
424	A disintegrin and metalloproteinase with thrombospondin motifs 13 OS=Homo sapiens OX=9606 GN=ADAMTS13 PE=1 SV=1	ATS13_HUMAN	ADAMTS13	154 kDa	Homo sapiens	0	0	0	2	0	0	0	0	0	0	1	3	0	0	0	0
425	Msx2-interacting protein OS=Homo sapiens OX=9606 GN=SPEN PE=1 SV=1	MINT_HUMAN	SPEN	402 kDa	Homo sapiens	0	0	0	0	0	0	0	0	1	0	0	0	0	0	0	0
426	Proline-rich protein 20G OS=Homo sapiens OX=9606 GN=PRR20G PE=3 SV=1	PR20G_HUMAN	PRR20G	22 kDa	Homo sapiens	0	0	0	0	0	0	0	0	0	0	0	0	0	1	0	0
427	Death-inducer obliterator 1 OS=Homo sapiens OX=9606 GN=DIDO1 PE=1 SV=5	DIDO1_HUMAN	DIDO1	244 kDa	Homo sapiens	0	0	0	0	0	0	0	0	0	1	0	0	0	0	0	0
428	Vasorin OS=Homo sapiens OX=9606 GN=VASN PE=1 SV=1	VASN_HUMAN	VASN	72 kDa	Homo sapiens	0	0	0	0	0	0	0	0	0	0	1	0	1	1	0	2
429	Platelet glycoprotein Ib alpha chain OS=Homo sapiens OX=9606 GN=GP1BA PE=1 SV=2	GP1BA_HUMAN	GP1BA	72 kDa	Homo sapiens	0	0	0	1	0	0	0	0	0	0	0	0	3	1	0	0
430	Trinucleotide repeat-containing gene 18 protein OS=Homo sapiens OX=9606 GN=TNRC18 PE=1 SV=3	TNC18_HUMAN	TNRC18	315 kDa	Homo sapiens	0	0	0	0	0	0	0	1	0	0	0	0	0	0	0	0
431	Kinesin-like protein KIF26B OS=Homo sapiens OX=9606 GN=KIF26B PE=1 SV=1	KI26B_HUMAN	KIF26B	224 kDa	Homo sapiens	0	0	0	0	0	0	0	0	0	0	0	0	0	0	0	1
432	Protein prune homolog 2 OS=Homo sapiens OX=9606 GN=PRUNE2 PE=1 SV=3	PRUN2_HUMAN	PRUNE2	341 kDa	Homo sapiens	0	0	0	0	0	0	0	0	0	0	0	0	2	0	0	0
433	Proprotein convertase subtilisin/kexin type 9 OS=Homo sapiens OX=9606 GN=PCSK9 PE=1 SV=3	PCSK9_HUMAN	PCSK9	74 kDa	Homo sapiens	0	0	5	0	0	0	0	0	0	0	0	0	0	0	0	0
434	PDZ domain-containing protein 2 OS=Homo sapiens OX=9606 GN=PDZD2 PE=1 SV=4	PDZD2_HUMAN	PDZD2	302 kDa	Homo sapiens	0	0	0	0	0	0	0	0	1	0	0	0	0	0	0	0
435	Immunoglobulin heavy variable 1-45 OS=Homo sapiens OX=9606 GN=IGHV1-45 PE=3 SV=1	HV145_HUMAN	IGHV1-45	14 kDa	Homo sapiens	0	1	0	0	0	0	0	0	0	0	0	0	0	0	0	0
436	Indian hedgehog protein OS=Homo sapiens OX=9606 GN=IHH PE=1 SV=4	IHH_HUMAN	IHH	45 kDa	Homo sapiens	0	0	0	0	0	1	0	0	0	1	0	0	0	0	0	0
437	Protein disulfide-isomerase A3 OS=Homo sapiens OX=9606 GN=PDIA3 PE=1 SV=4	PDIA3_HUMAN	PDIA3	57 kDa	Homo sapiens	0	0	0	1	0	0	0	0	0	0	0	0	0	0	0	0
438	Membrane-associated guanylate kinase, WW and PDZ domain-containing protein 2 OS=Homo sapiens OX=9606 GN=MAGI2 PE=1 SV=3	MAGI2_HUMAN	MAGI2	159 kDa	Homo sapiens	0	0	0	0	0	0	0	0	0	0	0	0	0	1	0	0
439	Paxillin OS=Homo sapiens OX=9606 GN=PXN PE=1 SV=3	PAXI_HUMAN	PXN	65 kDa	Homo sapiens	0	0	0	0	0	1	0	0	1	0	0	0	0	0	0	0
440	Caspase-10 OS=Homo sapiens OX=9606 GN=CASP10 PE=1 SV=3	CASPA_HUMAN	CASP10	59 kDa	Homo sapiens	1	0	0	0	0	0	0	0	0	0	0	0	0	0	0	0
441	Microfibril-associated glycoprotein 4 OS=Homo sapiens OX=9606 GN=MFAP4 PE=1 SV=2	MFAP4_HUMAN	MFAP4	29 kDa	Homo sapiens	0	1	0	0	0	0	0	0	0	0	0	0	0	4	0	1
442	Lysine-specific demethylase 5B OS=Homo sapiens OX=9606 GN=KDM5B PE=1 SV=3	KDM5B_HUMAN	KDM5B	176 kDa	Homo sapiens	0	0	0	0	0	0	1	0	0	0	0	0	0	0	0	0
443	Laminin subunit alpha-5 OS=Homo sapiens OX=9606 GN=LAMA5 PE=1 SV=8	LAMA5_HUMAN	LAMA5	400 kDa	Homo sapiens	1	0	0	0	0	0	0	0	0	0	0	0	0	0	0	0
444	Serine protease inhibitor Kazal-type 5 OS=Homo sapiens OX=9606 GN=SPINK5 PE=1 SV=2	ISK5_HUMAN	SPINK5	121 kDa	Homo sapiens	0	0	0	0	0	0	0	0	0	0	0	0	1	0	0	0
445	Collagen alpha-2(IV) chain OS=Homo sapiens OX=9606 GN=COL4A2 PE=1 SV=4	CO4A2_HUMAN	COL4A2	168 kDa	Homo sapiens	0	0	0	0	0	0	0	0	0	0	0	1	0	0	0	0
446	Xaa-Pro dipeptidase OS=Homo sapiens OX=9606 GN=PEPD PE=1 SV=3	PEPD_HUMAN	PEPD	55 kDa	Homo sapiens	0	0	0	0	0	0	0	0	0	0	0	2	0	0	0	0
447	72 kDa type IV collagenase OS=Homo sapiens OX=9606 GN=MMP2 PE=1 SV=2	MMP2_HUMAN	MMP2	74 kDa	Homo sapiens	0	1	0	0	0	2	0	0	0	0	3	0	0	0	0	0
448	Neutrophil gelatinase-associated lipocalin OS=Homo sapiens OX=9606 GN=LCN2 PE=1 SV=2	NGAL_HUMAN	LCN2	23 kDa	Homo sapiens	0	0	0	0	0	0	0	0	0	3	0	0	0	5	0	0
449	Fructose-bisphosphate aldolase A OS=Homo sapiens OX=9606 GN=ALDOA PE=1 SV=2	ALDOA_HUMAN	ALDOA	39 kDa	Homo sapiens	0	1	0	0	0	0	0	0	0	0	0	0	0	0	0	0
450	Myeloperoxidase OS=Homo sapiens OX=9606 GN=MPO PE=1 SV=1	PERM_HUMAN	MPO	84 kDa	Homo sapiens	0	0	0	0	0	0	0	0	0	0	0	0	0	1	0	0
451	Ankyrin repeat domain-containing protein 11 OS=Homo sapiens OX=9606 GN=ANKRD11 PE=1 SV=3	ANR11_HUMAN	ANKRD11	298 kDa	Homo sapiens	0	0	0	0	0	0	0	0	0	1	0	0	0	0	0	0
452	Ferritin light chain OS=Homo sapiens OX=9606 GN=FTL PE=1 SV=2	FRIL_HUMAN	FTL	20 kDa	Homo sapiens	0	0	0	0	0	0	0	0	0	0	0	0	0	6	0	1
453	Immunoglobulin heavy variable 1-58 OS=Homo sapiens OX=9606 GN=IGHV1-58 PE=3 SV=1	HV158_HUMAN	IGHV1-58	13 kDa	Homo sapiens	0	0	0	0	0	0	0	0	0	0	6	0	0	0	0	0
454	Microtubule-associated protein 1S OS=Homo sapiens OX=9606 GN=MAP1S PE=1 SV=2	MAP1S_HUMAN	MAP1S	112 kDa	Homo sapiens	0	0	0	0	0	0	0	0	0	1	0	0	0	0	0	0
455	Myosin-15 OS=Homo sapiens OX=9606 GN=MYH15 PE=1 SV=5	MYH15_HUMAN	MYH15	225 kDa	Homo sapiens	0	0	0	0	0	0	0	1	0	0	0	0	0	0	0	0
456	Cartilage acidic protein 1 OS=Homo sapiens OX=9606 GN=CRTAC1 PE=1 SV=2	CRAC1_HUMAN	CRTAC1	71 kDa	Homo sapiens	0	2	0	2	0	0	0	0	0	0	0	0	0	0	0	0
457	HLA class I histocompatibility antigen, A-24 alpha chain OS=Homo sapiens OX=9606 GN=HLA-A PE=1 SV=2	1A24_HUMAN	HLA-A	41 kDa	Homo sapiens	0	0	0	0	0	0	0	0	0	0	0	0	0	0	2	4
458	Immunoglobulin kappa variable 1D-17 OS=Homo sapiens OX=9606 GN=IGKV1D-17 PE=3 SV=1	KVD17_HUMAN	IGKV1D-17	13 kDa	Homo sapiens	0	0	0	0	0	0	0	0	0	0	2	0	0	0	0	0
459	Filaggrin OS=Homo sapiens OX=9606 GN=FLG PE=1 SV=3	FILA_HUMAN	FLG	435 kDa	Homo sapiens	0	0	0	0	0	0	0	0	0	0	0	0	0	0	4	0
460	Collagen alpha-1(III) chain OS=Homo sapiens OX=9606 GN=COL3A1 PE=1 SV=4	CO3A1_HUMAN	COL3A1	139 kDa	Homo sapiens	0	0	0	0	0	1	0	0	0	0	0	0	0	0	0	0
461	Leucine zipper putative tumor suppressor 2 OS=Homo sapiens OX=9606 GN=LZTS2 PE=1 SV=2	LZTS2_HUMAN	LZTS2	73 kDa	Homo sapiens	0	0	0	0	0	0	0	0	0	0	0	2	0	0	0	0
462	L-lactate dehydrogenase A chain OS=Homo sapiens OX=9606 GN=LDHA PE=1 SV=2	LDHA_HUMAN	LDHA	37 kDa	Homo sapiens	0	0	0	0	0	0	0	0	0	0	0	0	0	4	2	0
463	Cysteine and glycine-rich protein 1 OS=Homo sapiens OX=9606 GN=CSRP1 PE=1 SV=3	CSRP1_HUMAN	CSRP1	21 kDa	Homo sapiens	0	0	0	0	0	0	0	0	0	0	0	0	2	0	0	0
464	Platelet glycoprotein Ib beta chain OS=Homo sapiens OX=9606 GN=GP1BB PE=1 SV=1	GP1BB_HUMAN	GP1BB	22 kDa	Homo sapiens	0	0	0	0	0	0	0	0	0	0	0	0	1	0	0	0
465	Leucine-rich repeat and IQ domain-containing protein 1 OS=Homo sapiens OX=9606 GN=LRRIQ1 PE=2 SV=3	LRIQ1_HUMAN	LRRIQ1	199 kDa	Homo sapiens	0	0	0	1	0	0	0	0	0	0	0	0	0	0	0	0
466	Receptor-type tyrosine-protein phosphatase kappa OS=Homo sapiens OX=9606 GN=PTPRK PE=1 SV=2	PTPRK_HUMAN	PTPRK	162 kDa	Homo sapiens	0	0	0	0	0	0	0	0	0	0	0	0	0	0	1	0
467	Keratinocyte proline-rich protein OS=Homo sapiens OX=9606 GN=KPRP PE=1 SV=1	KPRP_HUMAN	KPRP	64 kDa	Homo sapiens	0	3	0	0	0	0	0	0	0	0	0	0	0	0	0	0
468	Immunoglobulin heavy variable 7-4-1 OS=Homo sapiens OX=9606 GN=IGHV7-4-1 PE=3 SV=1	HV741_HUMAN	IGHV7-4-1	13 kDa	Homo sapiens	0	0	0	0	0	0	0	0	0	0	11	0	0	0	0	0
469	1-phosphatidylinositol 4,5-bisphosphate phosphodiesterase beta-2 OS=Homo sapiens OX=9606 GN=PLCB2 PE=1 SV=2	PLCB2_HUMAN	PLCB2	134 kDa	Homo sapiens	0	0	0	0	0	0	0	0	0	0	0	0	0	1	0	0
470	Ezrin OS=Homo sapiens OX=9606 GN=EZR PE=1 SV=4	EZRI_HUMAN	EZR	69 kDa	Homo sapiens	0	0	0	0	0	0	0	0	0	0	0	0	0	1	0	0
471	Transcription factor SOX-30 OS=Homo sapiens OX=9606 GN=SOX30 PE=1 SV=1	SOX30_HUMAN	SOX30	82 kDa	Homo sapiens	1	0	0	0	0	0	0	0	0	0	0	0	0	0	0	0
472	ADAMTS-like protein 4 OS=Homo sapiens OX=9606 GN=ADAMTSL4 PE=1 SV=2	ATL4_HUMAN	ADAMTSL4	117 kDa	Homo sapiens	0	0	0	0	0	0	0	0	0	0	0	0	0	1	0	0
473	Dynein heavy chain 8, axonemal OS=Homo sapiens OX=9606 GN=DNAH8 PE=1 SV=2	DYH8_HUMAN	DNAH8	515 kDa	Homo sapiens	0	0	0	0	0	0	0	0	0	0	0	0	0	0	0	1
474	Alcohol dehydrogenase 1B OS=Homo sapiens OX=9606 GN=ADH1B PE=1 SV=2	ADH1B_HUMAN	ADH1B	40 kDa	Homo sapiens	0	0	0	0	0	0	0	0	0	0	0	0	0	0	1	0
475	Prolow-density lipoprotein receptor-related protein 1 OS=Homo sapiens OX=9606 GN=LRP1 PE=1 SV=2	LRP1_HUMAN	LRP1	505 kDa	Homo sapiens	0	0	1	0	0	0	0	0	0	0	0	0	0	0	0	0
476	Ras and Rab interactor 3 OS=Homo sapiens OX=9606 GN=RIN3 PE=1 SV=4	RIN3_HUMAN	RIN3	108 kDa	Homo sapiens	0	0	0	0	0	0	0	0	0	0	2	0	0	0	0	0
477	Collagen alpha-1(I) chain OS=Homo sapiens OX=9606 GN=COL1A1 PE=1 SV=5	CO1A1_HUMAN	COL1A1	139 kDa	Homo sapiens	0	0	0	0	1	0	0	0	0	0	0	0	0	0	0	0
478	Probable E3 ubiquitin-protein ligase HECTD4 OS=Homo sapiens OX=9606 GN=HECTD4 PE=1 SV=5	HECD4_HUMAN	HECTD4	439 kDa	Homo sapiens	0	0	0	0	0	0	0	0	0	0	0	0	0	1	0	0
479	Platelet-activating factor acetylhydrolase OS=Homo sapiens OX=9606 GN=PLA2G7 PE=1 SV=1	PAFA_HUMAN	PLA2G7	50 kDa	Homo sapiens	0	0	0	2	0	0	0	0	0	0	0	0	2	0	0	0
480	CD109 antigen OS=Homo sapiens OX=9606 GN=CD109 PE=1 SV=2	CD109_HUMAN	CD109	162 kDa	Homo sapiens	0	0	0	0	0	0	0	0	0	0	0	0	0	1	0	0
481	Neural cell adhesion molecule L1-like protein OS=Homo sapiens OX=9606 GN=CHL1 PE=1 SV=4	NCHL1_HUMAN	CHL1	135 kDa	Homo sapiens	0	0	0	0	0	0	0	1	0	0	0	0	0	0	0	0
482	Matrix metalloproteinase-16 OS=Homo sapiens OX=9606 GN=MMP16 PE=1 SV=2	MMP16_HUMAN	MMP16	70 kDa	Homo sapiens	0	0	0	0	0	0	0	0	0	0	1	0	0	0	0	0
483	SPARC-like protein 1 OS=Homo sapiens OX=9606 GN=SPARCL1 PE=1 SV=2	SPRL1_HUMAN	SPARCL1	75 kDa	Homo sapiens	0	0	1	0	0	0	0	0	0	0	0	0	0	1	0	0
484	Nuclear pore complex protein Nup155 OS=Homo sapiens OX=9606 GN=NUP155 PE=1 SV=1	NU155_HUMAN	NUP155	155 kDa	Homo sapiens	0	0	0	0	0	1	0	0	0	0	0	1	0	0	0	0
485	Secreted phosphoprotein 24 OS=Homo sapiens OX=9606 GN=SPP2 PE=1 SV=1	SPP24_HUMAN	SPP2	24 kDa	Homo sapiens	0	2	0	0	0	0	0	0	0	0	0	0	0	0	0	1
486	Coiled-coil domain-containing protein 77 OS=Homo sapiens OX=9606 GN=CCDC77 PE=1 SV=1	CCD77_HUMAN	CCDC77	57 kDa	Homo sapiens	0	0	0	0	0	0	0	0	1	0	0	0	0	0	0	0
487	Cadherin-5 OS=Homo sapiens OX=9606 GN=CDH5 PE=1 SV=5	CADH5_HUMAN	CDH5	88 kDa	Homo sapiens	0	0	0	0	0	0	0	0	0	0	0	0	0	0	0	1
488	Solute carrier family 12 member 5 OS=Homo sapiens OX=9606 GN=SLC12A5 PE=1 SV=3	S12A5_HUMAN	SLC12A5	126 kDa	Homo sapiens	0	0	0	0	1	0	0	0	0	0	0	0	0	0	0	0
489	Keratin, type II cuticular Hb5 OS=Homo sapiens OX=9606 GN=KRT85 PE=1 SV=1	KRT85_HUMAN	KRT85	56 kDa	Homo sapiens	0	0	0	0	0	0	0	0	0	0	0	0	0	0	0	16
490	Alpha-enolase OS=Homo sapiens OX=9606 GN=ENO1 PE=1 SV=2	ENOA_HUMAN	ENO1	47 kDa	Homo sapiens	0	0	0	0	0	0	0	0	0	0	0	1	0	3	0	0
491	Smoothelin-like protein 1 OS=Homo sapiens OX=9606 GN=SMTNL1 PE=1 SV=2	SMTL1_HUMAN	SMTNL1	53 kDa	Homo sapiens	0	0	0	0	1	0	0	0	0	0	0	0	0	0	0	0
492	Zinc finger protein 638 OS=Homo sapiens OX=9606 GN=ZNF638 PE=1 SV=2	ZN638_HUMAN	ZNF638	221 kDa	Homo sapiens	0	0	0	1	0	0	0	0	0	0	0	0	0	0	0	0
493	Ectonucleotide pyrophosphatase/phosphodiesterase family member 2 OS=Homo sapiens OX=9606 GN=ENPP2 PE=1 SV=3	ENPP2_HUMAN	ENPP2	99 kDa	Homo sapiens	0	0	2	0	0	0	0	0	0	0	0	0	0	0	0	0
494	Immunoglobulin lambda variable 7-46 OS=Homo sapiens OX=9606 GN=IGLV7-46 PE=3 SV=4	LV746_HUMAN	IGLV7-46	12 kDa	Homo sapiens	0	0	0	0	0	0	0	0	0	0	3	0	0	0	0	0
495	RNA-binding motif protein, X chromosome OS=Homo sapiens OX=9606 GN=RBMX PE=1 SV=3	RBMX_HUMAN	RBMX	42 kDa	Homo sapiens	0	0	0	0	0	0	0	0	1	0	0	0	0	0	0	0
496	Rho GTPase-activating protein 44 OS=Homo sapiens OX=9606 GN=ARHGAP44 PE=1 SV=1	RHG44_HUMAN	ARHGAP44	89 kDa	Homo sapiens	0	0	0	0	2	0	0	0	0	0	0	0	0	0	0	0
497	Gamma-glutamyl hydrolase OS=Homo sapiens OX=9606 GN=GGH PE=1 SV=2	GGH_HUMAN	GGH	36 kDa	Homo sapiens	0	0	0	0	0	1	0	1	0	0	0	0	0	0	0	0
498	Immunoglobulin heavy variable 2-70 OS=Homo sapiens OX=9606 GN=IGHV2-70 PE=1 SV=2	HV270_HUMAN	IGHV2-70	13 kDa	Homo sapiens	3	0	0	0	0	0	0	0	0	0	0	0	0	0	0	0
499	Meiosis-specific nuclear structural protein 1 OS=Homo sapiens OX=9606 GN=MNS1 PE=2 SV=2	MNS1_HUMAN	MNS1	61 kDa	Homo sapiens	0	0	0	0	0	0	0	0	0	0	0	0	0	0	0	1
500	Protein ENL OS=Homo sapiens OX=9606 GN=MLLT1 PE=1 SV=2	ENL_HUMAN	MLLT1	62 kDa	Homo sapiens	0	0	0	1	0	0	0	0	0	0	0	0	0	0	0	0
501	Protein CLEC16A OS=Homo sapiens OX=9606 GN=CLEC16A PE=1 SV=2	CL16A_HUMAN	CLEC16A	118 kDa	Homo sapiens	0	0	0	0	0	0	1	0	0	0	0	0	0	0	0	0
502	Potassium/sodium hyperpolarization-activated cyclic nucleotide-gated channel 4 OS=Homo sapiens OX=9606 GN=HCN4 PE=1 SV=1	HCN4_HUMAN	HCN4	129 kDa	Homo sapiens	0	0	0	0	0	0	0	0	0	0	0	1	0	0	0	0
503	Neuron navigator 2 OS=Homo sapiens OX=9606 GN=NAV2 PE=1 SV=3	NAV2_HUMAN	NAV2	268 kDa	Homo sapiens	0	0	0	0	0	1	0	0	0	0	0	0	0	0	0	0
504	DNA (cytosine-5)-methyltransferase 1 OS=Homo sapiens OX=9606 GN=DNMT1 PE=1 SV=2	DNMT1_HUMAN	DNMT1	183 kDa	Homo sapiens	0	0	0	0	0	0	0	0	1	0	0	0	0	0	0	0
505	Protein strawberry notch homolog 2 OS=Homo sapiens OX=9606 GN=SBNO2 PE=2 SV=3	SBNO2_HUMAN	SBNO2	150 kDa	Homo sapiens	0	0	0	0	0	0	0	0	0	0	0	1	0	0	0	0
506	Arginine-glutamic acid dipeptide repeats protein OS=Homo sapiens OX=9606 GN=RERE PE=1 SV=2	RERE_HUMAN	RERE	172 kDa	Homo sapiens	0	0	0	0	0	0	0	0	1	0	0	0	0	0	0	0
507	Fibrillin-1 OS=Homo sapiens OX=9606 GN=FBN1 PE=1 SV=4	FBN1_HUMAN	FBN1	312 kDa	Homo sapiens	0	0	0	0	0	0	0	0	0	0	0	0	0	2	0	0
508	Eukaryotic peptide chain release factor GTP-binding subunit ERF3B OS=Homo sapiens OX=9606 GN=GSPT2 PE=1 SV=2	ERF3B_HUMAN	GSPT2	69 kDa	Homo sapiens	0	0	0	0	0	0	0	0	0	2	0	0	0	0	0	0
509	Rho guanine nucleotide exchange factor 2 OS=Homo sapiens OX=9606 GN=ARHGEF2 PE=1 SV=4	ARHG2_HUMAN	ARHGEF2	112 kDa	Homo sapiens	0	0	0	1	0	0	0	0	0	0	0	0	0	0	0	0
510	ALK tyrosine kinase receptor OS=Homo sapiens OX=9606 GN=ALK PE=1 SV=3	ALK_HUMAN	ALK	176 kDa	Homo sapiens	0	0	0	0	0	1	0	0	0	0	0	0	0	0	0	0
511	G protein-regulated inducer of neurite outgrowth 1 OS=Homo sapiens OX=9606 GN=GPRIN1 PE=1 SV=2	GRIN1_HUMAN	GPRIN1	102 kDa	Homo sapiens	0	0	0	0	0	0	0	0	0	0	0	2	0	0	0	0
512	Lipopolysaccharide-responsive and beige-like anchor protein OS=Homo sapiens OX=9606 GN=LRBA PE=1 SV=4	LRBA_HUMAN	LRBA	319 kDa	Homo sapiens	0	0	0	0	0	0	0	0	0	0	0	0	2	0	0	0
513	Heat shock cognate 71 kDa protein OS=Homo sapiens OX=9606 GN=HSPA8 PE=1 SV=1	HSP7C_HUMAN	HSPA8	71 kDa	Homo sapiens	2	0	0	0	0	0	0	0	0	0	0	0	0	0	0	0
514	Serine/arginine repetitive matrix protein 4 OS=Homo sapiens OX=9606 GN=SRRM4 PE=1 SV=2	SRRM4_HUMAN	SRRM4	69 kDa	Homo sapiens	0	0	0	0	0	0	1	0	0	0	0	0	0	0	0	0
515	V-set and immunoglobulin domain-containing protein 4 OS=Homo sapiens OX=9606 GN=VSIG4 PE=1 SV=1	VSIG4_HUMAN	VSIG4	44 kDa	Homo sapiens	0	0	0	0	0	0	0	0	0	0	0	0	0	5	0	0
516	Amyloid-beta precursor protein OS=Homo sapiens OX=9606 GN=APP PE=1 SV=3	A4_HUMAN	APP	87 kDa	Homo sapiens	0	0	0	0	0	2	0	0	0	0	0	0	0	0	0	0
517	Spectrin beta chain, non-erythrocytic 1 OS=Homo sapiens OX=9606 GN=SPTBN1 PE=1 SV=2	SPTB2_HUMAN	SPTBN1	275 kDa	Homo sapiens	0	0	0	0	0	0	0	0	1	0	0	0	0	0	0	0
518	HLA class I histocompatibility antigen, B-52 alpha chain OS=Homo sapiens OX=9606 GN=HLA-B PE=1 SV=1	1B52_HUMAN	HLA-B	41 kDa	Homo sapiens	0	0	0	0	0	0	0	0	0	0	0	0	1	0	0	0
519	Spectrin beta chain, erythrocytic OS=Homo sapiens OX=9606 GN=SPTB PE=1 SV=5	SPTB1_HUMAN	SPTB	246 kDa	Homo sapiens	0	0	0	0	0	0	0	0	0	0	0	0	0	2	0	0
520	Solute carrier family 2, facilitated glucose transporter member 1 OS=Homo sapiens OX=9606 GN=SLC2A1 PE=1 SV=2	GTR1_HUMAN	SLC2A1	54 kDa	Homo sapiens	0	0	0	0	0	0	0	0	0	0	0	0	0	4	0	0
521	Biorientation of chromosomes in cell division protein 1-like 1 OS=Homo sapiens OX=9606 GN=BOD1L1 PE=1 SV=2	BD1L1_HUMAN	BOD1L1	330 kDa	Homo sapiens	0	0	0	0	1	0	0	0	0	0	0	0	0	0	0	0
522	Villin-1 OS=Homo sapiens OX=9606 GN=VIL1 PE=1 SV=4	VILI_HUMAN	VIL1	93 kDa	Homo sapiens	0	0	0	0	0	0	1	0	0	0	0	0	0	0	0	0
523	Extracellular superoxide dismutase [Cu-Zn] OS=Homo sapiens OX=9606 GN=SOD3 PE=1 SV=2	SODE_HUMAN	SOD3	26 kDa	Homo sapiens	0	0	0	0	0	0	0	0	0	0	0	3	0	0	0	0
524	Kelch-like protein 11 OS=Homo sapiens OX=9606 GN=KLHL11 PE=1 SV=1	KLH11_HUMAN	KLHL11	80 kDa	Homo sapiens	0	0	0	0	0	1	0	0	0	0	0	0	0	0	0	0
525	Pantetheinase OS=Homo sapiens OX=9606 GN=VNN1 PE=1 SV=2	VNN1_HUMAN	VNN1	57 kDa	Homo sapiens	0	0	0	0	0	0	0	0	0	0	0	0	0	0	0	2
526	Keratin, type I cytoskeletal 17 OS=Homo sapiens OX=9606 GN=KRT17 PE=1 SV=2	K1C17_HUMAN	KRT17	48 kDa	Homo sapiens	0	0	0	0	2	0	0	0	0	0	0	0	0	0	0	0
527	Cathepsin D OS=Homo sapiens OX=9606 GN=CTSD PE=1 SV=1	CATD_HUMAN	CTSD	45 kDa	Homo sapiens	0	0	0	0	0	0	0	0	0	0	0	0	3	0	0	0
528	Myosin-binding protein C, cardiac-type OS=Homo sapiens OX=9606 GN=MYBPC3 PE=1 SV=4	MYPC3_HUMAN	MYBPC3	141 kDa	Homo sapiens	0	0	0	0	0	1	0	0	0	0	0	0	0	0	0	0
529	ATPase family AAA domain-containing protein 5 OS=Homo sapiens OX=9606 GN=ATAD5 PE=1 SV=4	ATAD5_HUMAN	ATAD5	208 kDa	Homo sapiens	0	0	0	0	0	0	0	0	0	0	0	0	0	0	1	0
530	Serine/threonine-protein kinase mTOR OS=Homo sapiens OX=9606 GN=MTOR PE=1 SV=1	MTOR_HUMAN	MTOR	289 kDa	Homo sapiens	0	0	0	0	0	0	1	0	0	0	0	0	0	0	0	0
531	Integrin alpha-1 OS=Homo sapiens OX=9606 GN=ITGA1 PE=1 SV=2	ITA1_HUMAN	ITGA1	131 kDa	Homo sapiens	0	0	0	0	0	0	0	0	0	0	0	0	0	0	1	0
532	Rho guanine nucleotide exchange factor 10 OS=Homo sapiens OX=9606 GN=ARHGEF10 PE=1 SV=4	ARHGA_HUMAN	ARHGEF10	152 kDa	Homo sapiens	0	0	0	0	0	0	0	0	0	0	0	1	0	0	0	0
533	Fibulin-5 OS=Homo sapiens OX=9606 GN=FBLN5 PE=1 SV=1	FBLN5_HUMAN	FBLN5	50 kDa	Homo sapiens	0	0	0	0	0	0	0	0	2	0	0	0	0	0	0	0
534	Coiled-coil domain-containing protein 71 OS=Homo sapiens OX=9606 GN=CCDC71 PE=1 SV=3	CCD71_HUMAN	CCDC71	50 kDa	Homo sapiens	0	0	0	0	0	1	0	0	0	0	0	0	0	0	0	0
535	Keratin-associated protein 2-1 OS=Homo sapiens OX=9606 GN=KRTAP2-1 PE=2 SV=2	KRA21_HUMAN (+1)	KRTAP2-1	14 kDa	Homo sapiens	0	0	0	0	0	0	0	0	0	0	0	0	0	0	0	1
536	RNA binding protein fox-1 homolog 1 OS=Homo sapiens OX=9606 GN=RBFOX1 PE=1 SV=2	RFOX1_HUMAN	RBFOX1	43 kDa	Homo sapiens	0	0	0	0	0	0	0	0	0	0	1	0	0	0	0	0
537	Dual specificity protein kinase TTK OS=Homo sapiens OX=9606 GN=TTK PE=1 SV=2	TTK_HUMAN	TTK	97 kDa	Homo sapiens	0	0	0	0	0	0	1	0	0	0	0	0	0	0	0	0
538	YY1-associated protein 1 OS=Homo sapiens OX=9606 GN=YY1AP1 PE=1 SV=2	YYAP1_HUMAN	YY1AP1	88 kDa	Homo sapiens	0	0	1	0	0	0	0	0	0	0	0	0	0	0	0	0
539	Syntaxin-10 OS=Homo sapiens OX=9606 GN=STX10 PE=1 SV=1	STX10_HUMAN	STX10	28 kDa	Homo sapiens	0	0	0	0	0	0	0	0	0	0	0	0	0	0	1	0
540	E3 SUMO-protein ligase PIAS3 OS=Homo sapiens OX=9606 GN=PIAS3 PE=1 SV=2	PIAS3_HUMAN	PIAS3	68 kDa	Homo sapiens	0	0	0	0	0	0	0	1	0	0	0	0	0	0	0	0
541	Mucin-like protein 3 OS=Homo sapiens OX=9606 GN=MUCL3 PE=1 SV=2	MUCL3_HUMAN	MUCL3	56 kDa	Homo sapiens	1	0	0	0	0	0	0	0	0	0	0	0	0	0	0	0
542	Profilin-1 OS=Homo sapiens OX=9606 GN=PFN1 PE=1 SV=2	PROF1_HUMAN	PFN1	15 kDa	Homo sapiens	0	0	0	0	0	0	0	0	0	0	0	0	2	0	0	0
543	Myomesin-3 OS=Homo sapiens OX=9606 GN=MYOM3 PE=1 SV=1	MYOM3_HUMAN	MYOM3	162 kDa	Homo sapiens	0	0	0	0	0	0	0	0	1	0	0	0	0	0	0	0
544	Tolloid-like protein 1 OS=Homo sapiens OX=9606 GN=TLL1 PE=1 SV=1	TLL1_HUMAN	TLL1	115 kDa	Homo sapiens	0	0	0	0	0	0	0	0	0	0	0	0	0	1	0	0
545	Laminin subunit beta-4 OS=Homo sapiens OX=9606 GN=LAMB4 PE=2 SV=1	LAMB4_HUMAN	LAMB4	194 kDa	Homo sapiens	0	0	0	0	0	0	0	0	1	0	0	0	0	0	0	0
546	RING finger protein 150 OS=Homo sapiens OX=9606 GN=RNF150 PE=2 SV=2	RN150_HUMAN	RNF150	48 kDa	Homo sapiens	0	0	0	0	0	0	0	0	1	0	0	0	0	0	0	0
547	Adhesion G protein-coupled receptor A2 OS=Homo sapiens OX=9606 GN=ADGRA2 PE=1 SV=2	AGRA2_HUMAN	ADGRA2	143 kDa	Homo sapiens	1	0	0	0	0	0	0	0	0	0	0	0	0	0	0	0
548	Alpha-mannosidase 2 OS=Homo sapiens OX=9606 GN=MAN2A1 PE=1 SV=2	MA2A1_HUMAN	MAN2A1	131 kDa	Homo sapiens	0	0	2	0	0	0	0	0	0	0	0	0	0	0	0	0
549	Epidermal growth factor-like protein 7 OS=Homo sapiens OX=9606 GN=EGFL7 PE=1 SV=3	EGFL7_HUMAN	EGFL7	30 kDa	Homo sapiens	0	0	0	0	0	0	0	0	0	0	0	0	1	0	0	0
550	Stromelysin-1 OS=Homo sapiens OX=9606 GN=MMP3 PE=1 SV=2	MMP3_HUMAN	MMP3	54 kDa	Homo sapiens	0	0	0	0	0	0	0	0	0	0	0	0	0	1	0	0
551	Cystatin-M OS=Homo sapiens OX=9606 GN=CST6 PE=1 SV=1	CYTM_HUMAN	CST6	17 kDa	Homo sapiens	0	0	0	0	0	0	0	0	0	0	0	0	0	3	0	0
552	Glutathione S-transferase omega-1 OS=Homo sapiens OX=9606 GN=GSTO1 PE=1 SV=2	GSTO1_HUMAN	GSTO1	28 kDa	Homo sapiens	1	0	0	0	0	0	0	0	0	0	0	0	0	0	0	0
553	Nitric oxide synthase, inducible OS=Homo sapiens OX=9606 GN=NOS2 PE=1 SV=2	NOS2_HUMAN	NOS2	131 kDa	Homo sapiens	0	0	0	0	0	0	1	0	0	0	0	0	0	0	0	0
554	Elongation factor-like GTPase 1 OS=Homo sapiens OX=9606 GN=EFL1 PE=1 SV=2	EFL1_HUMAN	EFL1	125 kDa	Homo sapiens	0	0	0	0	0	0	0	1	0	0	0	0	0	0	0	0
555	PML-RARA-regulated adapter molecule 1 OS=Homo sapiens OX=9606 GN=PRAM1 PE=1 SV=3	PRAM_HUMAN	PRAM1	74 kDa	Homo sapiens	0	0	1	0	0	0	0	0	0	0	0	0	0	0	0	0
556	Caveolae-associated protein 2 OS=Homo sapiens OX=9606 GN=CAVIN2 PE=1 SV=3	CAVN2_HUMAN	CAVIN2	47 kDa	Homo sapiens	0	0	0	0	0	0	0	0	0	0	0	2	0	0	0	0
557	Bone marrow proteoglycan OS=Homo sapiens OX=9606 GN=PRG2 PE=1 SV=2	PRG2_HUMAN	PRG2	25 kDa	Homo sapiens	0	0	0	1	0	0	0	0	0	0	0	0	0	0	0	0
558	Insulin-like growth factor-binding protein 6 OS=Homo sapiens OX=9606 GN=IGFBP6 PE=1 SV=1	IBP6_HUMAN	IGFBP6	25 kDa	Homo sapiens	0	0	0	0	0	0	0	0	0	0	0	0	0	1	0	0
559	Protein transport protein Sec31B OS=Homo sapiens OX=9606 GN=SEC31B PE=1 SV=1	SC31B_HUMAN	SEC31B	129 kDa	Homo sapiens	0	1	0	0	0	0	0	0	0	0	0	0	0	0	0	0
560	Ankyrin repeat and LEM domain-containing protein 2 OS=Homo sapiens OX=9606 GN=ANKLE2 PE=1 SV=4	ANKL2_HUMAN	ANKLE2	104 kDa	Homo sapiens	0	0	0	0	1	0	0	0	0	0	0	0	0	0	0	0
561	Oligodendrocyte transcription factor 2 OS=Homo sapiens OX=9606 GN=OLIG2 PE=2 SV=2	OLIG2_HUMAN	OLIG2	32 kDa	Homo sapiens	0	0	0	0	0	0	0	0	0	0	0	1	0	0	0	0
562	Protein FAM189B OS=Homo sapiens OX=9606 GN=FAM189B PE=1 SV=2	F189B_HUMAN	FAM189B	71 kDa	Homo sapiens	0	0	0	0	0	0	0	0	0	0	0	0	1	0	0	0
563	Mitogen-activated protein kinase kinase kinase 6 OS=Homo sapiens OX=9606 GN=MAP3K6 PE=1 SV=3	M3K6_HUMAN	MAP3K6	143 kDa	Homo sapiens	0	0	0	0	0	0	0	0	0	0	0	0	0	0	0	1
END OF FILE

## Sheet: Sheet1
	GBM L14-7	GBM L14-6	GBM L14-5	GBM L14-2	M-29 HC	HC-039	HC-036	HC-035	MMA L8-4	MMA L7-7	MMA L7-1	MMA L10-1	Met K18-5	Met K18-3	Met K15-6	Met K20-9
Alternate ID	GBM	GBM	GBM	GBM	HC	HC	HC	HC	MMA	MMA	MMA	MMA	Met	Met	Met	Met
ALB	6726	6546	7496	7532	7339	8483	6864	7535	5866	6592	6439	6703	7055	6259	6347	7337
C3	2915	2131	2756	2862	2119	2215	2282	2436	2565	2335	3180	2651	3331	2205	2700	3040
A2M	2172	4134	2443	2486	2208	1696	2023	2203	2068	2395	1867	1598	1985	1903	2251	1826
APOB	2027	2090	2494	2793	2153	1794	1465	1843	2509	1764	2375	1845	2139	2363	2419	1953
IGG1	1304	2431	1622	1787	2267	1791	2372	1896	1884	1549	2517	1804	1515	1678	1187	1605
FGB	2487	1390	858	1185	1686	42	1605	768	2703	2424	1033	1956	2086	2240	2290	828
TF	1260	1104	1547	1378	1143	1526	1162	1212	981	1175	960	1081	1251	918	1051	1023
FGA	1593	776	600	648	1090	49	990	435	1656	1475	636	1023	1368	1312	1392	514
IGKC	984	1466	884	973	1159	1028	1085	970	1023	1066	1074	950	893	887	874	904
FGG	1350	823	553	703	965	45	1020	557	1695	1252	677	1068	1101	1192	1335	549
SERPINA1	709	816	889	553	957	1183	708	804	827	1254	1100	872	674	716	605	473
C4B	1001	800	810	799	806	778	969	824	889	928	882	883	1042	852	1006	1060
IGHG2	971	1287	701	1011	1213	846	1043	988	813	895	1339	811	716	611	732	842
IGHM	467	1212	598	522	477	456	550	435	664	288	358	585	346	364	294	243
CFH	458	388	359	498	379	406	427	446	441	479	539	522	474	398	400	500
CP	452	414	563	502	377	370	352	362	387	500	491	450	583	437	436	404
IGHG3	634	987	578	707	679	598	790	679	757	685	978	582	746	717	589	653
PLG	433	311	428	416	353	356	364	341	410	338	370	362	339	322	382	366
APOA1	432	468	608	421	329	372	359	299	295	461	364	252	290	365	385	261
ITIH1	461	346	336	439	313	345	350	361	376	354	353	358	283	370	423	389
HP	340	253	438	250	317	291	173	290	388	423	487	207	566	395	331	289
FN1	184	189	109	451	386	294	451	488	409	286	324	169	237	327	403	374
C4BPA	351	233	309	262	291	262	339	288	555	361	228	316	372	340	349	290
C5	421	302	315	301	259	240	289	274	377	346	400	317	402	330	395	325
IGHA1	261	559	288	237	336	304	274	332	362	318	188	206	208	199	274	243
ITIH4	381	242	390	325	279	216	227	254	277	361	296	328	315	294	336	328
SERPINC1	347	277	285	325	295	324	315	314	322	348	336	319	283	297	289	276
TTR	382	247	369	455	232	274	166	268	206	249	239	224	168	385	263	309
ITIH2	312	268	277	377	231	255	269	253	263	238	252	220	155	274	279	266
CFB	195	141	201	184	208	203	205	172	178	221	216	196	272	131	147	240
IGLC2	190	247	205	131	236	195	195	212	222	195	251	136	172	180	168	138
HPX	232	227	246	211	154	150	118	154	135	182	208	152	176	144	193	184
F2	234	182	285	243	206	202	183	188	222	218	229	205	216	210	241	219
SERPINA3	243	173	201	213	146	161	147	147	182	176	225	198	221	223	253	180
HBA1	173	148	312	169	189	62	165	139	122	151	139	166	279	446	246	195
IGHG4	398	599	362	427	498	398	685	578	481	540	1111	488	391	380	364	371
RBP4	244	181	199	229	96	73	54	101	110	129	90	83	93	333	146	178
APOH	156	133	122	150	117	114	108	106	105	133	117	114	104	156	134	117
GSN	76	134	112	134	138	169	162	131	108	116	90	144	87	161	131	128
C1R	129	109	108	136	111	142	157	146	124	127	143	119	157	140	129	131
HBB	126	121	196	116	124	36	139	96	99	124	116	105	180	272	179	121
C8B	120	121	105	118	118	106	141	111	115	126	131	140	100	100	103	128
SERPIND1	133	84	131	97	99	111	94	95	102	120	95	148	129	108	131	121
C9	129	115	68	107	106	87	90	79	109	137	134	133	147	94	109	113
APOA4	64	100	142	83	96	125	118	94	90	121	116	89	50	108	78	68
KRT1	119	108	95	100	86	77	105	95	119	91	72	74	86	101	134	93
AMBP	103	121	72	99	74	101	71	86	96	134	86	83	74	166	103	84
C1QA	90	99	74	90	117	53	116	97	149	100	83	111	107	139	86	85
APOE	105	108	113	103	80	59	103	76	111	98	121	71	84	127	134	113
PROS1	94	62	70	80	77	62	95	85	161	90	68	99	89	122	97	71
A1BG	114	78	150	99	61	80	78	70	59	76	100	74	81	72	89	86
AGT	115	79	158	119	77	117	88	84	98	101	92	83	111	98	112	74
C1S	81	94	60	71	60	98	110	67	80	89	115	75	90	79	77	76
SERPING1	90	66	77	70	85	102	88	79	97	96	110	86	77	63	84	89
AHSG	52	38	39	59	70	81	65	91	50	58	56	78	64	46	37	112
HRG	86	87	61	68	79	73	77	81	74	124	88	81	77	78	78	112
GC	133	67	129	128	80	113	83	82	49	72	70	70	70	65	57	46
KNG1	98	71	97	71	65	59	68	61	66	77	91	85	81	71	87	84
C6	83	61	64	85	62	68	79	57	88	88	82	100	76	70	83	82
C7	102	102	43	122	48	62	62	50	91	70	94	67	87	63	77	81
SERPINF2	92	51	94	93	92	97	86	87	84	85	70	81	77	72	72	92
C8A	79	82	61	80	69	59	77	71	78	53	73	95	91	68	70	94
KRT9	97	46	50	86	53	44	86	77	109	61	58	68	72	76	90	61
CLU	87	84	79	85	79	57	53	58	60	65	87	60	60	69	66	89
CD5L	58	143	54	86	62	79	82	68	97	39	59	117	52	61	49	40
IGKV3D-20	29	123	46	116	102	68	99	103	64	70	127	55	0	49	28	101
PGLYRP2	72	77	61	93	59	76	84	74	82	82	64	67	52	57	82	76
PON1	77	66	99	103	52	68	64	89	80	42	58	38	51	77	81	51
C1QC	31	37	26	65	56	30	60	48	95	40	31	59	52	90	36	33
KLKB1	70	52	72	90	63	81	49	63	74	48	66	84	51	58	77	74
C1QB	54	55	34	64	83	45	75	87	111	50	45	68	47	112	63	44
SERPINA4	58	67	77	79	49	53	47	59	68	70	87	70	50	67	71	64
VTN	65	54	71	65	62	59	49	63	54	61	83	52	60	51	55	65
CFI	57	51	48	77	67	53	62	62	57	58	67	74	70	58	66	68
IGHV4-38-2	41	77	61	75	68	66	51	65	56	53	113	83	47	42	42	57
F13B	67	35	26	52	65	14	54	41	77	85	28	70	30	79	70	31
PZP	336	355	621	289	0	237	280	245	261	340	0	234	250	227	325	0
C2	52	48	61	53	50	55	45	55	36	57	53	38	63	26	59	67
ACTB	66	40	44	61	68	17	37	55	52	30	50	62	89	64	57	58
THBS1	31	19	72	20	18	74	5	68	46	29	39	54	51	46	69	29
TLN1	79	36	45	59	70	0	10	46	42	3	33	60	78	61	43	32
ITIH3	66	37	40	39	17	47	42	37	36	72	44	37	50	42	52	31
IGFALS	65	27	58	71	51	71	50	52	48	45	37	60	46	49	44	68
IGA2	90	118	86	88	135	111	127	105	95	98	70	83	84	69	87	102
KRT10	63	89	60	34	38	31	49	39	69	36	20	33	32	38	66	37
F13A1	57	43	33	57	51	4	49	26	67	70	21	60	38	67	80	39
CPN2	44	54	58	53	45	49	41	41	40	38	57	47	33	47	61	45
IGKV4-1	33	46	36	48	50	37	39	39	41	33	91	58	30	32	35	35
F12	52	47	42	45	32	59	40	37	57	45	44	50	24	41	40	41
IGK	932	1392	815	933	1100	970	1031	920	973	1016	1015	926	851	845	825	863
JCHAIN	24	84	30	42	24	24	39	23	36	18	27	44	20	32	25	18
C8G	41	41	35	36	38	44	35	35	50	37	40	55	42	36	39	36
IGHV3-30	31	32	23	24	36	38	26	30	44	34	153	22	28	31	38	25
VWF	99	8	6	23	6	4	10	34	92	71	12	6	23	44	107	6
APCS	52	63	65	52	47	42	27	43	40	39	44	34	52	45	33	32
SERPINF1	51	48	43	33	36	35	29	38	34	43	43	47	47	69	59	48
IGHV5-51	29	54	37	49	40	22	33	33	48	35	99	38	22	34	24	41
APOL1	43	35	44	43	38	32	40	33	46	23	38	38	46	40	42	46
HPR	151	130	171	122	139	125	127	129	182	179	213	112	235	164	121	135
FBLN1	19	47	23	28	39	35	55	32	18	41	45	36	18	35	42	36
IGLV3-21	35	50	41	33	58	0	38	58	26	29	0	0	47	30	0	50
F5	46	22	49	48	23	12	12	24	32	41	35	30	21	30	53	10
FCN3	59	10	25	26	11	32	27	27	25	24	30	53	29	49	44	18
MST1	32	19	12	30	33	18	28	24	34	34	23	27	42	34	27	29
FCGBP	20	14	10	65	12	21	36	21	21	26	38	12	21	54	22	21
IGHV3-9	36	86	35	20	31	42	25	38	40	23	49	29	15	30	49	51
IGHV3-23	33	46	45	38	35	39	0	35	57	46	129	39	29	39	42	29
IGD	6	16	0	16	79	60	85	36	0	13	9	31	8	14	10	13
CPB2	28	29	29	29	25	23	14	18	30	32	25	35	29	29	27	21
CFP	23	24	23	29	19	21	25	21	20	19	22	22	26	28	22	19
LPA	8	3	45	6	14	13	73	6	129	8	0	9	30	2	15	0
SERPINA7	18	15	18	22	25	20	17	28	26	34	25	38	16	17	21	22
IGHV4-61	0	0	0	0	0	0	0	0	0	0	0	0	71	0	0	0
LBP	34	21	23	26	20	25	16	15	27	42	21	41	54	27	26	29
KRT2	34	82	41	27	24	14	31	25	42	20	15	19	26	21	45	19
IGL1	146	200	163	105	190	146	176	175	186	151	201	111	136	154	142	119
TCF20	0	0	0	0	0	0	0	1	0	0	0	0	0	0	0	0
FLNA	36	7	5	19	25	0	5	9	16	0	12	61	40	22	16	6
IGHV3-30-3	0	48	0	0	0	0	0	0	0	0	99	0	0	0	0	0
IGHV3-49	12	18	25	12	31	10	15	18	14	10	48	22	16	15	2	28
CPN1	14	19	23	21	12	26	18	20	20	11	24	20	16	14	19	21
SAA4	24	16	32	18	24	17	8	8	27	22	19	17	24	21	20	16
AFM	18	13	24	17	12	22	6	23	11	14	25	15	10	8	17	19
APOC3	22	23	38	17	14	12	6	9	18	17	27	20	16	27	28	26
IGKV1-8	18	25	24	19	22	13	32	19	17	22	47	19	21	19	20	15
TTN	0	0	1	2	0	0	0	2	2	2	2	0	1	0	2	1
IGHV3-7	18	45	19	16	29	15	21	22	22	18	23	16	15	15	18	20
LRG1	27	19	14	19	12	14	7	15	22	34	22	21	42	25	24	20
APOD	15	20	34	27	16	15	9	15	18	14	15	8	10	17	28	17
SERPINA5	16	22	14	24	29	22	13	24	14	20	25	26	7	10	10	37
SERPINA10	19	5	34	24	13	13	15	11	17	5	16	17	15	8	20	16
ORM2	19	8	19	12	12	19	13	23	19	15	20	14	21	19	17	18
PROC	26	10	17	36	10	9	7	14	25	11	20	11	11	13	28	19
FCN2	10	0	0	13	6	10	9	15	20	4	15	16	17	3	21	17
LGALS3BP	12	15	48	15	12	5	5	11	14	17	22	19	27	14	30	16
CNDP1	22	7	37	25	18	15	9	19	26	13	11	18	10	22	26	30
IGHV3-74	27	31	22	28	34	25	22	29	32	23	33	39	29	30	37	32
HABP2	19	16	17	14	10	7	11	11	18	18	25	17	15	19	16	17
IGHV1-18	12	15	15	17	22	7	8	18	11	9	49	8	15	24	12	23
CFHR1	45	32	34	24	42	38	36	39	47	50	42	47	31	26	40	38
SERPINA6	19	8	18	17	22	16	13	21	14	20	13	23	14	15	14	15
C4BPB	15	8	8	9	9	12	21	11	34	14	8	16	14	17	20	9
IGHV3-72	15	25	18	18	15	22	17	16	13	11	13	20	11	16	18	22
CLEC3B	11	17	11	23	18	18	22	13	11	15	18	12	16	13	13	16
F11	15	7	25	15	9	24	9	22	10	21	15	14	8	8	19	13
IGKV2-40	15	16	9	26	11	22	15	15	14	13	23	16	8	20	13	10
MASP1	16	7	9	16	4	12	16	5	13	5	16	5	14	12	9	11
PCYOX1	14	18	23	25	4	8	18	9	8	9	13	16	11	10	11	18
F9	18	14	23	17	18	11	9	12	17	16	16	21	18	18	20	11
IGKV1-39	8	21	0	9	7	6	16	9	17	18	42	22	17	15	13	18
APOM	29	22	21	30	2	6	4	6	7	8	12	3	24	23	29	18
IGKV3D-15	0	18	6	11	10	5	12	5	9	12	18	0	0	7	8	8
ADIPOQ	2	12	37	18	0	11	11	4	16	14	5	4	16	17	29	5
PF4	17	8	17	0	12	22	0	23	13	7	8	17	13	11	22	7
GPX3	13	10	18	16	11	12	5	7	11	10	10	14	8	7	15	9
IGKV1-5	0	15	0	16	0	0	0	16	0	0	34	0	0	0	0	0
APOC1	12	10	24	16	9	14	14	9	13	9	14	10	12	14	19	12
MYH9	72	0	0	3	8	0	7	8	8	0	2	27	54	10	13	4
MBL2	9	13	2	28	9	7	0	0	18	17	20	0	17	16	1	16
PLTP	15	12	8	22	16	16	14	12	12	9	13	12	15	13	14	9
SHBG	9	21	28	13	9	24	32	9	11	6	5	8	7	8	10	11
COL12A1	0	2	3	2	0	2	0	1	0	1	2	0	0	2	2	3
GPLD1	29	14	19	23	5	12	7	12	10	16	15	12	8	17	15	6
C4A	974	781	0	786	784	763	951	804	864	884	867	856	1000	835	984	1022
IGHV3-53	16	40	15	24	35	0	12	25	28	17	55	19	0	24	0	16
COMP	5	19	4	9	9	7	6	9	6	7	13	19	7	10	7	17
IGKV1-33	7	11	9	13	14	10	8	13	10	16	19	10	8	13	6	11
IGHV4-39	0	0	0	0	0	0	0	0	0	0	211	0	0	0	0	0
QSOX1	17	29	6	25	4	9	5	9	11	4	30	8	8	15	13	11
BCHE	9	13	11	14	9	9	12	16	13	9	13	17	4	7	6	14
IGHV3-21	0	47	16	0	23	0	0	17	28	19	54	20	16	20	0	20
IGKV3-20	0	145	0	0	0	0	0	0	0	0	0	0	0	0	0	108
TSC22D2	1	0	0	0	0	0	0	0	0	0	0	0	0	0	0	0
TGFBI	11	4	11	14	7	10	9	7	4	7	16	15	5	9	15	11
PRG4	17	8	8	10	6	11	4	7	13	5	17	21	12	6	22	20
EFEMP1	8	25	8	7	6	5	12	8	13	20	16	9	9	22	9	6
CD14	15	1	13	8	12	12	15	15	12	14	18	11	17	14	14	17
IGHV1-69	6	20	5	12	9	10	4	10	13	11	39	7	10	8	8	13
IGKV3-11	7	13	10	18	14	9	11	9	11	7	18	11	9	17	10	8
IGHV1-2	8	21	14	14	10	14	11	12	5	5	17	21	5	6	16	15
IGHV2-26	0	14	13	15	6	9	10	11	0	0	24	6	11	0	0	11
APOC4	23	5	19	14	10	13	9	11	11	7	12	9	4	13	13	11
IGLV4-69	0	10	10	11	14	8	2	10	12	9	45	6	6	7	5	9
IGHV3-15	8	8	7	6	12	10	9	5	11	7	20	7	8	12	10	15
ORM1	17	10	22	14	17	17	14	15	21	12	21	24	17	17	16	19
IGKV1-16	0	16	0	14	14	0	0	0	9	0	23	10	7	12	3	0
CA1	17	4	15	5	3	0	8	3	3	6	4	13	17	32	10	7
IGE	1	9	3	2	2	1	0	2	6	5	15	1	2	0	1	4
ATRN	7	10	4	14	2	9	11	18	7	6	14	10	1	4	5	9
ACTA1	38	24	29	33	34	6	20	28	27	11	31	32	44	36	32	27
PIGR	10	23	17	8	5	6	7	10	9	7	4	14	8	6	14	8
KRT86	2	0	0	0	0	0	0	0	22	1	0	2	3	6	0	29
IGHV3-48	0	64	18	0	36	0	0	18	0	0	14	20	0	0	0	21
IGHV1-24	7	6	0	0	0	0	0	4	8	14	71	4	0	10	0	0
IGKV1D-8	2	0	0	12	0	13	20	0	5	11	19	0	0	0	0	0
TFRC	12	0	8	8	1	2	9	6	5	11	11	12	22	6	7	9
IGKV1D-12	0	0	0	0	0	0	0	0	0	0	40	0	0	0	0	0
IGLV1-51	0	13	10	8	10	2	4	9	4	0	15	0	9	11	0	8
APMAP	13	10	19	11	2	8	5	5	7	9	6	8	8	4	10	7
IGHV3-64D	4	10	9	8	13	7	2	4	4	4	10	10	5	10	2	9
IGHV3-73	7	8	8	6	9	7	7	10	7	6	21	4	4	9	3	8
VCL	18	10	7	7	7	0	0	8	9	0	8	13	16	6	9	5
IGHV2-5	0	19	6	10	13	7	0	10	8	10	6	7	0	7	12	9
BTD	11	4	5	11	9	0	1	5	3	8	11	10	7	9	12	11
IGHV3-13	0	30	0	0	10	7	9	0	15	14	20	18	0	0	0	16
LCAT	13	10	9	8	5	4	5	8	8	16	13	6	3	6	1	7
F10	8	4	10	9	10	3	5	4	8	7	6	8	5	6	9	9
IGKV1-27	0	22	20	18	16	11	23	19	17	17	30	0	0	0	18	0
IGHV3-43	13	26	13	0	16	19	8	15	0	0	0	16	11	0	14	15
CST3	5	5	2	6	2	2	2	3	6	5	6	3	0	24	3	3
NEK4	0	0	0	0	0	0	0	0	0	0	0	1	0	2	0	0
JUP	1	2	0	0	0	0	0	0	0	0	1	0	0	0	1	0
PLEK	14	3	16	14	13	0	0	8	11	0	8	12	12	5	4	4
HBD	54	55	70	49	51	0	65	42	47	52	52	53	76	105	79	52
IGM	0	795	451	363	358	0	365	288	0	209	0	406	0	0	247	0
PROZ	4	0	3	6	8	0	1	4	5	2	9	9	8	7	7	6
IGHV4-28	5	9	0	3	5	8	7	6	9	6	8	4	6	7	9	5
IGLV1-44	4	4	11	6	7	5	0	4	3	2	8	0	2	5	2	6
BARD1	0	0	0	0	0	0	0	0	0	0	0	0	0	2	0	0
IGLV3-25	3	0	0	1	6	3	2	0	5	0	8	0	0	5	4	4
AZGP1	8	8	3	13	1	0	3	3	10	2	13	4	4	12	2	3
IGKV2-24	6	6	8	13	4	5	5	3	4	0	4	0	6	6	5	6
APOA2	6	13	24	9	6	5	3	6	4	2	3	2	3	4	5	7
IGKV1-17	5	9	9	9	3	9	4	5	0	6	6	10	2	8	4	8
KRT14	17	14	15	9	12	3	11	4	12	8	0	8	0	6	10	9
IGHV1-46	7	13	5	19	5	4	6	0	21	11	20	11	14	13	12	19
IGKV2-28	0	0	0	0	0	25	16	0	0	0	33	0	0	21	16	0
SAA1	4	9	16	6	0	0	0	0	2	0	8	0	19	7	12	0
CETP	0	2	4	16	8	4	9	11	0	2	9	5	9	2	4	9
TPM4	14	4	5	4	12	0	0	5	3	0	11	3	14	0	0	2
PPBP	5	4	12	5	7	10	0	11	4	3	6	7	11	8	9	4
TNXB	1	3	2	2	1	0	1	4	0	2	8	1	1	5	2	11
KRT16	9	3	12	4	17	4	12	0	11	1	2	10	6	5	3	0
MAN1A1	3	1	9	4	2	3	0	2	4	4	4	3	5	4	2	7
CRP	0	0	0	0	1	0	0	0	2	6	6	14	27	7	16	8
H1F0	0	0	0	0	0	0	0	0	0	0	0	0	0	0	0	1
F7	7	0	5	7	4	1	0	0	8	12	4	4	7	2	6	3
ARID4A	2	0	0	0	1	0	0	0	0	0	1	0	1	0	0	0
TUBB1	18	0	0	5	4	0	0	4	9	0	8	20	12	0	0	0
SLC4A1	8	0	0	2	0	0	3	0	4	5	0	6	7	23	17	0
IGHV2-70D	6	5	3	8	5	5	3	6	0	2	12	5	10	6	0	7
IGHV3-11	0	39	17	0	19	0	0	20	0	0	14	0	14	0	0	0
FERMT3	12	0	5	2	9	0	0	2	2	0	2	9	9	10	4	0
LDHB	4	2	2	6	4	7	1	2	0	0	4	2	2	2	4	2
PRX	0	0	0	3	1	0	0	0	0	0	0	0	0	1	0	0
PRDX2	6	3	8	6	4	0	0	3	0	6	2	4	12	10	8	4
CFD	4	5	0	0	0	0	3	0	3	9	2	11	6	25	6	3
HGFAC	4	6	0	6	2	1	4	4	5	0	5	2	0	1	3	3
GAPDH	9	3	6	4	6	0	1	3	2	1	2	5	10	9	5	3
DNAH10	0	0	0	0	0	0	0	0	1	0	0	0	0	0	0	0
IGLV3-10	0	7	5	0	7	9	0	4	0	0	1	0	3	9	2	0
MMRN1	3	1	10	0	0	0	0	3	2	3	3	7	7	5	19	0
PKM	7	4	4	8	8	0	0	8	3	0	6	9	7	5	0	0
ATG2B	0	0	2	0	0	0	0	0	0	0	1	2	0	0	0	0
DBH	6	5	0	9	3	5	0	3	5	6	5	0	0	0	4	0
DAB2	0	0	0	0	0	0	0	0	0	0	0	0	0	0	0	1
SELENOP	5	9	7	5	5	0	0	0	3	3	8	2	5	4	5	0
IGHV1-3	0	0	0	15	8	0	0	10	25	9	21	0	8	15	0	0
TAF1	0	0	1	0	0	0	0	0	0	0	1	0	0	1	0	1
IGLV1-40	1	7	9	5	4	7	0	0	0	3	7	0	1	0	0	0
IGLC3	0	251	0	0	0	0	196	0	0	0	0	0	0	0	0	0
ANKRD28	0	0	0	0	1	0	0	0	0	0	0	0	0	0	0	0
GVINP1	0	0	0	3	0	1	0	0	0	0	0	0	0	1	0	0
CWH43	0	0	0	0	0	0	0	0	2	0	0	0	0	0	0	0
IGLV2-11	2	2	2	0	5	3	4	5	0	0	14	5	0	7	4	4
IGHV4-30-2	0	0	0	55	0	0	0	0	52	0	67	0	0	0	0	0
TIE1	0	0	0	0	0	0	0	0	0	1	0	0	0	0	0	0
TNC	0	1	0	0	1	0	0	0	26	0	0	0	0	13	4	0
MCM10	0	0	0	0	0	0	0	0	0	1	0	0	0	3	3	0
IGLV3-1	0	0	0	0	0	0	0	0	0	0	4	0	0	0	0	0
IGLV5-45	0	0	0	0	0	3	0	0	0	0	0	0	0	2	0	2
ILK	9	0	2	5	4	0	0	3	6	0	0	9	7	3	4	2
IGKV6-21	7	2	4	7	0	0	4	6	3	0	3	3	3	5	4	4
IGHV5-10-1	0	0	0	0	0	1	0	0	6	0	15	0	0	7	0	0
S100A9	0	5	3	0	0	4	0	3	3	0	0	4	3	5	6	0
IGLV3-19	0	3	0	7	5	0	1	0	3	0	14	2	0	0	2	4
HERC2	2	0	0	1	0	0	0	0	0	0	2	0	2	0	0	0
CFHR5	0	0	0	5	8	10	10	10	6	8	7	10	0	7	0	6
TUBB	13	3	0	9	9	0	0	3	3	0	3	17	15	4	0	0
ARHGAP21	0	0	0	0	0	2	0	0	0	0	0	0	2	1	0	0
ACTN1	5	0	0	0	13	0	5	9	0	0	2	10	4	0	0	0
IGHV6-1	0	1	1	2	1	3	0	0	2	1	1	2	0	0	1	3
FETUB	3	2	9	1	6	5	7	1	0	3	0	4	2	0	0	3
MASP2	4	2	0	3	0	0	3	0	0	0	4	0	2	4	1	0
YWHAZ	5	0	0	0	4	0	0	0	5	0	4	3	7	7	3	0
SHROOM3	0	0	0	0	0	0	0	1	2	0	0	0	0	0	0	0
PARVB	11	0	4	0	3	0	0	0	0	0	2	6	5	6	3	0
CAMP	0	0	0	0	0	0	0	0	0	0	0	0	0	0	4	0
MINPP1	0	0	6	3	0	0	0	4	0	0	0	0	0	0	5	3
RIF1	2	0	0	0	0	0	0	0	0	0	0	0	2	0	0	0
PPP1R10	0	0	5	1	0	1	1	0	0	0	1	0	1	0	3	2
ERN1	0	0	0	0	0	0	0	0	0	0	0	1	3	0	0	0
B2M	0	0	0	0	0	0	0	0	0	0	0	0	0	9	0	0
HTT	2	0	2	0	2	0	4	0	0	0	4	0	0	0	0	0
C1RL	9	7	0	0	0	0	0	0	13	10	12	9	0	0	11	9
KRT5	10	16	0	0	0	0	9	0	8	5	0	6	0	4	10	5
IGHV3-20	0	0	0	0	0	0	0	11	17	0	11	0	0	0	0	0
CAT	3	0	3	0	0	0	0	0	2	1	0	0	7	12	9	0
IGKV1-13	0	0	0	0	0	7	0	0	1	0	0	0	4	0	0	0
KRT6B	16	0	15	0	18	10	13	0	15	0	8	10	0	0	14	0
LUM	0	5	0	0	0	3	0	1	0	4	3	2	0	6	0	3
TSHZ2	0	0	0	0	3	0	3	0	0	0	0	0	0	0	0	0
SPTBN4	0	1	0	0	1	0	1	0	0	0	0	0	0	0	0	0
NACA	0	0	0	1	0	0	0	0	0	0	1	0	0	0	0	3
ANTXR2	0	0	0	0	0	0	0	0	0	0	0	0	0	0	8	0
CFL1	4	2	3	0	2	0	0	0	0	0	2	4	6	9	4	1
ANK3	0	0	0	0	1	0	1	1	0	0	0	0	0	0	0	0
PNP	7	3	0	3	0	0	0	0	0	0	0	3	8	0	6	0
STOM	3	0	6	0	0	0	0	0	1	0	0	3	8	11	8	0
IGLC7	0	0	0	0	0	0	0	0	66	0	106	0	0	0	0	0
IGLV3-9	0	0	0	34	0	0	0	0	0	0	0	0	0	0	0	0
IGHV3-33	0	34	0	29	0	0	0	0	48	39	0	0	0	0	0	0
RAP1B	6	0	0	2	0	0	0	0	6	0	0	3	6	7	0	2
RNASE1	0	0	0	0	0	0	0	0	0	0	0	0	0	12	0	0
IGLV9-49	0	1	3	1	0	0	0	2	2	0	4	0	0	0	0	2
OBSCN	0	1	0	0	0	2	0	0	0	0	0	0	0	0	0	0
IGLV2-18	0	0	0	3	3	5	0	6	4	0	1	0	0	0	0	0
ECM1	0	0	0	1	3	1	10	2	0	0	5	0	0	0	0	3
ZNF177	0	0	0	0	0	0	0	0	0	0	0	0	0	0	1	0
SUCO	0	0	0	0	2	3	0	0	0	0	0	0	0	0	0	0
FHOD3	0	0	0	0	0	0	1	0	0	0	0	0	0	0	1	0
CFHR2	19	11	12	5	0	15	0	12	12	12	0	13	0	10	14	14
THBS4	0	3	0	3	0	0	0	4	1	5	0	4	0	0	2	7
HDAC5	0	0	0	0	0	0	0	0	0	0	0	0	0	0	1	0
LYZ	4	4	0	0	0	0	0	0	0	0	0	0	2	7	0	0
COLEC11	2	0	0	1	0	0	0	0	4	1	0	2	0	2	1	2
TUBA1B	5	2	0	0	3	0	0	0	2	0	0	5	5	0	0	0
IGHV4-4	0	0	0	53	46	0	33	42	51	0	0	0	0	0	0	0
TBC1D22A	1	0	0	0	0	0	0	0	0	0	0	0	0	0	0	0
COL6A3	0	1	1	0	0	0	0	0	0	2	0	5	0	1	1	0
IGKV2D-29	0	0	0	0	0	0	0	0	0	0	16	0	0	0	0	0
APOA5	2	0	2	0	0	0	0	0	2	0	3	4	0	0	6	5
DNAH3	0	0	0	0	0	0	0	0	0	0	0	0	0	0	0	1
LTF	0	0	0	0	1	9	0	0	0	0	0	0	0	0	0	0
MKI67	0	0	0	2	0	0	0	0	0	0	0	0	0	0	1	0
IGLV6-57	0	0	0	0	0	0	1	0	0	0	0	0	0	0	0	2
TAGLN2	4	6	0	0	1	0	0	0	3	0	3	5	4	0	3	2
APOF	3	0	0	1	2	0	2	0	4	4	2	0	0	3	2	0
ANGPTL6	0	0	0	0	5	0	0	0	0	0	0	0	0	6	0	0
ARFGEF3	0	0	0	0	0	1	0	0	0	0	0	0	0	2	0	0
CAP1	5	0	2	2	2	0	0	0	0	0	2	6	2	0	0	0
CDK19	0	0	0	0	0	0	0	0	1	0	0	0	0	0	0	0
SPTA1	0	0	0	0	0	0	0	1	0	1	0	0	0	2	0	0
SEMA6D	0	0	0	0	0	0	0	0	3	0	0	0	0	0	0	0
SIRPA	0	0	0	0	1	0	0	0	0	0	0	0	0	0	0	0
HBG1	0	0	0	0	0	0	0	0	0	0	0	0	14	23	0	16
FNDC1	0	0	0	0	0	0	0	0	0	0	0	1	0	0	1	0
IGKV2-30	0	16	9	20	10	22	0	0	0	0	0	0	0	0	0	0
TTF2	0	0	0	0	0	0	0	0	0	0	0	0	0	1	0	0
ITGA2B	3	0	0	0	0	0	0	0	3	0	0	3	4	5	0	0
HRNR	10	0	0	0	0	0	0	0	2	0	0	0	0	2	0	0
PRDX6	6	3	1	0	2	0	0	0	2	0	1	0	3	3	4	0
LTBP1	0	0	3	0	0	0	0	1	2	0	0	4	3	3	3	0
S100A8	0	0	0	0	0	0	0	0	0	0	0	0	6	3	7	0
COL18A1	0	1	0	0	0	0	0	0	1	2	0	0	0	9	0	0
GDI2	5	0	0	0	0	0	0	0	0	0	0	0	3	2	3	0
BCAN	0	0	1	0	0	0	0	0	0	0	0	0	0	0	0	1
TRMT1L	0	0	0	1	0	0	0	0	0	0	0	0	0	0	0	0
RNASE4	0	0	0	0	0	0	0	0	0	0	0	0	0	7	0	0
CALR	1	0	0	0	2	0	0	0	0	0	1	0	2	2	0	1
KRT33B	0	0	0	0	0	0	0	0	7	0	0	0	0	0	0	20
IGLV3-27	0	0	0	0	0	0	0	0	7	0	0	0	0	0	0	0
ITGB3	2	0	0	0	0	0	0	0	0	0	0	2	1	5	0	0
NEB	0	0	1	0	0	0	0	0	0	0	0	0	1	0	0	0
IGHV1-8	0	11	0	0	0	0	0	9	0	0	17	0	0	0	0	0
ADGRV1	0	0	0	0	0	0	1	0	0	0	0	0	0	0	0	0
AVIL	0	0	0	0	1	0	0	0	0	0	0	0	0	0	0	0
SYNE2	0	0	0	0	1	0	0	0	0	0	0	0	0	0	0	0
PCOLCE	2	0	0	0	0	0	0	0	0	4	0	0	0	2	0	0
PCLO	0	0	0	0	0	0	0	0	0	0	0	0	0	1	0	0
IGLC6	0	0	0	0	136	0	132	0	0	0	0	0	0	0	0	0
SYNRG	0	0	0	0	0	0	0	0	0	0	0	0	0	0	0	2
HSPA5	0	0	4	1	1	0	0	0	2	0	0	1	1	0	0	3
LCP1	1	2	0	0	0	1	0	0	1	0	0	0	0	1	0	0
SDK1	0	1	0	0	0	0	0	0	0	1	0	0	0	2	0	0
LAMA3	0	0	0	0	0	0	0	0	0	0	0	0	0	0	0	1
ZNF407	0	0	0	0	0	0	0	0	0	0	0	0	0	0	1	0
PCDHA3	1	0	0	0	0	0	0	0	0	0	0	0	0	0	0	0
ANG	0	0	3	3	0	0	1	2	0	0	0	0	0	3	0	0
SYNE1	0	1	0	0	0	0	0	0	0	0	0	0	0	0	0	0
SP140L	0	0	0	0	0	0	0	0	0	0	0	0	0	1	0	0
ALDOB	0	4	0	0	0	0	0	0	0	0	0	0	0	0	0	1
IGFBP2	0	0	0	0	0	0	0	0	0	4	0	0	0	3	2	0
PPIA	4	0	0	0	0	0	0	0	0	0	0	0	6	4	0	0
BCL9L	0	0	0	0	0	0	0	0	0	1	0	1	0	0	0	0
PLCH1	0	0	0	0	0	0	0	0	0	0	0	1	0	0	0	0
IGLV4-60	0	0	3	0	0	0	0	0	0	0	0	0	2	0	0	3
ACTR3	2	0	1	0	2	0	0	2	0	0	0	0	0	0	0	0
ZNF594	0	0	0	0	0	0	0	1	0	0	0	0	0	1	0	0
DNAH17	0	0	0	0	2	0	0	0	0	0	0	0	0	0	0	0
IGLV2-8	0	0	4	0	0	6	0	0	0	0	0	0	0	0	0	0
PARP8	0	0	1	0	0	0	0	0	0	0	0	0	0	0	0	0
HSPG2	0	0	0	0	0	0	0	0	0	0	0	0	0	1	1	0
PON3	0	0	7	11	0	0	0	0	0	0	0	0	0	0	0	0
CEP290	0	0	0	0	0	0	1	0	0	0	0	0	0	0	0	0
KRT31	0	0	0	0	0	0	0	0	9	0	0	0	0	0	0	20
PF4V1	0	0	0	0	0	0	0	0	0	0	0	0	0	9	0	0
IGFBP3	0	0	0	2	0	0	0	0	0	0	0	3	0	0	0	0
CMYA5	0	0	1	0	0	0	0	0	0	1	0	0	0	0	0	0
IGLV1-36	0	0	0	0	0	3	0	0	0	0	7	0	0	0	0	0
SHANK1	0	2	0	0	1	0	0	0	0	0	0	0	0	0	0	0
SCG2	0	0	0	0	0	0	0	0	0	0	0	0	0	0	1	0
ARID1B	0	0	0	0	0	0	0	0	0	0	0	0	0	0	1	0
TENM1	5	0	0	0	0	0	0	0	1	0	1	0	0	0	0	0
GCN1	0	0	0	0	0	0	0	0	0	0	0	1	0	0	0	0
IGHV3-43D	0	0	0	0	0	0	0	0	0	0	47	0	0	0	0	0
DNAH12	0	0	0	0	0	0	0	0	0	0	0	0	1	0	0	0
DSP	0	3	0	0	0	0	0	0	0	0	0	0	0	0	4	0
GP5	0	0	0	0	0	12	0	4	0	0	0	0	0	0	0	0
CFHR4	0	0	0	0	0	1	0	0	1	1	3	0	0	0	0	0
KIAA1211L	0	0	0	0	0	0	1	0	0	0	0	0	0	0	0	0
PGK1	1	0	0	0	0	0	0	0	0	0	0	1	1	0	0	0
CASP8AP2	0	0	0	0	0	0	0	1	0	0	0	0	0	0	0	0
VCP	2	0	0	0	2	0	0	0	0	0	0	1	2	1	0	0
CNOT1	0	0	3	2	0	0	0	0	0	0	0	0	0	0	0	0
FAAH2	0	0	0	0	0	0	0	0	0	0	0	0	0	0	1	0
POSTN	0	0	0	0	0	0	0	0	0	0	0	0	0	1	3	9
PCCB	0	0	0	0	0	0	0	0	0	0	0	1	0	0	0	0
SMG1	0	0	1	0	0	0	0	0	0	0	0	0	1	0	1	0
HID1	1	0	0	0	0	0	0	0	0	0	0	0	0	0	0	0
MYOM1	0	0	0	0	0	2	1	1	0	0	0	0	0	0	0	0
IGHV1-69-2	0	0	0	0	0	0	1	0	0	0	5	0	0	0	0	0
UBE3B	0	0	0	0	0	0	0	0	0	0	0	0	0	0	0	1
ADAMTS13	0	0	0	2	0	0	0	0	0	0	1	3	0	0	0	0
SPEN	0	0	0	0	0	0	0	0	1	0	0	0	0	0	0	0
PRR20G	0	0	0	0	0	0	0	0	0	0	0	0	0	1	0	0
DIDO1	0	0	0	0	0	0	0	0	0	1	0	0	0	0	0	0
VASN	0	0	0	0	0	0	0	0	0	0	1	0	1	1	0	2
GP1BA	0	0	0	1	0	0	0	0	0	0	0	0	3	1	0	0
TNRC18	0	0	0	0	0	0	0	1	0	0	0	0	0	0	0	0
KIF26B	0	0	0	0	0	0	0	0	0	0	0	0	0	0	0	1
PRUNE2	0	0	0	0	0	0	0	0	0	0	0	0	2	0	0	0
PCSK9	0	0	5	0	0	0	0	0	0	0	0	0	0	0	0	0
PDZD2	0	0	0	0	0	0	0	0	1	0	0	0	0	0	0	0
IGHV1-45	0	1	0	0	0	0	0	0	0	0	0	0	0	0	0	0
IHH	0	0	0	0	0	1	0	0	0	1	0	0	0	0	0	0
PDIA3	0	0	0	1	0	0	0	0	0	0	0	0	0	0	0	0
MAGI2	0	0	0	0	0	0	0	0	0	0	0	0	0	1	0	0
PXN	0	0	0	0	0	1	0	0	1	0	0	0	0	0	0	0
CASP10	1	0	0	0	0	0	0	0	0	0	0	0	0	0	0	0
MFAP4	0	1	0	0	0	0	0	0	0	0	0	0	0	4	0	1
KDM5B	0	0	0	0	0	0	1	0	0	0	0	0	0	0	0	0
LAMA5	1	0	0	0	0	0	0	0	0	0	0	0	0	0	0	0
SPINK5	0	0	0	0	0	0	0	0	0	0	0	0	1	0	0	0
COL4A2	0	0	0	0	0	0	0	0	0	0	0	1	0	0	0	0
PEPD	0	0	0	0	0	0	0	0	0	0	0	2	0	0	0	0
MMP2	0	1	0	0	0	2	0	0	0	0	3	0	0	0	0	0
LCN2	0	0	0	0	0	0	0	0	0	3	0	0	0	5	0	0
ALDOA	0	1	0	0	0	0	0	0	0	0	0	0	0	0	0	0
MPO	0	0	0	0	0	0	0	0	0	0	0	0	0	1	0	0
ANKRD11	0	0	0	0	0	0	0	0	0	1	0	0	0	0	0	0
FTL	0	0	0	0	0	0	0	0	0	0	0	0	0	6	0	1
IGHV1-58	0	0	0	0	0	0	0	0	0	0	6	0	0	0	0	0
MAP1S	0	0	0	0	0	0	0	0	0	1	0	0	0	0	0	0
MYH15	0	0	0	0	0	0	0	1	0	0	0	0	0	0	0	0
CRTAC1	0	2	0	2	0	0	0	0	0	0	0	0	0	0	0	0
HLA-A	0	0	0	0	0	0	0	0	0	0	0	0	0	0	2	4
IGKV1D-17	0	0	0	0	0	0	0	0	0	0	2	0	0	0	0	0
FLG	0	0	0	0	0	0	0	0	0	0	0	0	0	0	4	0
COL3A1	0	0	0	0	0	1	0	0	0	0	0	0	0	0	0	0
LZTS2	0	0	0	0	0	0	0	0	0	0	0	2	0	0	0	0
LDHA	0	0	0	0	0	0	0	0	0	0	0	0	0	4	2	0
CSRP1	0	0	0	0	0	0	0	0	0	0	0	0	2	0	0	0
GP1BB	0	0	0	0	0	0	0	0	0	0	0	0	1	0	0	0
LRRIQ1	0	0	0	1	0	0	0	0	0	0	0	0	0	0	0	0
PTPRK	0	0	0	0	0	0	0	0	0	0	0	0	0	0	1	0
KPRP	0	3	0	0	0	0	0	0	0	0	0	0	0	0	0	0
IGHV7-4-1	0	0	0	0	0	0	0	0	0	0	11	0	0	0	0	0
PLCB2	0	0	0	0	0	0	0	0	0	0	0	0	0	1	0	0
EZR	0	0	0	0	0	0	0	0	0	0	0	0	0	1	0	0
SOX30	1	0	0	0	0	0	0	0	0	0	0	0	0	0	0	0
ADAMTSL4	0	0	0	0	0	0	0	0	0	0	0	0	0	1	0	0
DNAH8	0	0	0	0	0	0	0	0	0	0	0	0	0	0	0	1
ADH1B	0	0	0	0	0	0	0	0	0	0	0	0	0	0	1	0
LRP1	0	0	1	0	0	0	0	0	0	0	0	0	0	0	0	0
RIN3	0	0	0	0	0	0	0	0	0	0	2	0	0	0	0	0
COL1A1	0	0	0	0	1	0	0	0	0	0	0	0	0	0	0	0
HECTD4	0	0	0	0	0	0	0	0	0	0	0	0	0	1	0	0
PLA2G7	0	0	0	2	0	0	0	0	0	0	0	0	2	0	0	0
CD109	0	0	0	0	0	0	0	0	0	0	0	0	0	1	0	0
CHL1	0	0	0	0	0	0	0	1	0	0	0	0	0	0	0	0
MMP16	0	0	0	0	0	0	0	0	0	0	1	0	0	0	0	0
SPARCL1	0	0	1	0	0	0	0	0	0	0	0	0	0	1	0	0
NUP155	0	0	0	0	0	1	0	0	0	0	0	1	0	0	0	0
SPP2	0	2	0	0	0	0	0	0	0	0	0	0	0	0	0	1
CCDC77	0	0	0	0	0	0	0	0	1	0	0	0	0	0	0	0
CDH5	0	0	0	0	0	0	0	0	0	0	0	0	0	0	0	1
SLC12A5	0	0	0	0	1	0	0	0	0	0	0	0	0	0	0	0
KRT85	0	0	0	0	0	0	0	0	0	0	0	0	0	0	0	16
ENO1	0	0	0	0	0	0	0	0	0	0	0	1	0	3	0	0
SMTNL1	0	0	0	0	1	0	0	0	0	0	0	0	0	0	0	0
ZNF638	0	0	0	1	0	0	0	0	0	0	0	0	0	0	0	0
ENPP2	0	0	2	0	0	0	0	0	0	0	0	0	0	0	0	0
IGLV7-46	0	0	0	0	0	0	0	0	0	0	3	0	0	0	0	0
RBMX	0	0	0	0	0	0	0	0	1	0	0	0	0	0	0	0
ARHGAP44	0	0	0	0	2	0	0	0	0	0	0	0	0	0	0	0
GGH	0	0	0	0	0	1	0	1	0	0	0	0	0	0	0	0
IGHV2-70	3	0	0	0	0	0	0	0	0	0	0	0	0	0	0	0
MNS1	0	0	0	0	0	0	0	0	0	0	0	0	0	0	0	1
MLLT1	0	0	0	1	0	0	0	0	0	0	0	0	0	0	0	0
CLEC16A	0	0	0	0	0	0	1	0	0	0	0	0	0	0	0	0
HCN4	0	0	0	0	0	0	0	0	0	0	0	1	0	0	0	0
NAV2	0	0	0	0	0	1	0	0	0	0	0	0	0	0	0	0
DNMT1	0	0	0	0	0	0	0	0	1	0	0	0	0	0	0	0
SBNO2	0	0	0	0	0	0	0	0	0	0	0	1	0	0	0	0
RERE	0	0	0	0	0	0	0	0	1	0	0	0	0	0	0	0
FBN1	0	0	0	0	0	0	0	0	0	0	0	0	0	2	0	0
GSPT2	0	0	0	0	0	0	0	0	0	2	0	0	0	0	0	0
ARHGEF2	0	0	0	1	0	0	0	0	0	0	0	0	0	0	0	0
ALK	0	0	0	0	0	1	0	0	0	0	0	0	0	0	0	0
GPRIN1	0	0	0	0	0	0	0	0	0	0	0	2	0	0	0	0
LRBA	0	0	0	0	0	0	0	0	0	0	0	0	2	0	0	0
HSPA8	2	0	0	0	0	0	0	0	0	0	0	0	0	0	0	0
SRRM4	0	0	0	0	0	0	1	0	0	0	0	0	0	0	0	0
VSIG4	0	0	0	0	0	0	0	0	0	0	0	0	0	5	0	0
APP	0	0	0	0	0	2	0	0	0	0	0	0	0	0	0	0
SPTBN1	0	0	0	0	0	0	0	0	1	0	0	0	0	0	0	0
HLA-B	0	0	0	0	0	0	0	0	0	0	0	0	1	0	0	0
SPTB	0	0	0	0	0	0	0	0	0	0	0	0	0	2	0	0
SLC2A1	0	0	0	0	0	0	0	0	0	0	0	0	0	4	0	0
BOD1L1	0	0	0	0	1	0	0	0	0	0	0	0	0	0	0	0
VIL1	0	0	0	0	0	0	1	0	0	0	0	0	0	0	0	0
SOD3	0	0	0	0	0	0	0	0	0	0	0	3	0	0	0	0
KLHL11	0	0	0	0	0	1	0	0	0	0	0	0	0	0	0	0
VNN1	0	0	0	0	0	0	0	0	0	0	0	0	0	0	0	2
KRT17	0	0	0	0	2	0	0	0	0	0	0	0	0	0	0	0
CTSD	0	0	0	0	0	0	0	0	0	0	0	0	3	0	0	0
MYBPC3	0	0	0	0	0	1	0	0	0	0	0	0	0	0	0	0
ATAD5	0	0	0	0	0	0	0	0	0	0	0	0	0	0	1	0
MTOR	0	0	0	0	0	0	1	0	0	0	0	0	0	0	0	0
ITGA1	0	0	0	0	0	0	0	0	0	0	0	0	0	0	1	0
ARHGEF10	0	0	0	0	0	0	0	0	0	0	0	1	0	0	0	0
FBLN5	0	0	0	0	0	0	0	0	2	0	0	0	0	0	0	0
CCDC71	0	0	0	0	0	1	0	0	0	0	0	0	0	0	0	0
KRTAP2-1	0	0	0	0	0	0	0	0	0	0	0	0	0	0	0	1
RBFOX1	0	0	0	0	0	0	0	0	0	0	1	0	0	0	0	0
TTK	0	0	0	0	0	0	1	0	0	0	0	0	0	0	0	0
YY1AP1	0	0	1	0	0	0	0	0	0	0	0	0	0	0	0	0
STX10	0	0	0	0	0	0	0	0	0	0	0	0	0	0	1	0
PIAS3	0	0	0	0	0	0	0	1	0	0	0	0	0	0	0	0
MUCL3	1	0	0	0	0	0	0	0	0	0	0	0	0	0	0	0
PFN1	0	0	0	0	0	0	0	0	0	0	0	0	2	0	0	0
MYOM3	0	0	0	0	0	0	0	0	1	0	0	0	0	0	0	0
TLL1	0	0	0	0	0	0	0	0	0	0	0	0	0	1	0	0
LAMB4	0	0	0	0	0	0	0	0	1	0	0	0	0	0	0	0
RNF150	0	0	0	0	0	0	0	0	1	0	0	0	0	0	0	0
ADGRA2	1	0	0	0	0	0	0	0	0	0	0	0	0	0	0	0
MAN2A1	0	0	2	0	0	0	0	0	0	0	0	0	0	0	0	0
EGFL7	0	0	0	0	0	0	0	0	0	0	0	0	1	0	0	0
MMP3	0	0	0	0	0	0	0	0	0	0	0	0	0	1	0	0
CST6	0	0	0	0	0	0	0	0	0	0	0	0	0	3	0	0
GSTO1	1	0	0	0	0	0	0	0	0	0	0	0	0	0	0	0
NOS2	0	0	0	0	0	0	1	0	0	0	0	0	0	0	0	0
EFL1	0	0	0	0	0	0	0	1	0	0	0	0	0	0	0	0
PRAM1	0	0	1	0	0	0	0	0	0	0	0	0	0	0	0	0
CAVIN2	0	0	0	0	0	0	0	0	0	0	0	2	0	0	0	0
PRG2	0	0	0	1	0	0	0	0	0	0	0	0	0	0	0	0
IGFBP6	0	0	0	0	0	0	0	0	0	0	0	0	0	1	0	0
SEC31B	0	1	0	0	0	0	0	0	0	0	0	0	0	0	0	0
ANKLE2	0	0	0	0	1	0	0	0	0	0	0	0	0	0	0	0
OLIG2	0	0	0	0	0	0	0	0	0	0	0	1	0	0	0	0
FAM189B	0	0	0	0	0	0	0	0	0	0	0	0	1	0	0	0
MAP3K6	0	0	0	0	0	0	0	0	0	0	0	0	0	0	0	1
