# Supplementary material for: Phenotype and Neuronal Cytotoxic Function of Glioblastoma Extracellular Vesicles
Source: Biomedicines. 2022 Oct 27;10(11):2718. doi: 10.3390/biomedicines10112718 (PMC9688005; doi:10.3390/biomedicines10112718)
Supplement: Supplementary file 1 [file biomedicines-10-02718-s001.zip › biomedicines-1930407 Table S4 MS proteomic results purified IgG.xls.xlsx]

## Sheet: Samples Report for IgG enriched
IgG enriched plasma human database 20210628, Samples report created on 09/28/2022
Experiment: IgG enriched plasma human database 20210628
Protein Grouping Strategy: Experiment-wide grouping with binary peptide-protein weights
Peptide Thresholds: 95.0% minimum
Protein Thresholds: 99.9% minimum and 2 peptides minimum
Peptide FDR: 0.4% (Prophet)
Protein FDR: 0.0% (Prophet)
GO Annotation Source(s):
Pathway Annotation Source(s):
Alternate ID Source(s): FASTA:UniProt/Swiss-Prot (UniProtKB)
	Table S4: Proteomic results of IgG samples
IgG enriched plasma human database 20210628						GBM	GBM	GBM	GBM	HC	HC	HC	HC	Met	Met	Met	Met	MMA	MMA	MMA	MMA
#	Identified Proteins (451)	Accession Number	Alternate ID	Molecular Weight	Taxonomy	GBM L14_7	GBM L14_6	GBM L14_5	GBM L14_2	M-29_HC	HC_039	HC_036	HC_035	Met_4	Met_3	Met_2	Met_1	MMA L8_4	MMA L7_7	MMA L7_1	MMA L10_1
1	Immunoglobulin gamma-1 heavy chain OS=Homo sapiens OX=9606 PE=1 SV=2	IGG1_HUMAN		49 kDa	Homo sapiens	4270	5832	4417	4806	5930	5879	5299	4611	4631	4974	1462	4897	5317	4543	5424	4678
2	Serotransferrin OS=Homo sapiens OX=9606 GN=TF PE=1 SV=3	TRFE_HUMAN	TF	77 kDa	Homo sapiens	1441	1677	1598	1242	1865	2400	1786	1970	845	1491	341	947	2602	3571	3421	3809
3	Immunoglobulin heavy constant gamma 2 OS=Homo sapiens OX=9606 GN=IGHG2 PE=1 SV=2	IGHG2_HUMAN	IGHG2	36 kDa	Homo sapiens	2879	2674	2084	2476	2819	2692	2408	2465	2061	2083	688	2208	2409	2294	2526	1982
4	Immunoglobulin kappa light chain OS=Homo sapiens OX=9606 PE=1 SV=1	IGK_HUMAN		23 kDa	Homo sapiens	2011	2205	1637	1778	2440	2111	1900	1719	2125	2108	540	1928	2253	2052	1906	1886
5	Serum albumin OS=Homo sapiens OX=9606 GN=ALB PE=1 SV=2	ALBU_HUMAN	ALB	69 kDa	Homo sapiens	195	217	153	208	421	353	290	322	143	290	178	371	719	2511	2527	3513
6	Keratin, type II cytoskeletal 1 OS=Homo sapiens OX=9606 GN=KRT1 PE=1 SV=6	K2C1_HUMAN	KRT1	66 kDa	Homo sapiens	957	418	1066	1098	415	315	623	405	596	546	1741	353	269	430	316	287
7	Immunoglobulin heavy constant gamma 3 OS=Homo sapiens OX=9606 GN=IGHG3 PE=1 SV=2	IGHG3_HUMAN	IGHG3	41 kDa	Homo sapiens	1627	2477	1324	1655	1672	1666	1999	1638	1713	1817	532	2638	2129	1675	2136	1342
8	Keratin, type I cytoskeletal 9 OS=Homo sapiens OX=9606 GN=KRT9 PE=1 SV=3	K1C9_HUMAN	KRT9	62 kDa	Homo sapiens	732	269	852	815	285	224	504	331	518	421	1266	263	187	325	163	224
9	Apolipoprotein B-100 OS=Homo sapiens OX=9606 GN=APOB PE=1 SV=2	APOB_HUMAN	APOB	516 kDa	Homo sapiens	0	33	0	0	0	14	0	0	0	36	18	3	424	939	2571	2791
10	Immunoglobulin lambda-1 light chain OS=Homo sapiens OX=9606 PE=1 SV=1	IGL1_HUMAN		23 kDa	Homo sapiens	368	340	377	375	426	359	291	331	297	337	53	407	346	313	486	347
11	Immunoglobulin heavy constant gamma 4 OS=Homo sapiens OX=9606 GN=IGHG4 PE=1 SV=1	IGHG4_HUMAN	IGHG4	36 kDa	Homo sapiens	1529	1640	1075	1355	1470	1561	1645	1650	1314	1640	642	1432	1630	1612	2375	1389
12	Hemopexin OS=Homo sapiens OX=9606 GN=HPX PE=1 SV=2	HEMO_HUMAN	HPX	52 kDa	Homo sapiens	195	162	130	134	165	574	348	447	85	209	24	106	298	554	636	715
13	Beta-2-glycoprotein 1 OS=Homo sapiens OX=9606 GN=APOH PE=1 SV=3	APOH_HUMAN	APOH	38 kDa	Homo sapiens	273	235	270	173	253	349	252	263	239	318	27	247	295	369	384	308
14	Keratin, type II cytoskeletal 2 epidermal OS=Homo sapiens OX=9606 GN=KRT2 PE=1 SV=2	K22E_HUMAN	KRT2	65 kDa	Homo sapiens	408	162	462	519	193	139	221	188	219	208	1104	119	94	253	99	83
15	Keratin, type I cytoskeletal 10 OS=Homo sapiens OX=9606 GN=KRT10 PE=1 SV=6	K1C10_HUMAN	KRT10	59 kDa	Homo sapiens	332	147	413	403	189	109	218	189	239	245	931	172	87	221	110	116
16	Immunoglobulin kappa constant OS=Homo sapiens OX=9606 GN=IGKC PE=1 SV=2	IGKC_HUMAN	IGKC	12 kDa	Homo sapiens	2156	2316	1749	1906	2567	2216	2025	1821	2196	2200	576	2014	2318	2093	2021	1963
17	Fibrinogen beta chain OS=Homo sapiens OX=9606 GN=FGB PE=1 SV=2	FIBB_HUMAN	FGB	56 kDa	Homo sapiens	3	17	12	0	7	0	204	0	0	48	6	20	183	350	687	1066
18	Immunoglobulin kappa variable 3-20 OS=Homo sapiens OX=9606 GN=IGKV3-20 PE=1 SV=2	KV320_HUMAN	IGKV3-20	13 kDa	Homo sapiens	174	190	154	198	215	184	201	203	183	152	17	171	213	215	239	164
19	Immunoglobulin kappa variable 4-1 OS=Homo sapiens OX=9606 GN=IGKV4-1 PE=1 SV=1	KV401_HUMAN	IGKV4-1	13 kDa	Homo sapiens	167	118	88	148	184	148	123	152	165	85	21	157	95	79	212	106
20	Immunoglobulin heavy variable 4-38-2 OS=Homo sapiens OX=9606 GN=IGHV4-38-2 PE=3 SV=1	HVD82_HUMAN	IGHV4-38-2	13 kDa	Homo sapiens	104	97	98	127	110	126	103	108	116	90	30	202	124	119	149	99
21	Fibrinogen gamma chain OS=Homo sapiens OX=9606 GN=FGG PE=1 SV=3	FIBG_HUMAN	FGG	52 kDa	Homo sapiens	6	26	15	0	11	0	180	0	0	38	0	22	149	283	458	738
22	Keratin, type I cytoskeletal 14 OS=Homo sapiens OX=9606 GN=KRT14 PE=1 SV=4	K1C14_HUMAN	KRT14	52 kDa	Homo sapiens	168	64	185	221	61	38	108	122	139	72	409	72	37	80	45	47
23	Fibrinogen alpha chain OS=Homo sapiens OX=9606 GN=FGA PE=1 SV=2	FIBA_HUMAN	FGA	95 kDa	Homo sapiens	18	16	33	0	7	17	130	11	8	34	0	31	115	172	376	561
24	Plasma kallikrein OS=Homo sapiens OX=9606 GN=KLKB1 PE=1 SV=1	KLKB1_HUMAN	KLKB1	71 kDa	Homo sapiens	132	60	150	98	89	110	106	81	116	120	13	99	154	141	158	142
25	Immunoglobulin kappa variable 1D-12 OS=Homo sapiens OX=9606 GN=IGKV1D-12 PE=1 SV=2	KVD12_HUMAN	IGKV1D-12	13 kDa	Homo sapiens	77	110	117	160	154	103	97	95	130	88	0	150	92	113	200	71
26	Immunoglobulin heavy variable 3-30-3 OS=Homo sapiens OX=9606 GN=IGHV3-30-3 PE=3 SV=1	HVC33_HUMAN	IGHV3-30-3	13 kDa	Homo sapiens	85	58	81	106	119	185	45	74	83	35	45	171	81	76	179	40
27	Immunoglobulin lambda constant 2 OS=Homo sapiens OX=9606 GN=IGLC2 PE=1 SV=1	IGLC2_HUMAN	IGLC2	11 kDa	Homo sapiens	407	365	419	396	476	391	320	334	337	418	60	445	376	317	530	380
28	Plasminogen OS=Homo sapiens OX=9606 GN=PLG PE=1 SV=2	PLMN_HUMAN	PLG	91 kDa	Homo sapiens	0	23	18	0	20	36	26	14	0	40	0	8	101	275	399	421
29	Complement factor B OS=Homo sapiens OX=9606 GN=CFB PE=1 SV=2	CFAB_HUMAN	CFB	86 kDa	Homo sapiens	14	28	10	3	25	94	35	103	31	59	10	38	53	191	271	397
30	Immunoglobulin heavy constant alpha 1 OS=Homo sapiens OX=9606 GN=IGHA1 PE=1 SV=2	IGHA1_HUMAN	IGHA1	38 kDa	Homo sapiens	43	127	35	9	44	36	23	28	10	61	14	44	182	239	169	260
31	Immunoglobulin heavy variable 5-51 OS=Homo sapiens OX=9606 GN=IGHV5-51 PE=3 SV=1	HV551_HUMAN	IGHV5-51	13 kDa	Homo sapiens	60	56	65	134	88	41	50	48	58	56	26	75	94	75	239	57
32	Immunoglobulin heavy variable 3-7 OS=Homo sapiens OX=9606 GN=IGHV3-7 PE=1 SV=2	HV307_HUMAN	IGHV3-7	13 kDa	Homo sapiens	97	77	90	91	136	101	37	80	63	48	24	133	61	36	103	28
33	Coagulation factor XI OS=Homo sapiens OX=9606 GN=F11 PE=1 SV=1	FA11_HUMAN	F11	70 kDa	Homo sapiens	97	52	109	112	64	98	60	77	108	94	0	82	79	77	52	48
34	Immunoglobulin lambda variable 3-9 OS=Homo sapiens OX=9606 GN=IGLV3-9 PE=3 SV=1	LV39_HUMAN	IGLV3-9	12 kDa	Homo sapiens	72	102	63	59	116	87	0	82	71	86	0	103	52	88	70	42
35	Immunoglobulin kappa variable 1-27 OS=Homo sapiens OX=9606 GN=IGKV1-27 PE=3 SV=1	KV127_HUMAN	IGKV1-27	13 kDa	Homo sapiens	53	64	112	99	72	62	68	52	122	45	26	89	72	77	79	49
36	Keratin, type II cytoskeletal 5 OS=Homo sapiens OX=9606 GN=KRT5 PE=1 SV=3	K2C5_HUMAN	KRT5	62 kDa	Homo sapiens	132	46	180	180	55	38	80	73	123	66	452	44	31	84	32	40
37	Immunoglobulin alpha-2 heavy chain OS=Homo sapiens OX=9606 PE=1 SV=2	IGA2_HUMAN		49 kDa	Homo sapiens	42	65	57	50	65	42	25	31	24	34	27	71	87	98	89	100
38	Immunoglobulin heavy variable 3-9 OS=Homo sapiens OX=9606 GN=IGHV3-9 PE=1 SV=2	HV309_HUMAN	IGHV3-9	13 kDa	Homo sapiens	107	103	81	66	112	127	46	71	84	53	24	149	93	49	111	39
39	Complement factor I OS=Homo sapiens OX=9606 GN=CFI PE=1 SV=2	CFAI_HUMAN	CFI	66 kDa	Homo sapiens	28	54	30	11	57	59	60	41	27	79	0	30	88	131	151	173
40	Desmoplakin OS=Homo sapiens OX=9606 GN=DSP PE=1 SV=3	DESP_HUMAN	DSP	332 kDa	Homo sapiens	81	11	95	119	18	8	25	23	38	18	286	7	5	35	5	4
41	Junction plakoglobin OS=Homo sapiens OX=9606 GN=JUP PE=1 SV=3	PLAK_HUMAN	JUP	82 kDa	Homo sapiens	34	10	44	41	15	7	23	9	14	14	149	4	5	16	5	6
42	Immunoglobulin heavy variable 3-72 OS=Homo sapiens OX=9606 GN=IGHV3-72 PE=3 SV=1	HV372_HUMAN	IGHV3-72	13 kDa	Homo sapiens	56	44	47	53	54	60	54	72	78	27	9	106	32	23	20	43
43	Immunoglobulin heavy variable 3-23 OS=Homo sapiens OX=9606 GN=IGHV3-23 PE=1 SV=2	HV323_HUMAN	IGHV3-23	13 kDa	Homo sapiens	0	0	68	0	125	138	64	92	113	71	67	195	116	85	181	65
44	Immunoglobulin lambda variable 1-47 OS=Homo sapiens OX=9606 GN=IGLV1-47 PE=1 SV=2	LV147_HUMAN	IGLV1-47	12 kDa	Homo sapiens	23	37	31	32	120	22	0	20	25	29	13	81	108	17	42	35
45	Immunoglobulin kappa variable 3D-15 OS=Homo sapiens OX=9606 GN=IGKV3D-15 PE=3 SV=6	KVD15_HUMAN	IGKV3D-15	13 kDa	Homo sapiens	40	49	27	36	44	31	47	39	26	22	0	36	47	39	0	28
46	Immunoglobulin heavy variable 6-1 OS=Homo sapiens OX=9606 GN=IGHV6-1 PE=3 SV=1	HV601_HUMAN	IGHV6-1	13 kDa	Homo sapiens	3	9	9	8	7	16	2	24	15	4	6	23	7	11	0	11
47	Immunoglobulin heavy variable 3-49 OS=Homo sapiens OX=9606 GN=IGHV3-49 PE=3 SV=1	HV349_HUMAN	IGHV3-49	13 kDa	Homo sapiens	29	26	32	26	37	20	35	21	24	21	8	73	26	34	92	28
48	Keratin, type I cytoskeletal 16 OS=Homo sapiens OX=9606 GN=KRT16 PE=1 SV=4	K1C16_HUMAN	KRT16	51 kDa	Homo sapiens	146	32	129	154	39	24	74	89	79	43	312	59	34	36	30	36
49	Immunoglobulin heavy variable 3-30 OS=Homo sapiens OX=9606 GN=IGHV3-30 PE=1 SV=2	HV330_HUMAN (+1)	IGHV3-30	13 kDa	Homo sapiens	79	41	64	107	98	165	50	81	89	33	51	219	95	95	273	43
50	Immunoglobulin kappa variable 1-5 OS=Homo sapiens OX=9606 GN=IGKV1-5 PE=1 SV=2	KV105_HUMAN	IGKV1-5	13 kDa	Homo sapiens	35	45	31	44	43	75	0	40	55	0	0	61	76	58	60	34
51	Complement component C8 beta chain OS=Homo sapiens OX=9606 GN=C8B PE=1 SV=3	CO8B_HUMAN	C8B	67 kDa	Homo sapiens	2	13	0	0	7	59	95	31	0	20	0	4	54	62	133	161
52	Immunoglobulin heavy variable 4-39 OS=Homo sapiens OX=9606 GN=IGHV4-39 PE=1 SV=2	HV439_HUMAN	IGHV4-39	14 kDa	Homo sapiens	0	0	0	0	0	0	0	108	119	0	0	0	0	0	0	0
53	Hornerin OS=Homo sapiens OX=9606 GN=HRNR PE=1 SV=2	HORN_HUMAN	HRNR	282 kDa	Homo sapiens	61	36	90	71	14	8	31	20	27	15	117	13	14	9	4	14
54	Immunoglobulin delta heavy chain OS=Homo sapiens OX=9606 PE=1 SV=1	IGD_HUMAN		56 kDa	Homo sapiens	11	26	9	18	62	52	60	26	34	46	0	19	14	37	42	79
55	Hepatocyte growth factor-like protein OS=Homo sapiens OX=9606 GN=MST1 PE=1 SV=2	HGFL_HUMAN	MST1	80 kDa	Homo sapiens	30	26	29	8	36	42	42	36	33	55	0	55	47	53	41	41
56	Properdin OS=Homo sapiens OX=9606 GN=CFP PE=1 SV=2	PROP_HUMAN	CFP	51 kDa	Homo sapiens	53	38	47	58	43	49	43	48	43	50	0	33	28	20	24	20
57	Immunoglobulin heavy variable 1-69 OS=Homo sapiens OX=9606 GN=IGHV1-69 PE=1 SV=2	HV169_HUMAN	IGHV1-69	13 kDa	Homo sapiens	22	26	25	33	16	10	17	20	26	19	12	51	12	22	164	8
58	Alpha-2-macroglobulin OS=Homo sapiens OX=9606 GN=A2M PE=1 SV=3	A2MG_HUMAN	A2M	163 kDa	Homo sapiens	0	0	0	0	0	0	0	0	0	20	4	17	23	345	36	136
59	Complement component C8 alpha chain OS=Homo sapiens OX=9606 GN=C8A PE=1 SV=2	CO8A_HUMAN	C8A	65 kDa	Homo sapiens	0	16	0	0	13	36	84	37	0	24	0	0	54	61	120	137
60	Immunoglobulin heavy variable 3-48 OS=Homo sapiens OX=9606 GN=IGHV3-48 PE=1 SV=2	HV348_HUMAN	IGHV3-48	13 kDa	Homo sapiens	0	0	68	0	121	0	0	0	49	0	110	310	0	0	0	23
61	Immunoglobulin kappa variable 3-11 OS=Homo sapiens OX=9606 GN=IGKV3-11 PE=1 SV=1	KV311_HUMAN	IGKV3-11	13 kDa	Homo sapiens	26	16	44	55	38	23	13	23	15	16	9	34	27	24	39	13
62	Immunoglobulin kappa variable 2-40 OS=Homo sapiens OX=9606 GN=IGKV2-40 PE=3 SV=2	KV240_HUMAN (+1)	IGKV2-40	13 kDa	Homo sapiens	41	28	35	45	13	22	16	29	29	23	11	35	12	26	32	24
63	Immunoglobulin heavy constant mu OS=Homo sapiens OX=9606 GN=IGHM PE=1 SV=4	IGHM_HUMAN	IGHM	49 kDa	Homo sapiens	2	7	5	0	0	5	2	0	3	26	0	14	34	77	91	202
64	Immunoglobulin heavy variable 3-21 OS=Homo sapiens OX=9606 GN=IGHV3-21 PE=1 SV=1	HV321_HUMAN	IGHV3-21	13 kDa	Homo sapiens	81	49	79	81	109	0	0	58	60	70	37	141	77	44	105	0
65	Immunoglobulin heavy variable 2-26 OS=Homo sapiens OX=9606 GN=IGHV2-26 PE=3 SV=1	HV226_HUMAN	IGHV2-26	13 kDa	Homo sapiens	14	20	25	29	18	15	0	0	28	20	11	39	19	24	51	0
66	Glyceraldehyde-3-phosphate dehydrogenase OS=Homo sapiens OX=9606 GN=GAPDH PE=1 SV=3	G3P_HUMAN	GAPDH	36 kDa	Homo sapiens	18	4	30	26	8	0	6	3	5	7	294	7	0	0	7	10
67	Immunoglobulin heavy variable 1-2 OS=Homo sapiens OX=9606 GN=IGHV1-2 PE=1 SV=2	HV102_HUMAN	IGHV1-2	13 kDa	Homo sapiens	39	19	46	17	8	19	18	16	29	25	7	80	8	20	30	13
68	Titin OS=Homo sapiens OX=9606 GN=TTN PE=1 SV=4	TITIN_HUMAN	TTN	3816 kDa	Homo sapiens	3	0	0	0	0	0	0	0	0	0	0	0	0	0	0	0
69	Immunoglobulin heavy variable 3-43 OS=Homo sapiens OX=9606 GN=IGHV3-43 PE=3 SV=1	HV343_HUMAN	IGHV3-43	13 kDa	Homo sapiens	80	55	44	87	99	107	0	56	55	39	0	0	58	58	134	29
70	Apolipoprotein A-I OS=Homo sapiens OX=9606 GN=APOA1 PE=1 SV=1	APOA1_HUMAN	APOA1	31 kDa	Homo sapiens	0	2	0	0	7	9	0	6	0	15	0	11	23	150	127	154
71	Keratin, type II cytoskeletal 6A OS=Homo sapiens OX=9606 GN=KRT6A PE=1 SV=3	K2C6A_HUMAN	KRT6A	60 kDa	Homo sapiens	128	0	133	153	59	36	66	86	72	64	344	49	30	72	32	49
72	Immunoglobulin kappa variable 1-17 OS=Homo sapiens OX=9606 GN=IGKV1-17 PE=1 SV=2	KV117_HUMAN	IGKV1-17	13 kDa	Homo sapiens	16	12	27	14	13	17	26	13	24	23	0	29	16	12	17	7
73	Coagulation factor XII OS=Homo sapiens OX=9606 GN=F12 PE=1 SV=3	FA12_HUMAN	F12	68 kDa	Homo sapiens	7	10	10	0	7	22	8	18	6	19	0	6	58	77	83	104
74	Keratinocyte proline-rich protein OS=Homo sapiens OX=9606 GN=KPRP PE=1 SV=1	KPRP_HUMAN	KPRP	64 kDa	Homo sapiens	23	14	51	43	18	3	16	7	19	14	113	10	0	16	0	5
75	Immunoglobulin heavy variable 3-64D OS=Homo sapiens OX=9606 GN=IGHV3-64D PE=3 SV=1	HV64D_HUMAN	IGHV3-64D	13 kDa	Homo sapiens	35	13	16	20	23	27	8	22	17	5	0	27	18	24	25	15
76	Immunoglobulin heavy variable 3-15 OS=Homo sapiens OX=9606 GN=IGHV3-15 PE=3 SV=1	HV315_HUMAN	IGHV3-15	13 kDa	Homo sapiens	30	15	35	22	33	26	20	24	33	13	0	47	23	31	29	17
77	Carbonic anhydrase 1 OS=Homo sapiens OX=9606 GN=CA1 PE=1 SV=2	CAH1_HUMAN	CA1	29 kDa	Homo sapiens	19	16	33	44	12	0	35	6	43	40	56	34	12	32	21	28
78	Plasma serine protease inhibitor OS=Homo sapiens OX=9606 GN=SERPINA5 PE=1 SV=3	IPSP_HUMAN	SERPINA5	46 kDa	Homo sapiens	31	26	33	23	26	19	31	20	24	22	3	36	38	33	46	53
79	Immunoglobulin lambda variable 1-51 OS=Homo sapiens OX=9606 GN=IGLV1-51 PE=1 SV=2	LV151_HUMAN	IGLV1-51	12 kDa	Homo sapiens	18	23	20	23	27	14	19	22	21	22	0	30	22	27	31	18
80	Immunoglobulin kappa variable 1D-8 OS=Homo sapiens OX=9606 GN=IGKV1D-8 PE=3 SV=6	KVD08_HUMAN	IGKV1D-8	13 kDa	Homo sapiens	0	26	0	29	17	14	0	0	23	0	0	22	23	52	18	19
81	Desmoglein-1 OS=Homo sapiens OX=9606 GN=DSG1 PE=1 SV=2	DSG1_HUMAN	DSG1	114 kDa	Homo sapiens	21	0	54	54	11	3	11	4	12	8	159	0	0	21	0	0
82	Histidine-rich glycoprotein OS=Homo sapiens OX=9606 GN=HRG PE=1 SV=1	HRG_HUMAN	HRG	60 kDa	Homo sapiens	0	0	0	0	5	9	4	0	0	0	0	0	28	112	129	135
83	Immunoglobulin kappa variable 1-8 OS=Homo sapiens OX=9606 GN=IGKV1-8 PE=3 SV=1	KV108_HUMAN	IGKV1-8	13 kDa	Homo sapiens	55	71	118	95	74	63	62	52	116	54	0	77	74	72	80	53
84	Haptoglobin OS=Homo sapiens OX=9606 GN=HP PE=1 SV=1	HPT_HUMAN	HP	45 kDa	Homo sapiens	0	0	0	0	0	0	0	0	5	50	0	33	29	190	25	50
85	Immunoglobulin heavy variable 3-74 OS=Homo sapiens OX=9606 GN=IGHV3-74 PE=3 SV=1	HV374_HUMAN	IGHV3-74	13 kDa	Homo sapiens	56	43	51	81	103	83	35	50	50	20	0	113	48	44	60	45
86	Immunoglobulin heavy variable 3-11 OS=Homo sapiens OX=9606 GN=IGHV3-11 PE=1 SV=2	HV311_HUMAN	IGHV3-11	13 kDa	Homo sapiens	0	0	63	72	0	0	0	69	0	0	36	168	0	46	80	0
87	Immunoglobulin heavy variable 3-53 OS=Homo sapiens OX=9606 GN=IGHV3-53 PE=1 SV=2	HV353_HUMAN	IGHV3-53	13 kDa	Homo sapiens	0	0	63	109	114	0	0	0	89	0	39	133	57	0	72	0
88	Filaggrin-2 OS=Homo sapiens OX=9606 GN=FLG2 PE=1 SV=1	FILA2_HUMAN	FLG2	248 kDa	Homo sapiens	40	5	46	41	14	5	14	5	18	20	70	5	7	21	3	4
89	Immunoglobulin kappa variable 1-33 OS=Homo sapiens OX=9606 GN=IGKV1-33 PE=1 SV=2	KV133_HUMAN (+1)	IGKV1-33	13 kDa	Homo sapiens	26	15	27	26	25	18	11	17	32	18	0	54	17	27	27	14
90	Immunoglobulin heavy variable 1-46 OS=Homo sapiens OX=9606 GN=IGHV1-46 PE=1 SV=2	HV146_HUMAN	IGHV1-46	13 kDa	Homo sapiens	24	11	28	48	12	14	17	33	35	14	26	73	44	12	25	5
91	Immunoglobulin heavy variable 1-18 OS=Homo sapiens OX=9606 GN=IGHV1-18 PE=3 SV=1	HV118_HUMAN	IGHV1-18	13 kDa	Homo sapiens	23	12	34	24	18	13	10	22	24	17	23	50	27	27	35	14
92	Fructose-bisphosphate aldolase A OS=Homo sapiens OX=9606 GN=ALDOA PE=1 SV=2	ALDOA_HUMAN	ALDOA	39 kDa	Homo sapiens	23	7	20	39	11	0	0	0	4	12	61	62	9	0	14	22
93	Complement C2 OS=Homo sapiens OX=9606 GN=C2 PE=1 SV=2	CO2_HUMAN	C2	83 kDa	Homo sapiens	14	12	0	4	13	16	9	17	0	15	0	10	26	61	57	41
94	Immunoglobulin heavy variable 3-13 OS=Homo sapiens OX=9606 GN=IGHV3-13 PE=1 SV=2	HV313_HUMAN	IGHV3-13	13 kDa	Homo sapiens	62	36	47	45	76	58	30	40	42	29	0	82	44	33	65	23
95	Immunoglobulin heavy variable 4-28 OS=Homo sapiens OX=9606 GN=IGHV4-28 PE=3 SV=1	HV428_HUMAN	IGHV4-28	13 kDa	Homo sapiens	14	11	9	10	7	16	15	11	17	4	0	30	5	15	20	13
96	Immunoglobulin heavy variable 3-73 OS=Homo sapiens OX=9606 GN=IGHV3-73 PE=3 SV=1	HV373_HUMAN	IGHV3-73	13 kDa	Homo sapiens	16	3	39	19	5	11	4	12	23	8	0	43	10	12	20	3
97	Immunoglobulin kappa variable 1-16 OS=Homo sapiens OX=9606 GN=IGKV1-16 PE=1 SV=2	KV116_HUMAN	IGKV1-16	13 kDa	Homo sapiens	22	0	17	31	19	25	0	19	20	0	0	41	18	22	26	0
98	Immunoglobulin epsilon heavy chain OS=Homo sapiens OX=9606 PE=1 SV=1	IGE_HUMAN		60 kDa	Homo sapiens	0	4	12	0	0	0	0	0	0	15	0	0	0	0	0	0
99	Catalase OS=Homo sapiens OX=9606 GN=CAT PE=1 SV=3	CATA_HUMAN	CAT	60 kDa	Homo sapiens	6	19	11	20	28	0	8	3	2	12	65	19	25	33	13	20
100	Immunoglobulin kappa variable 1-39 OS=Homo sapiens OX=9606 GN=IGKV1-39 PE=1 SV=2	KV139_HUMAN (+1)	IGKV1-39	13 kDa	Homo sapiens	59	97	0	152	152	91	87	90	118	75	0	149	82	105	197	62
101	Protein S100-A9 OS=Homo sapiens OX=9606 GN=S100A9 PE=1 SV=1	S10A9_HUMAN	S100A9	13 kDa	Homo sapiens	23	10	13	10	3	23	8	10	10	45	69	28	6	0	0	0
102	Keratin, type I cytoskeletal 17 OS=Homo sapiens OX=9606 GN=KRT17 PE=1 SV=2	K1C17_HUMAN	KRT17	48 kDa	Homo sapiens	64	17	55	75	0	0	19	55	42	24	168	22	10	13	0	14
103	Immunoglobulin kappa variable 2-28 OS=Homo sapiens OX=9606 GN=IGKV2-28 PE=3 SV=1	KV228_HUMAN (+1)	IGKV2-28	13 kDa	Homo sapiens	0	0	0	0	0	44	0	0	0	0	0	0	0	0	0	0
104	Complement C3 OS=Homo sapiens OX=9606 GN=C3 PE=1 SV=2	CO3_HUMAN	C3	187 kDa	Homo sapiens	0	0	0	0	0	6	3	12	0	6	0	0	4	183	11	33
105	Complement component C8 gamma chain OS=Homo sapiens OX=9606 GN=C8G PE=1 SV=3	CO8G_HUMAN	C8G	22 kDa	Homo sapiens	0	12	0	0	5	28	33	14	0	7	0	9	25	25	46	75
106	Alpha-1-antitrypsin OS=Homo sapiens OX=9606 GN=SERPINA1 PE=1 SV=3	A1AT_HUMAN	SERPINA1	47 kDa	Homo sapiens	0	0	0	0	0	6	3	0	0	9	0	11	20	181	13	40
107	Complement C4-B OS=Homo sapiens OX=9606 GN=C4B PE=1 SV=2	CO4B_HUMAN	C4B	193 kDa	Homo sapiens	0	0	0	0	0	40	30	28	0	6	0	0	11	104	30	48
108	Immunoglobulin kappa variable 6D-21 OS=Homo sapiens OX=9606 GN=IGKV6D-21 PE=3 SV=1	KVD21_HUMAN	IGKV6D-21	12 kDa	Homo sapiens	19	17	17	26	25	17	20	24	19	14	0	13	15	10	15	8
109	Keratin, type II cytoskeletal 4 OS=Homo sapiens OX=9606 GN=KRT4 PE=1 SV=4	K2C4_HUMAN	KRT4	57 kDa	Homo sapiens	160	0	69	147	0	0	0	0	0	64	203	0	0	0	0	0
110	Immunoglobulin lambda variable 4-69 OS=Homo sapiens OX=9606 GN=IGLV4-69 PE=1 SV=1	LV469_HUMAN	IGLV4-69	13 kDa	Homo sapiens	7	7	12	11	13	10	6	7	9	6	6	27	13	22	74	17
111	Immunoglobulin kappa variable 2-30 OS=Homo sapiens OX=9606 GN=IGKV2-30 PE=3 SV=2	KV230_HUMAN	IGKV2-30	13 kDa	Homo sapiens	41	31	37	47	19	47	18	30	42	26	0	56	19	28	37	29
112	Desmocollin-1 OS=Homo sapiens OX=9606 GN=DSC1 PE=1 SV=2	DSC1_HUMAN	DSC1	100 kDa	Homo sapiens	9	2	31	30	6	0	9	7	6	5	74	2	0	6	0	0
113	Immunoglobulin kappa variable 2-24 OS=Homo sapiens OX=9606 GN=IGKV2-24 PE=3 SV=1	KV224_HUMAN	IGKV2-24	13 kDa	Homo sapiens	18	6	12	21	5	11	7	10	15	8	0	18	7	0	6	7
114	Keratin, type II cuticular Hb6 OS=Homo sapiens OX=9606 GN=KRT86 PE=1 SV=1	KRT86_HUMAN	KRT86	53 kDa	Homo sapiens	27	0	76	4	11	0	9	0	0	3	23	0	6	47	0	0
115	Immunoglobulin heavy variable 2-5 OS=Homo sapiens OX=9606 GN=IGHV2-5 PE=1 SV=2	HV205_HUMAN	IGHV2-5	13 kDa	Homo sapiens	13	20	15	28	17	13	2	17	11	14	0	5	39	11	13	6
116	Alpha-enolase OS=Homo sapiens OX=9606 GN=ENO1 PE=1 SV=2	ENOA_HUMAN	ENO1	47 kDa	Homo sapiens	0	0	7	2	0	0	0	0	0	0	149	2	0	2	15	13
117	Immunoglobulin heavy variable 2-70D OS=Homo sapiens OX=9606 GN=IGHV2-70D PE=3 SV=1	HV70D_HUMAN	IGHV2-70D	13 kDa	Homo sapiens	18	0	34	34	6	10	0	24	27	18	9	30	0	6	11	0
118	Immunoglobulin lambda variable 3-25 OS=Homo sapiens OX=9606 GN=IGLV3-25 PE=1 SV=2	LV325_HUMAN	IGLV3-25	12 kDa	Homo sapiens	27	0	14	24	21	11	6	16	17	10	0	38	14	18	41	15
119	Profilin-1 OS=Homo sapiens OX=9606 GN=PFN1 PE=1 SV=2	PROF1_HUMAN	PFN1	15 kDa	Homo sapiens	10	7	27	0	14	2	0	0	0	12	49	35	23	5	20	24
120	Immunoglobulin lambda variable 3-10 OS=Homo sapiens OX=9606 GN=IGLV3-10 PE=3 SV=2	LV310_HUMAN	IGLV3-10	12 kDa	Homo sapiens	18	7	21	9	4	10	4	9	11	10	0	23	0	8	4	2
121	Peptidyl-prolyl cis-trans isomerase A OS=Homo sapiens OX=9606 GN=PPIA PE=1 SV=2	PPIA_HUMAN	PPIA	18 kDa	Homo sapiens	9	4	15	19	7	0	0	0	0	17	56	25	12	2	19	11
122	Keratin, type II cytoskeletal 78 OS=Homo sapiens OX=9606 GN=KRT78 PE=1 SV=2	K2C78_HUMAN	KRT78	57 kDa	Homo sapiens	20	5	28	24	8	6	9	8	10	14	78	6	0	6	0	3
123	Zinc-alpha-2-glycoprotein OS=Homo sapiens OX=9606 GN=AZGP1 PE=1 SV=2	ZA2G_HUMAN	AZGP1	34 kDa	Homo sapiens	15	4	14	8	2	0	0	4	3	0	40	0	6	16	17	13
124	Immunoglobulin heavy variable 5-10-1 OS=Homo sapiens OX=9606 GN=IGHV5-10-1 PE=3 SV=1	HV5X1_HUMAN	IGHV5-10-1	13 kDa	Homo sapiens	0	8	19	47	6	3	0	0	0	0	0	11	7	0	27	0
125	Hemoglobin subunit alpha OS=Homo sapiens OX=9606 GN=HBA1 PE=1 SV=2	HBA_HUMAN	HBA1	15 kDa	Homo sapiens	0	3	0	10	3	0	0	0	0	6	63	5	2	28	11	41
126	Keratin, type I cytoskeletal 13 OS=Homo sapiens OX=9606 GN=KRT13 PE=1 SV=4	K1C13_HUMAN	KRT13	50 kDa	Homo sapiens	78	0	0	55	0	0	0	0	0	36	154	0	0	0	0	0
127	Serpin B12 OS=Homo sapiens OX=9606 GN=SERPINB12 PE=1 SV=1	SPB12_HUMAN	SERPINB12	46 kDa	Homo sapiens	13	0	23	19	5	0	7	2	9	0	64	0	0	5	0	0
128	Immunoglobulin heavy variable 1-69D OS=Homo sapiens OX=9606 GN=IGHV1-69D PE=1 SV=1	HV69D_HUMAN	IGHV1-69D	13 kDa	Homo sapiens	0	0	0	0	0	0	0	0	0	0	23	110	0	0	0	0
129	Filamin-A OS=Homo sapiens OX=9606 GN=FLNA PE=1 SV=4	FLNA_HUMAN	FLNA	281 kDa	Homo sapiens	8	5	3	9	4	3	0	0	0	8	12	26	8	0	5	2
130	Protein-glutamine gamma-glutamyltransferase E OS=Homo sapiens OX=9606 GN=TGM3 PE=1 SV=4	TGM3_HUMAN	TGM3	77 kDa	Homo sapiens	7	0	24	7	0	0	0	0	0	3	70	0	0	0	0	0
131	Hemoglobin subunit beta OS=Homo sapiens OX=9606 GN=HBB PE=1 SV=2	HBB_HUMAN	HBB	16 kDa	Homo sapiens	0	3	0	0	3	0	0	0	4	3	61	0	5	28	29	35
132	Immunoglobulin lambda variable 3-19 OS=Homo sapiens OX=9606 GN=IGLV3-19 PE=1 SV=2	LV319_HUMAN	IGLV3-19	12 kDa	Homo sapiens	4	0	29	8	5	7	3	0	8	3	11	28	4	6	14	0
133	Immunoglobulin lambda variable 3-27 OS=Homo sapiens OX=9606 GN=IGLV3-27 PE=1 SV=2	LV327_HUMAN	IGLV3-27	12 kDa	Homo sapiens	12	0	0	15	0	0	0	0	9	0	0	11	0	0	31	18
134	Annexin A2 OS=Homo sapiens OX=9606 GN=ANXA2 PE=1 SV=2	ANXA2_HUMAN	ANXA2	39 kDa	Homo sapiens	9	2	18	20	7	0	9	0	2	3	68	0	0	7	0	0
135	Immunoglobulin heavy variable 1-8 OS=Homo sapiens OX=9606 GN=IGHV1-8 PE=3 SV=1	HV108_HUMAN	IGHV1-8	13 kDa	Homo sapiens	17	7	23	0	0	8	7	11	41	10	8	46	0	0	0	0
136	Ribonuclease pancreatic OS=Homo sapiens OX=9606 GN=RNASE1 PE=1 SV=4	RNAS1_HUMAN	RNASE1	18 kDa	Homo sapiens	9	15	9	7	0	7	4	4	8	21	0	6	7	8	8	0
137	Complement factor H-related protein 1 OS=Homo sapiens OX=9606 GN=CFHR1 PE=1 SV=2	FHR1_HUMAN	CFHR1	38 kDa	Homo sapiens	8	5	12	0	13	12	6	6	8	16	0	0	11	30	22	19
138	Immunoglobulin heavy variable 3-43D OS=Homo sapiens OX=9606 GN=IGHV3-43D PE=3 SV=1	HV43D_HUMAN	IGHV3-43D	13 kDa	Homo sapiens	0	0	0	0	0	0	0	0	0	0	0	0	0	0	116	0
139	C4b-binding protein alpha chain OS=Homo sapiens OX=9606 GN=C4BPA PE=1 SV=2	C4BPA_HUMAN	C4BPA	67 kDa	Homo sapiens	0	0	0	0	0	0	0	0	0	0	0	0	4	28	50	58
140	Immunoglobulin heavy variable 1-3 OS=Homo sapiens OX=9606 GN=IGHV1-3 PE=3 SV=1	HV103_HUMAN	IGHV1-3	13 kDa	Homo sapiens	0	0	20	35	15	14	0	12	19	3	0	0	16	11	26	0
141	Complement factor D OS=Homo sapiens OX=9606 GN=CFD PE=1 SV=5	CFAD_HUMAN	CFD	27 kDa	Homo sapiens	4	14	2	0	5	6	2	10	2	3	0	4	16	30	14	23
142	Cofilin-1 OS=Homo sapiens OX=9606 GN=CFL1 PE=1 SV=3	COF1_HUMAN	CFL1	19 kDa	Homo sapiens	7	4	10	0	5	0	0	0	0	4	18	27	16	4	15	22
143	Immunoglobulin lambda variable 1-40 OS=Homo sapiens OX=9606 GN=IGLV1-40 PE=1 SV=2	LV140_HUMAN	IGLV1-40	12 kDa	Homo sapiens	7	0	31	7	4	2	0	2	5	0	0	11	0	0	6	2
144	N-acetylmuramoyl-L-alanine amidase OS=Homo sapiens OX=9606 GN=PGLYRP2 PE=1 SV=1	PGRP2_HUMAN	PGLYRP2	62 kDa	Homo sapiens	0	0	0	0	0	0	0	0	0	0	0	0	5	45	51	58
145	Cystatin-C OS=Homo sapiens OX=9606 GN=CST3 PE=1 SV=1	CYTC_HUMAN	CST3	16 kDa	Homo sapiens	4	0	4	0	0	7	6	3	3	8	0	3	7	13	12	8
146	Phosphoglycerate kinase 1 OS=Homo sapiens OX=9606 GN=PGK1 PE=1 SV=3	PGK1_HUMAN	PGK1	45 kDa	Homo sapiens	0	0	3	8	0	0	0	0	0	9	55	23	3	0	11	13
147	Protein S100-A8 OS=Homo sapiens OX=9606 GN=S100A8 PE=1 SV=1	S10A8_HUMAN	S100A8	11 kDa	Homo sapiens	7	3	4	5	0	9	0	0	4	21	31	6	5	0	0	0
148	Caspase-14 OS=Homo sapiens OX=9606 GN=CASP14 PE=1 SV=2	CASPE_HUMAN	CASP14	28 kDa	Homo sapiens	12	0	14	20	0	0	3	0	6	0	67	0	0	0	0	0
149	Immunoglobulin lambda constant 3 OS=Homo sapiens OX=9606 GN=IGLC3 PE=1 SV=1	IGLC3_HUMAN	IGLC3	11 kDa	Homo sapiens	407	365	418	392	472	384	320	329	339	417	0	455	375	314	513	383
150	Immunoglobulin heavy variable 3-64 OS=Homo sapiens OX=9606 GN=IGHV3-64 PE=3 SV=1	HV364_HUMAN	IGHV3-64	13 kDa	Homo sapiens	0	0	37	0	0	67	0	0	0	0	0	0	0	0	0	0
151	Serpin B3 OS=Homo sapiens OX=9606 GN=SERPINB3 PE=1 SV=2	SPB3_HUMAN	SERPINB3	45 kDa	Homo sapiens	7	0	15	8	0	0	11	0	0	2	41	0	0	2	0	0
152	Lysozyme C OS=Homo sapiens OX=9606 GN=LYZ PE=1 SV=1	LYSC_HUMAN	LYZ	17 kDa	Homo sapiens	11	7	13	5	4	14	0	0	6	0	18	8	5	0	0	0
153	Pyruvate kinase PKM OS=Homo sapiens OX=9606 GN=PKM PE=1 SV=4	KPYM_HUMAN	PKM	58 kDa	Homo sapiens	0	0	5	6	0	0	0	0	0	0	31	7	0	3	22	28
154	Gelsolin OS=Homo sapiens OX=9606 GN=GSN PE=1 SV=1	GELS_HUMAN	GSN	86 kDa	Homo sapiens	0	0	0	0	0	47	17	30	0	0	0	0	0	3	0	0
155	Immunoglobulin lambda variable 2-11 OS=Homo sapiens OX=9606 GN=IGLV2-11 PE=1 SV=2	LV211_HUMAN	IGLV2-11	13 kDa	Homo sapiens	17	17	14	15	23	0	0	23	10	0	0	25	0	0	12	0
156	Immunoglobulin heavy variable 4-30-2 OS=Homo sapiens OX=9606 GN=IGHV4-30-2 PE=3 SV=1	HV432_HUMAN	IGHV4-30-2	13 kDa	Homo sapiens	0	0	0	96	0	77	0	0	0	0	0	125	0	0	0	0
157	Arginase-1 OS=Homo sapiens OX=9606 GN=ARG1 PE=1 SV=2	ARGI1_HUMAN	ARG1	35 kDa	Homo sapiens	18	3	20	14	3	0	0	3	2	3	45	0	0	0	0	0
158	Keratin, type II cytoskeletal 1b OS=Homo sapiens OX=9606 GN=KRT77 PE=2 SV=3	K2C1B_HUMAN	KRT77	62 kDa	Homo sapiens	38	0	62	38	27	0	0	0	0	0	136	0	0	0	0	0
159	Neuroblast differentiation-associated protein AHNAK OS=Homo sapiens OX=9606 GN=AHNAK PE=1 SV=2	AHNK_HUMAN	AHNAK	629 kDa	Homo sapiens	0	0	0	0	0	0	0	0	0	0	8	0	0	0	0	0
160	Protein S100-A7 OS=Homo sapiens OX=9606 GN=S100A7 PE=1 SV=4	S10A7_HUMAN	S100A7	11 kDa	Homo sapiens	8	2	14	6	3	3	5	5	6	4	26	2	2	5	4	3
161	Immunoglobulin lambda variable 9-49 OS=Homo sapiens OX=9606 GN=IGLV9-49 PE=1 SV=1	LV949_HUMAN	IGLV9-49	13 kDa	Homo sapiens	0	3	6	5	3	0	3	8	0	8	0	18	0	0	12	6
162	Fibronectin OS=Homo sapiens OX=9606 GN=FN1 PE=1 SV=4	FINC_HUMAN	FN1	263 kDa	Homo sapiens	0	0	18	0	0	16	6	11	0	0	0	0	3	4	3	4
163	Complement component C7 OS=Homo sapiens OX=9606 GN=C7 PE=1 SV=2	CO7_HUMAN	C7	94 kDa	Homo sapiens	0	0	0	0	0	0	0	0	0	0	0	0	4	12	42	36
164	Triosephosphate isomerase OS=Homo sapiens OX=9606 GN=TPI1 PE=1 SV=3	TPIS_HUMAN	TPI1	31 kDa	Homo sapiens	0	0	0	4	0	0	0	0	0	4	75	9	0	0	7	7
165	Dermcidin OS=Homo sapiens OX=9606 GN=DCD PE=1 SV=2	DCD_HUMAN	DCD	11 kDa	Homo sapiens	6	2	12	7	0	5	6	3	8	4	29	0	0	0	0	0
166	Immunoglobulin heavy variable 3-20 OS=Homo sapiens OX=9606 GN=IGHV3-20 PE=3 SV=2	HV320_HUMAN	IGHV3-20	13 kDa	Homo sapiens	0	0	42	37	0	0	0	0	27	0	0	69	39	0	66	0
167	Fatty acid-binding protein 5 OS=Homo sapiens OX=9606 GN=FABP5 PE=1 SV=3	FABP5_HUMAN	FABP5	15 kDa	Homo sapiens	4	0	29	5	0	0	0	0	2	0	53	0	0	0	0	0
168	Keratin, type I cuticular Ha1 OS=Homo sapiens OX=9606 GN=KRT31 PE=1 SV=3	K1H1_HUMAN	KRT31	47 kDa	Homo sapiens	12	0	27	0	6	0	0	0	0	0	9	0	5	18	0	0
169	Immunoglobulin lambda variable 7-46 OS=Homo sapiens OX=9606 GN=IGLV7-46 PE=3 SV=4	LV746_HUMAN	IGLV7-46	12 kDa	Homo sapiens	11	0	12	10	2	0	3	7	5	5	0	6	0	4	9	0
170	Vinculin OS=Homo sapiens OX=9606 GN=VCL PE=1 SV=4	VINC_HUMAN	VCL	124 kDa	Homo sapiens	0	0	0	0	0	0	0	0	0	0	9	0	0	0	30	45
171	Immunoglobulin lambda variable 8-61 OS=Homo sapiens OX=9606 GN=IGLV8-61 PE=3 SV=7	LV861_HUMAN	IGLV8-61	13 kDa	Homo sapiens	8	0	14	4	7	0	4	7	6	0	0	10	2	0	13	6
172	Ceruloplasmin OS=Homo sapiens OX=9606 GN=CP PE=1 SV=1	CERU_HUMAN	CP	122 kDa	Homo sapiens	0	0	0	0	0	0	0	0	0	0	0	0	0	90	0	8
173	Protein/nucleic acid deglycase DJ-1 OS=Homo sapiens OX=9606 GN=PARK7 PE=1 SV=2	PARK7_HUMAN	PARK7	20 kDa	Homo sapiens	2	0	3	5	2	0	0	0	0	6	37	4	3	3	3	3
174	Immunoglobulin heavy variable 4-4 OS=Homo sapiens OX=9606 GN=IGHV4-4 PE=3 SV=2	HV404_HUMAN	IGHV4-4	13 kDa	Homo sapiens	0	0	0	94	55	69	47	73	0	52	0	0	75	0	0	0
175	Plakophilin-1 OS=Homo sapiens OX=9606 GN=PKP1 PE=1 SV=2	PKP1_HUMAN	PKP1	83 kDa	Homo sapiens	2	0	8	8	0	0	0	0	0	0	55	0	0	0	0	0
176	Transketolase OS=Homo sapiens OX=9606 GN=TKT PE=1 SV=3	TKT_HUMAN	TKT	68 kDa	Homo sapiens	0	0	0	0	0	0	0	0	0	4	69	0	0	0	0	0
177	Protein-glutamine gamma-glutamyltransferase K OS=Homo sapiens OX=9606 GN=TGM1 PE=1 SV=4	TGM1_HUMAN	TGM1	90 kDa	Homo sapiens	0	0	6	3	0	0	0	0	0	0	37	0	0	0	0	0
178	Neutrophil gelatinase-associated lipocalin OS=Homo sapiens OX=9606 GN=LCN2 PE=1 SV=2	NGAL_HUMAN	LCN2	23 kDa	Homo sapiens	15	4	4	3	0	6	0	7	3	4	20	10	0	5	0	0
179	Filaggrin OS=Homo sapiens OX=9606 GN=FLG PE=1 SV=3	FILA_HUMAN	FLG	435 kDa	Homo sapiens	7	0	7	10	0	0	6	3	0	0	14	0	0	3	0	0
180	Keratin, type II cytoskeletal 80 OS=Homo sapiens OX=9606 GN=KRT80 PE=1 SV=2	K2C80_HUMAN	KRT80	51 kDa	Homo sapiens	101	0	71	99	0	0	132	0	48	0	113	0	0	44	0	0
181	Complement C1q subcomponent subunit C OS=Homo sapiens OX=9606 GN=C1QC PE=1 SV=3	C1QC_HUMAN	C1QC	26 kDa	Homo sapiens	2	0	3	0	0	3	2	0	5	5	0	0	0	5	7	6
182	Immunoglobulin lambda variable 2-8 OS=Homo sapiens OX=9606 GN=IGLV2-8 PE=1 SV=2	LV208_HUMAN	IGLV2-8	12 kDa	Homo sapiens	0	0	16	0	0	0	0	17	8	0	0	19	0	0	0	0
183	Immunoglobulin kappa variable 1D-16 OS=Homo sapiens OX=9606 GN=IGKV1D-16 PE=3 SV=2	KVD16_HUMAN	IGKV1D-16	13 kDa	Homo sapiens	0	0	11	9	0	0	4	15	0	0	0	0	7	0	4	0
184	Inter-alpha-trypsin inhibitor heavy chain H4 OS=Homo sapiens OX=9606 GN=ITIH4 PE=1 SV=4	ITIH4_HUMAN	ITIH4	103 kDa	Homo sapiens	0	0	0	0	0	25	0	10	0	0	0	0	0	12	9	12
185	Huntingtin OS=Homo sapiens OX=9606 GN=HTT PE=1 SV=2	HD_HUMAN	HTT	348 kDa	Homo sapiens	0	0	0	0	0	0	0	0	2	0	0	0	0	7	0	0
186	Vitamin D-binding protein OS=Homo sapiens OX=9606 GN=GC PE=1 SV=2	VTDB_HUMAN	GC	53 kDa	Homo sapiens	0	0	2	0	0	0	0	0	0	0	0	2	3	30	15	17
187	Procollagen C-endopeptidase enhancer 1 OS=Homo sapiens OX=9606 GN=PCOLCE PE=1 SV=2	PCOC1_HUMAN	PCOLCE	48 kDa	Homo sapiens	0	0	0	0	0	0	0	0	0	3	0	0	9	15	4	4
188	Platelet basic protein OS=Homo sapiens OX=9606 GN=PPBP PE=1 SV=3	CXCL7_HUMAN	PPBP	14 kDa	Homo sapiens	0	0	0	0	0	26	0	20	0	0	0	0	5	3	9	4
189	Immunoglobulin heavy variable 7-4-1 OS=Homo sapiens OX=9606 GN=IGHV7-4-1 PE=3 SV=1	HV741_HUMAN	IGHV7-4-1	13 kDa	Homo sapiens	0	0	0	35	37	0	0	0	24	0	0	0	19	12	26	0
190	Skin-specific protein 32 OS=Homo sapiens OX=9606 GN=XP32 PE=1 SV=1	XP32_HUMAN	XP32	26 kDa	Homo sapiens	0	0	12	6	0	0	0	0	0	0	20	0	0	0	0	0
191	Immunoglobulin lambda variable 2-18 OS=Homo sapiens OX=9606 GN=IGLV2-18 PE=3 SV=2	LV218_HUMAN	IGLV2-18	12 kDa	Homo sapiens	0	2	7	3	0	0	0	14	0	0	0	0	0	0	2	0
192	Cathepsin D OS=Homo sapiens OX=9606 GN=CTSD PE=1 SV=1	CATD_HUMAN	CTSD	45 kDa	Homo sapiens	2	0	7	0	0	0	3	0	0	5	42	0	0	0	0	0
193	Actin, cytoplasmic 1 OS=Homo sapiens OX=9606 GN=ACTB PE=1 SV=1	ACTB_HUMAN	ACTB	42 kDa	Homo sapiens	5	0	4	0	0	0	0	0	0	0	32	0	0	0	4	18
194	Immunoglobulin lambda variable 1-36 OS=Homo sapiens OX=9606 GN=IGLV1-36 PE=1 SV=5	LV136_HUMAN	IGLV1-36	12 kDa	Homo sapiens	0	7	4	0	8	0	0	0	0	0	0	7	7	0	17	0
195	Glutathione reductase, mitochondrial OS=Homo sapiens OX=9606 GN=GSR PE=1 SV=2	GSHR_HUMAN	GSR	56 kDa	Homo sapiens	0	0	0	0	0	0	0	0	0	13	26	3	0	0	6	0
196	Immunoglobulin lambda constant 7 OS=Homo sapiens OX=9606 GN=IGLC7 PE=1 SV=3	IGLC7_HUMAN	IGLC7	11 kDa	Homo sapiens	237	183	282	249	0	201	0	165	162	206	0	246	190	149	217	167
197	Immunoglobulin heavy variable 4-34 OS=Homo sapiens OX=9606 GN=IGHV4-34 PE=1 SV=2	HV434_HUMAN	IGHV4-34	14 kDa	Homo sapiens	0	0	0	0	0	0	0	0	0	0	0	0	0	0	162	0
198	Carbonic anhydrase 2 OS=Homo sapiens OX=9606 GN=CA2 PE=1 SV=2	CAH2_HUMAN	CA2	29 kDa	Homo sapiens	3	0	6	2	0	0	8	0	10	3	8	11	0	2	0	4
199	Peptidyl-prolyl cis-trans isomerase B OS=Homo sapiens OX=9606 GN=PPIB PE=1 SV=2	PPIB_HUMAN	PPIB	24 kDa	Homo sapiens	4	0	4	7	0	0	0	0	0	2	9	14	6	0	3	3
200	Myosin-13 OS=Homo sapiens OX=9606 GN=MYH13 PE=2 SV=2	MYH13_HUMAN	MYH13	224 kDa	Homo sapiens	0	0	0	0	0	0	0	0	0	2	0	0	0	0	0	0
201	Complement C1q subcomponent subunit A OS=Homo sapiens OX=9606 GN=C1QA PE=1 SV=2	C1QA_HUMAN	C1QA	26 kDa	Homo sapiens	0	0	0	0	0	2	2	0	4	6	0	0	0	12	14	11
202	Complement factor H OS=Homo sapiens OX=9606 GN=CFH PE=1 SV=4	CFAH_HUMAN	CFH	139 kDa	Homo sapiens	0	0	0	0	0	0	0	0	0	3	0	0	0	30	10	6
203	Immunoglobulin kappa variable 1-13 OS=Homo sapiens OX=9606 GN=IGKV1-13 PE=3 SV=1	KV113_HUMAN (+1)	IGKV1-13	13 kDa	Homo sapiens	5	9	0	6	2	9	0	0	0	0	0	16	0	0	0	0
204	Pancreatic alpha-amylase OS=Homo sapiens OX=9606 GN=AMY2A PE=1 SV=2	AMYP_HUMAN	AMY2A	58 kDa	Homo sapiens	15	0	0	4	8	0	2	0	2	7	7	4	0	3	2	3
205	Bleomycin hydrolase OS=Homo sapiens OX=9606 GN=BLMH PE=1 SV=1	BLMH_HUMAN	BLMH	53 kDa	Homo sapiens	4	0	5	6	0	0	0	0	0	0	32	0	0	0	0	0
206	Lactotransferrin OS=Homo sapiens OX=9606 GN=LTF PE=1 SV=6	TRFL_HUMAN	LTF	78 kDa	Homo sapiens	0	0	0	0	0	0	0	0	0	0	25	0	0	0	0	0
207	Immunoglobulin lambda variable 2-23 OS=Homo sapiens OX=9606 GN=IGLV2-23 PE=1 SV=2	LV223_HUMAN	IGLV2-23	12 kDa	Homo sapiens	0	0	0	0	0	0	3	0	0	0	0	7	0	0	0	0
208	Apolipoprotein E OS=Homo sapiens OX=9606 GN=APOE PE=1 SV=1	APOE_HUMAN	APOE	36 kDa	Homo sapiens	0	0	0	0	0	0	0	0	0	0	0	0	0	7	33	38
209	Complement C1q subcomponent subunit B OS=Homo sapiens OX=9606 GN=C1QB PE=1 SV=3	C1QB_HUMAN	C1QB	27 kDa	Homo sapiens	0	0	4	0	0	4	0	0	3	6	0	0	0	9	9	14
210	Corneodesmosin OS=Homo sapiens OX=9606 GN=CDSN PE=1 SV=3	CDSN_HUMAN	CDSN	52 kDa	Homo sapiens	0	0	0	4	0	0	0	0	0	0	36	0	0	0	0	0
211	Pleckstrin OS=Homo sapiens OX=9606 GN=PLEK PE=1 SV=3	PLEK_HUMAN	PLEK	40 kDa	Homo sapiens	0	0	0	0	0	0	0	0	0	0	0	2	13	0	23	25
212	Immunoglobulin lambda constant 6 OS=Homo sapiens OX=9606 GN=IGLC6 PE=1 SV=1	IGLC6_HUMAN	IGLC6	11 kDa	Homo sapiens	0	0	0	0	0	0	0	0	0	257	0	0	0	0	0	0
213	Collagen alpha-1(I) chain OS=Homo sapiens OX=9606 GN=COL1A1 PE=1 SV=5	CO1A1_HUMAN	COL1A1	139 kDa	Homo sapiens	0	0	0	0	0	0	0	0	0	0	10	0	0	0	0	0
214	Extracellular matrix protein 1 OS=Homo sapiens OX=9606 GN=ECM1 PE=1 SV=2	ECM1_HUMAN	ECM1	61 kDa	Homo sapiens	5	0	2	6	0	0	0	0	0	0	36	0	0	0	0	0
215	Trinucleotide repeat-containing gene 18 protein OS=Homo sapiens OX=9606 GN=TNRC18 PE=1 SV=3	TNC18_HUMAN	TNRC18	315 kDa	Homo sapiens	2	0	0	0	0	0	0	0	0	0	0	0	0	0	0	0
216	Cystatin-A OS=Homo sapiens OX=9606 GN=CSTA PE=1 SV=1	CYTA_HUMAN	CSTA	11 kDa	Homo sapiens	5	0	4	7	0	0	0	0	0	0	21	0	0	0	0	0
217	Annexin A1 OS=Homo sapiens OX=9606 GN=ANXA1 PE=1 SV=2	ANXA1_HUMAN	ANXA1	39 kDa	Homo sapiens	24	0	0	12	0	0	0	0	0	5	21	0	0	0	0	0
218	Glucose-6-phosphate isomerase OS=Homo sapiens OX=9606 GN=GPI PE=1 SV=4	G6PI_HUMAN	GPI	63 kDa	Homo sapiens	0	2	0	0	2	0	0	0	0	0	22	0	2	0	10	4
219	Immunoglobulin heavy variable 3-33 OS=Homo sapiens OX=9606 GN=IGHV3-33 PE=1 SV=2	HV333_HUMAN	IGHV3-33	13 kDa	Homo sapiens	73	0	0	105	0	136	0	0	0	0	48	196	87	0	192	0
220	Immunoglobulin lambda-like polypeptide 1 OS=Homo sapiens OX=9606 GN=IGLL1 PE=1 SV=1	IGLL1_HUMAN	IGLL1	23 kDa	Homo sapiens	0	0	0	0	0	6	0	0	0	0	0	0	0	0	0	0
221	Suprabasin OS=Homo sapiens OX=9606 GN=SBSN PE=1 SV=2	SBSN_HUMAN	SBSN	61 kDa	Homo sapiens	4	0	5	7	0	0	3	0	0	0	15	0	0	4	0	0
222	Immunoglobulin lambda variable 3-1 OS=Homo sapiens OX=9606 GN=IGLV3-1 PE=1 SV=2	LV301_HUMAN	IGLV3-1	12 kDa	Homo sapiens	8	11	6	4	2	9	0	7	0	0	0	13	0	0	8	0
223	Rho GTPase-activating protein 5 OS=Homo sapiens OX=9606 GN=ARHGAP5 PE=1 SV=2	RHG05_HUMAN	ARHGAP5	172 kDa	Homo sapiens	0	0	0	0	0	0	0	0	0	0	0	0	0	2	0	0
224	Ectonucleotide pyrophosphatase/phosphodiesterase family member 2 OS=Homo sapiens OX=9606 GN=ENPP2 PE=1 SV=3	ENPP2_HUMAN	ENPP2	99 kDa	Homo sapiens	0	0	0	0	0	5	4	6	0	0	0	0	0	7	7	14
225	Serum amyloid A-4 protein OS=Homo sapiens OX=9606 GN=SAA4 PE=1 SV=2	SAA4_HUMAN	SAA4	15 kDa	Homo sapiens	0	0	0	0	0	0	0	0	0	0	0	0	0	7	10	20
226	Angiogenin OS=Homo sapiens OX=9606 GN=ANG PE=1 SV=1	ANGI_HUMAN	ANG	17 kDa	Homo sapiens	0	0	0	0	5	7	0	0	0	8	0	0	0	0	0	0
227	Arachidonate 12-lipoxygenase, 12R-type OS=Homo sapiens OX=9606 GN=ALOX12B PE=1 SV=1	LX12B_HUMAN	ALOX12B	80 kDa	Homo sapiens	0	0	0	0	0	0	0	0	0	0	31	0	0	0	0	0
228	Glutathione S-transferase omega-1 OS=Homo sapiens OX=9606 GN=GSTO1 PE=1 SV=2	GSTO1_HUMAN	GSTO1	28 kDa	Homo sapiens	0	0	0	3	0	0	0	0	0	0	13	8	4	0	4	4
229	Thioredoxin OS=Homo sapiens OX=9606 GN=TXN PE=1 SV=3	THIO_HUMAN	TXN	12 kDa	Homo sapiens	0	0	4	3	0	0	0	0	0	3	11	0	0	0	0	0
230	Immunoglobulin kappa variable 3D-20 OS=Homo sapiens OX=9606 GN=IGKV3D-20 PE=3 SV=1	KVD20_HUMAN	IGKV3D-20	13 kDa	Homo sapiens	0	0	128	182	0	0	0	0	0	0	0	159	0	194	0	0
231	Histone H1.3 OS=Homo sapiens OX=9606 GN=HIST1H1D PE=1 SV=2	H13_HUMAN	HIST1H1D	22 kDa	Homo sapiens	0	0	0	0	0	0	0	0	0	0	3	0	0	0	0	0
232	Transgelin-2 OS=Homo sapiens OX=9606 GN=TAGLN2 PE=1 SV=3	TAGL2_HUMAN	TAGLN2	22 kDa	Homo sapiens	0	0	0	0	0	0	0	2	0	0	0	6	2	0	14	15
233	Gamma-glutamylcyclotransferase OS=Homo sapiens OX=9606 GN=GGCT PE=1 SV=1	GGCT_HUMAN	GGCT	21 kDa	Homo sapiens	0	0	3	0	0	0	0	0	0	0	30	0	0	0	0	0
234	Histidine ammonia-lyase OS=Homo sapiens OX=9606 GN=HAL PE=1 SV=1	HUTH_HUMAN	HAL	73 kDa	Homo sapiens	3	0	0	5	0	0	0	0	0	0	19	0	0	0	0	0
235	Fetuin-B OS=Homo sapiens OX=9606 GN=FETUB PE=1 SV=2	FETUB_HUMAN	FETUB	42 kDa	Homo sapiens	0	0	0	0	0	0	0	0	0	0	0	0	0	12	9	17
236	Antithrombin-III OS=Homo sapiens OX=9606 GN=SERPINC1 PE=1 SV=1	ANT3_HUMAN	SERPINC1	53 kDa	Homo sapiens	0	0	0	0	0	0	0	0	0	0	0	0	0	29	5	10
237	Alpha-1B-glycoprotein OS=Homo sapiens OX=9606 GN=A1BG PE=1 SV=4	A1BG_HUMAN	A1BG	54 kDa	Homo sapiens	0	0	0	0	0	0	0	0	0	0	0	0	0	31	5	8
238	Kallistatin OS=Homo sapiens OX=9606 GN=SERPINA4 PE=1 SV=3	KAIN_HUMAN	SERPINA4	49 kDa	Homo sapiens	0	0	0	0	0	0	0	0	0	0	0	0	0	11	15	21
239	Immunoglobulin heavy variable 1-24 OS=Homo sapiens OX=9606 GN=IGHV1-24 PE=3 SV=1	HV124_HUMAN	IGHV1-24	13 kDa	Homo sapiens	0	0	2	0	0	0	0	0	0	0	0	0	0	5	14	0
240	Thymosin beta-4 OS=Homo sapiens OX=9606 GN=TMSB4X PE=1 SV=2	TYB4_HUMAN	TMSB4X	5 kDa	Homo sapiens	0	0	0	0	0	0	0	0	0	0	19	0	0	0	0	0
241	Late cornified envelope protein 1C OS=Homo sapiens OX=9606 GN=LCE1C PE=2 SV=1	LCE1C_HUMAN	LCE1C	12 kDa	Homo sapiens	0	0	0	3	0	0	0	0	0	0	3	0	0	2	0	0
242	E3 ubiquitin-protein ligase UBR4 OS=Homo sapiens OX=9606 GN=UBR4 PE=1 SV=1	UBR4_HUMAN	UBR4	574 kDa	Homo sapiens	3	0	0	0	0	0	0	0	0	0	0	0	0	0	0	0
243	Small proline-rich protein 2D OS=Homo sapiens OX=9606 GN=SPRR2D PE=2 SV=2	SPR2D_HUMAN	SPRR2D	8 kDa	Homo sapiens	0	0	3	0	0	0	0	0	0	0	4	0	0	3	0	0
244	Immunoglobulin kappa variable 1D-17 OS=Homo sapiens OX=9606 GN=IGKV1D-17 PE=3 SV=1	KVD17_HUMAN	IGKV1D-17	13 kDa	Homo sapiens	0	0	0	0	0	0	0	0	0	0	0	2	0	2	5	0
245	Phosphatidylethanolamine-binding protein 1 OS=Homo sapiens OX=9606 GN=PEBP1 PE=1 SV=3	PEBP1_HUMAN	PEBP1	21 kDa	Homo sapiens	0	0	0	0	0	0	0	0	0	0	39	4	0	0	0	0
246	Keratin, type I cytoskeletal 23 OS=Homo sapiens OX=9606 GN=KRT23 PE=1 SV=2	K1C23_HUMAN	KRT23	48 kDa	Homo sapiens	0	0	0	0	0	0	0	0	0	0	28	0	0	0	0	0
247	Transthyretin OS=Homo sapiens OX=9606 GN=TTR PE=1 SV=1	TTHY_HUMAN	TTR	16 kDa	Homo sapiens	0	0	0	0	0	0	0	0	0	0	0	0	0	31	0	13
248	Immunoglobulin lambda variable 5-37 OS=Homo sapiens OX=9606 GN=IGLV5-37 PE=3 SV=1	LV537_HUMAN	IGLV5-37	13 kDa	Homo sapiens	0	0	8	0	0	0	0	0	0	0	0	9	0	0	0	0
249	Peroxiredoxin-2 OS=Homo sapiens OX=9606 GN=PRDX2 PE=1 SV=5	PRDX2_HUMAN	PRDX2	22 kDa	Homo sapiens	0	0	5	0	0	0	0	0	0	0	25	0	0	0	0	0
250	Immunoglobulin lambda variable 5-39 OS=Homo sapiens OX=9606 GN=IGLV5-39 PE=3 SV=1	LV539_HUMAN	IGLV5-39	13 kDa	Homo sapiens	0	0	5	0	0	0	0	0	2	0	0	0	0	5	0	0
251	Prostaglandin-H2 D-isomerase OS=Homo sapiens OX=9606 GN=PTGDS PE=1 SV=1	PTGDS_HUMAN	PTGDS	21 kDa	Homo sapiens	2	0	10	2	0	0	0	5	2	0	0	4	0	5	0	0
252	Complement C5 OS=Homo sapiens OX=9606 GN=C5 PE=1 SV=4	CO5_HUMAN	C5	188 kDa	Homo sapiens	0	0	0	0	0	0	0	0	0	0	0	0	0	13	0	0
253	Keratin, type II cytoskeletal 3 OS=Homo sapiens OX=9606 GN=KRT3 PE=1 SV=3	K2C3_HUMAN	KRT3	64 kDa	Homo sapiens	0	0	0	0	0	0	0	0	0	0	119	0	0	0	0	0
254	Peroxiredoxin-6 OS=Homo sapiens OX=9606 GN=PRDX6 PE=1 SV=3	PRDX6_HUMAN	PRDX6	25 kDa	Homo sapiens	0	0	0	0	0	0	0	0	0	0	4	0	0	0	10	18
255	Methionine adenosyltransferase 2 subunit beta OS=Homo sapiens OX=9606 GN=MAT2B PE=1 SV=1	MAT2B_HUMAN	MAT2B	38 kDa	Homo sapiens	0	0	0	0	2	0	0	0	0	0	0	0	0	0	0	0
256	Prolactin-inducible protein OS=Homo sapiens OX=9606 GN=PIP PE=1 SV=1	PIP_HUMAN	PIP	17 kDa	Homo sapiens	0	0	6	5	0	0	0	0	3	0	9	0	0	0	0	0
257	Cysteine-rich C-terminal protein 1 OS=Homo sapiens OX=9606 GN=CRCT1 PE=1 SV=1	CRCT1_HUMAN	CRCT1	10 kDa	Homo sapiens	0	0	0	0	0	0	0	0	0	0	5	0	0	0	0	0
258	Plectin OS=Homo sapiens OX=9606 GN=PLEC PE=1 SV=3	PLEC_HUMAN	PLEC	532 kDa	Homo sapiens	0	0	0	0	0	0	0	0	0	0	4	0	0	0	0	0
259	Alpha-2-antiplasmin OS=Homo sapiens OX=9606 GN=SERPINF2 PE=1 SV=3	A2AP_HUMAN	SERPINF2	55 kDa	Homo sapiens	0	0	0	0	0	0	0	0	0	0	0	0	0	4	8	19
260	Moesin OS=Homo sapiens OX=9606 GN=MSN PE=1 SV=3	MOES_HUMAN	MSN	68 kDa	Homo sapiens	0	0	0	0	0	0	0	0	0	0	0	0	0	0	12	15
261	Keratin, type II cuticular Hb5 OS=Homo sapiens OX=9606 GN=KRT85 PE=1 SV=1	KRT85_HUMAN	KRT85	56 kDa	Homo sapiens	9	0	41	0	0	0	0	0	0	0	0	0	0	30	0	0
262	Gasdermin-A OS=Homo sapiens OX=9606 GN=GSDMA PE=1 SV=4	GSDMA_HUMAN	GSDMA	49 kDa	Homo sapiens	0	0	0	0	0	0	0	0	0	0	12	0	0	0	0	0
263	Collagen alpha-1(XVIII) chain OS=Homo sapiens OX=9606 GN=COL18A1 PE=1 SV=5	COIA1_HUMAN	COL18A1	178 kDa	Homo sapiens	0	0	6	0	0	4	0	2	0	0	0	0	0	0	0	0
264	Ubiquitin-40S ribosomal protein S27a OS=Homo sapiens OX=9606 GN=RPS27A PE=1 SV=2	RS27A_HUMAN	RPS27A	18 kDa	Homo sapiens	0	0	0	3	0	0	0	0	0	0	17	0	0	0	0	0
265	Keratin, type I cuticular Ha3-II OS=Homo sapiens OX=9606 GN=KRT33B PE=1 SV=3	KT33B_HUMAN	KRT33B	46 kDa	Homo sapiens	0	0	26	0	0	0	0	0	0	0	9	0	0	13	0	0
266	Peroxiredoxin-1 OS=Homo sapiens OX=9606 GN=PRDX1 PE=1 SV=1	PRDX1_HUMAN	PRDX1	22 kDa	Homo sapiens	0	0	6	0	0	0	0	0	0	0	23	0	0	0	0	0
267	Alpha-1-antichymotrypsin OS=Homo sapiens OX=9606 GN=SERPINA3 PE=1 SV=2	AACT_HUMAN	SERPINA3	48 kDa	Homo sapiens	0	0	0	0	0	0	0	0	0	0	0	0	0	34	0	0
268	Desmocollin-3 OS=Homo sapiens OX=9606 GN=DSC3 PE=1 SV=3	DSC3_HUMAN	DSC3	100 kDa	Homo sapiens	0	0	4	0	0	0	0	0	0	0	17	0	0	0	0	0
269	Loricrin OS=Homo sapiens OX=9606 GN=LOR PE=1 SV=2	LORI_HUMAN	LOR	26 kDa	Homo sapiens	0	0	3	0	0	0	0	0	0	0	7	0	0	0	0	0
270	CD5 antigen-like OS=Homo sapiens OX=9606 GN=CD5L PE=1 SV=1	CD5L_HUMAN	CD5L	38 kDa	Homo sapiens	0	0	0	0	0	0	0	0	0	0	0	0	0	0	9	17
271	Trypsin-3 OS=Homo sapiens OX=9606 GN=PRSS3 PE=1 SV=2	TRY3_HUMAN	PRSS3	33 kDa	Homo sapiens	0	0	0	0	0	0	0	0	0	0	3	0	0	0	0	0
272	Lumican OS=Homo sapiens OX=9606 GN=LUM PE=1 SV=2	LUM_HUMAN	LUM	38 kDa	Homo sapiens	0	2	0	0	0	0	2	0	0	0	0	0	0	5	5	2
273	Keratin, type II cytoskeletal 2 oral OS=Homo sapiens OX=9606 GN=KRT76 PE=1 SV=2	K22O_HUMAN	KRT76	66 kDa	Homo sapiens	0	0	0	0	0	0	0	0	0	0	115	0	0	0	0	0
274	Non-secretory ribonuclease OS=Homo sapiens OX=9606 GN=RNASE2 PE=1 SV=2	RNAS2_HUMAN	RNASE2	18 kDa	Homo sapiens	0	0	0	0	0	0	0	0	0	0	31	0	0	0	0	0
275	Heat shock protein beta-1 OS=Homo sapiens OX=9606 GN=HSPB1 PE=1 SV=2	HSPB1_HUMAN	HSPB1	23 kDa	Homo sapiens	0	0	0	0	0	0	0	0	0	0	11	0	0	0	0	0
276	Immunoglobulin heavy variable 1-58 OS=Homo sapiens OX=9606 GN=IGHV1-58 PE=3 SV=1	HV158_HUMAN	IGHV1-58	13 kDa	Homo sapiens	0	0	0	0	0	0	0	0	0	0	0	3	0	0	7	0
277	Hydroperoxide isomerase ALOXE3 OS=Homo sapiens OX=9606 GN=ALOXE3 PE=1 SV=1	LOXE3_HUMAN	ALOXE3	81 kDa	Homo sapiens	0	0	0	0	0	0	0	0	0	0	11	0	0	0	0	0
278	PDZ domain-containing protein 2 OS=Homo sapiens OX=9606 GN=PDZD2 PE=1 SV=4	PDZD2_HUMAN	PDZD2	302 kDa	Homo sapiens	0	0	0	0	0	0	0	0	0	0	0	0	0	2	0	0
279	Keratin, type I cuticular Ha4 OS=Homo sapiens OX=9606 GN=KRT34 PE=1 SV=2	KRT34_HUMAN	KRT34	49 kDa	Homo sapiens	0	0	23	0	0	0	0	0	0	0	0	0	0	6	0	0
280	Serpin B8 OS=Homo sapiens OX=9606 GN=SERPINB8 PE=1 SV=2	SPB8_HUMAN	SERPINB8	43 kDa	Homo sapiens	0	0	0	0	0	0	0	0	0	0	7	0	0	0	0	0
281	Vitamin K-dependent protein S OS=Homo sapiens OX=9606 GN=PROS1 PE=1 SV=1	PROS_HUMAN	PROS1	75 kDa	Homo sapiens	0	0	0	0	0	0	0	0	0	0	0	0	0	2	4	13
282	Immunoglobulin lambda variable 4-60 OS=Homo sapiens OX=9606 GN=IGLV4-60 PE=3 SV=1	LV460_HUMAN	IGLV4-60	13 kDa	Homo sapiens	0	0	2	0	0	0	0	0	0	0	0	2	0	0	0	0
283	Protein TSSC4 OS=Homo sapiens OX=9606 GN=TSSC4 PE=1 SV=3	TSSC4_HUMAN	TSSC4	34 kDa	Homo sapiens	0	0	0	0	0	0	0	0	0	0	0	0	0	2	0	0
284	Protein S100-A16 OS=Homo sapiens OX=9606 GN=S100A16 PE=1 SV=1	S10AG_HUMAN	S100A16	12 kDa	Homo sapiens	0	0	0	4	0	0	0	0	0	0	17	0	0	0	0	0
285	Immunoglobulin kappa variable 2-29 OS=Homo sapiens OX=9606 GN=IGKV2-29 PE=3 SV=2	KV229_HUMAN	IGKV2-29	13 kDa	Homo sapiens	32	0	0	0	15	0	0	24	0	0	0	0	0	0	0	0
286	Galectin-3-binding protein OS=Homo sapiens OX=9606 GN=LGALS3BP PE=1 SV=1	LG3BP_HUMAN	LGALS3BP	65 kDa	Homo sapiens	0	0	0	0	0	0	0	0	0	0	0	0	0	0	9	14
287	Keratin, type II cytoskeletal 6B OS=Homo sapiens OX=9606 GN=KRT6B PE=1 SV=5	K2C6B_HUMAN	KRT6B	60 kDa	Homo sapiens	154	0	204	0	0	0	0	0	0	0	435	0	0	0	0	0
288	Gamma-glutamyl hydrolase OS=Homo sapiens OX=9606 GN=GGH PE=1 SV=2	GGH_HUMAN	GGH	36 kDa	Homo sapiens	0	0	0	0	0	0	0	0	0	0	5	0	0	0	0	3
289	Galectin-7 OS=Homo sapiens OX=9606 GN=LGALS7 PE=1 SV=2	LEG7_HUMAN	LGALS7	15 kDa	Homo sapiens	0	0	4	5	0	0	0	0	0	0	8	0	0	0	0	0
290	Protein S100-A14 OS=Homo sapiens OX=9606 GN=S100A14 PE=1 SV=1	S10AE_HUMAN	S100A14	12 kDa	Homo sapiens	4	0	3	0	0	0	0	0	0	0	11	0	0	0	0	0
291	Carboxypeptidase B2 OS=Homo sapiens OX=9606 GN=CPB2 PE=1 SV=2	CBPB2_HUMAN	CPB2	48 kDa	Homo sapiens	0	0	0	0	0	0	0	0	0	0	0	0	0	3	3	9
292	Talin-1 OS=Homo sapiens OX=9606 GN=TLN1 PE=1 SV=3	TLN1_HUMAN	TLN1	270 kDa	Homo sapiens	0	0	0	0	0	0	0	0	0	0	0	0	0	0	6	6
293	Insulin-like growth factor-binding protein complex acid labile subunit OS=Homo sapiens OX=9606 GN=IGFALS PE=1 SV=1	ALS_HUMAN	IGFALS	66 kDa	Homo sapiens	0	0	0	0	0	0	0	0	0	0	0	0	0	2	4	20
294	F-box only protein 50 OS=Homo sapiens OX=9606 GN=NCCRP1 PE=1 SV=1	FBX50_HUMAN	NCCRP1	31 kDa	Homo sapiens	0	0	2	2	0	0	0	0	0	0	13	0	0	0	0	0
295	Protein POF1B OS=Homo sapiens OX=9606 GN=POF1B PE=1 SV=3	POF1B_HUMAN	POF1B	68 kDa	Homo sapiens	0	0	0	3	0	0	0	0	0	0	7	0	0	0	0	0
296	Keratin, type II cytoskeletal 79 OS=Homo sapiens OX=9606 GN=KRT79 PE=1 SV=2	K2C79_HUMAN	KRT79	58 kDa	Homo sapiens	0	0	0	0	0	0	0	0	0	0	137	0	0	0	0	0
297	Immunoglobulin lambda variable 10-54 OS=Homo sapiens OX=9606 GN=IGLV10-54 PE=3 SV=1	LVX54_HUMAN	IGLV10-54	12 kDa	Homo sapiens	0	0	0	0	0	0	0	0	0	0	0	5	0	0	0	0
298	Fructose-bisphosphate aldolase B OS=Homo sapiens OX=9606 GN=ALDOB PE=1 SV=2	ALDOB_HUMAN	ALDOB	39 kDa	Homo sapiens	0	0	0	0	0	0	0	0	0	13	0	0	0	0	2	0
299	Keratin, type I cytoskeletal 19 OS=Homo sapiens OX=9606 GN=KRT19 PE=1 SV=4	K1C19_HUMAN	KRT19	44 kDa	Homo sapiens	0	0	0	0	0	0	0	0	0	0	101	0	0	0	0	0
300	Serpin A12 OS=Homo sapiens OX=9606 GN=SERPINA12 PE=1 SV=1	SPA12_HUMAN	SERPINA12	47 kDa	Homo sapiens	0	0	0	0	0	0	0	0	0	0	15	0	0	0	0	0
301	Complement C1r subcomponent-like protein OS=Homo sapiens OX=9606 GN=C1RL PE=1 SV=2	C1RL_HUMAN	C1RL	53 kDa	Homo sapiens	0	0	0	0	0	0	0	0	0	0	0	0	0	0	0	13
302	Phospholipase B-like 1 OS=Homo sapiens OX=9606 GN=PLBD1 PE=1 SV=2	PLBL1_HUMAN	PLBD1	63 kDa	Homo sapiens	0	0	0	0	0	0	0	0	0	0	14	0	0	0	0	0
303	Glutathione S-transferase P OS=Homo sapiens OX=9606 GN=GSTP1 PE=1 SV=2	GSTP1_HUMAN	GSTP1	23 kDa	Homo sapiens	0	0	0	0	0	0	0	0	0	0	7	0	0	0	0	9
304	Kininogen-1 OS=Homo sapiens OX=9606 GN=KNG1 PE=1 SV=2	KNG1_HUMAN	KNG1	72 kDa	Homo sapiens	0	0	0	0	0	7	0	0	0	0	0	0	0	7	0	0
305	Leukocyte elastase inhibitor OS=Homo sapiens OX=9606 GN=SERPINB1 PE=1 SV=1	ILEU_HUMAN	SERPINB1	43 kDa	Homo sapiens	0	0	0	0	0	0	0	0	0	0	16	0	0	0	0	6
306	Mannosyl-oligosaccharide 1,2-alpha-mannosidase IA OS=Homo sapiens OX=9606 GN=MAN1A1 PE=1 SV=3	MA1A1_HUMAN	MAN1A1	73 kDa	Homo sapiens	0	0	0	0	0	0	0	0	0	0	0	0	0	0	0	7
307	Immunoglobulin lambda variable 5-52 OS=Homo sapiens OX=9606 GN=IGLV5-52 PE=3 SV=1	LV552_HUMAN	IGLV5-52	13 kDa	Homo sapiens	2	0	0	0	0	0	0	0	0	0	0	7	0	0	0	0
308	Apolipoprotein C-I OS=Homo sapiens OX=9606 GN=APOC1 PE=1 SV=1	APOC1_HUMAN	APOC1	9 kDa	Homo sapiens	0	0	0	0	0	0	0	0	0	0	0	0	0	4	7	7
309	4-trimethylaminobutyraldehyde dehydrogenase OS=Homo sapiens OX=9606 GN=ALDH9A1 PE=1 SV=3	AL9A1_HUMAN	ALDH9A1	54 kDa	Homo sapiens	0	0	0	0	0	0	0	0	0	0	11	0	0	0	0	0
310	Histone H1.2 OS=Homo sapiens OX=9606 GN=HIST1H1C PE=1 SV=2	H12_HUMAN	HIST1H1C	21 kDa	Homo sapiens	0	0	0	0	0	0	0	0	0	0	17	0	0	0	0	0
311	FH1/FH2 domain-containing protein 1 OS=Homo sapiens OX=9606 GN=FHOD1 PE=1 SV=3	FHOD1_HUMAN	FHOD1	127 kDa	Homo sapiens	0	0	0	0	2	0	0	0	0	0	0	0	0	0	0	0
312	Cornifin-B OS=Homo sapiens OX=9606 GN=SPRR1B PE=1 SV=2	SPR1B_HUMAN	SPRR1B	10 kDa	Homo sapiens	0	0	0	0	0	0	0	0	0	0	5	0	0	0	0	0
313	Fermitin family homolog 3 OS=Homo sapiens OX=9606 GN=FERMT3 PE=1 SV=1	URP2_HUMAN	FERMT3	76 kDa	Homo sapiens	0	0	0	0	0	0	0	0	0	0	0	0	0	0	0	10
314	Putative elongation factor 1-alpha-like 3 OS=Homo sapiens OX=9606 GN=EEF1A1P5 PE=5 SV=1	EF1A3_HUMAN	EEF1A1P5	50 kDa	Homo sapiens	0	0	0	0	0	0	0	0	0	0	10	0	0	0	0	0
315	Keratin, type I cytoskeletal 27 OS=Homo sapiens OX=9606 GN=KRT27 PE=1 SV=2	K1C27_HUMAN	KRT27	50 kDa	Homo sapiens	16	0	0	0	0	0	0	0	0	0	0	0	0	0	0	0
316	Keratin, type II cytoskeletal 6C OS=Homo sapiens OX=9606 GN=KRT6C PE=1 SV=3	K2C6C_HUMAN	KRT6C	60 kDa	Homo sapiens	0	0	0	0	0	0	0	0	0	0	338	0	0	0	0	0
317	Rab GDP dissociation inhibitor beta OS=Homo sapiens OX=9606 GN=GDI2 PE=1 SV=2	GDIB_HUMAN	GDI2	51 kDa	Homo sapiens	0	0	0	0	0	0	0	0	0	0	4	0	0	0	2	0
318	Clusterin OS=Homo sapiens OX=9606 GN=CLU PE=1 SV=1	CLUS_HUMAN	CLU	52 kDa	Homo sapiens	0	0	0	0	0	0	0	0	0	0	0	0	0	6	0	0
319	Immunoglobulin heavy variable 1-69-2 OS=Homo sapiens OX=9606 GN=IGHV1-69-2 PE=3 SV=2	HV692_HUMAN	IGHV1-69-2	13 kDa	Homo sapiens	0	0	0	0	0	0	0	0	0	0	0	0	0	0	6	0
320	L-lactate dehydrogenase A chain OS=Homo sapiens OX=9606 GN=LDHA PE=1 SV=2	LDHA_HUMAN	LDHA	37 kDa	Homo sapiens	0	0	0	0	0	0	0	0	0	0	12	0	0	0	0	0
321	Elongation factor 2 OS=Homo sapiens OX=9606 GN=EEF2 PE=1 SV=4	EF2_HUMAN	EEF2	95 kDa	Homo sapiens	0	0	0	0	0	0	0	0	0	0	10	0	0	0	0	0
322	Keratin, type II cuticular Hb4 OS=Homo sapiens OX=9606 GN=KRT84 PE=2 SV=2	KRT84_HUMAN	KRT84	65 kDa	Homo sapiens	21	0	0	0	13	0	0	0	0	0	0	0	0	0	0	0
323	Proteasome subunit beta type-5 OS=Homo sapiens OX=9606 GN=PSMB5 PE=1 SV=3	PSB5_HUMAN	PSMB5	28 kDa	Homo sapiens	0	0	0	0	0	0	0	0	0	0	18	0	0	0	0	0
324	Apolipoprotein A-II OS=Homo sapiens OX=9606 GN=APOA2 PE=1 SV=1	APOA2_HUMAN	APOA2	11 kDa	Homo sapiens	0	0	0	0	0	0	0	0	0	0	0	0	0	0	6	4
325	Inter-alpha-trypsin inhibitor heavy chain H2 OS=Homo sapiens OX=9606 GN=ITIH2 PE=1 SV=2	ITIH2_HUMAN	ITIH2	106 kDa	Homo sapiens	0	0	0	0	0	0	0	0	0	0	0	0	0	8	0	0
326	Immunoglobulin J chain OS=Homo sapiens OX=9606 GN=JCHAIN PE=1 SV=4	IGJ_HUMAN	JCHAIN	18 kDa	Homo sapiens	0	0	0	0	0	0	0	0	0	0	0	0	0	0	3	6
327	Peptidoglycan recognition protein 1 OS=Homo sapiens OX=9606 GN=PGLYRP1 PE=1 SV=1	PGRP1_HUMAN	PGLYRP1	22 kDa	Homo sapiens	0	0	0	0	0	4	0	0	0	2	0	0	0	0	0	0
328	6-phosphogluconate dehydrogenase, decarboxylating OS=Homo sapiens OX=9606 GN=PGD PE=1 SV=3	6PGD_HUMAN	PGD	53 kDa	Homo sapiens	0	0	0	0	0	0	0	0	0	0	6	0	0	0	3	3
329	Phosphoglucomutase-1 OS=Homo sapiens OX=9606 GN=PGM1 PE=1 SV=3	PGM1_HUMAN	PGM1	61 kDa	Homo sapiens	0	0	0	0	0	0	0	0	0	0	9	0	0	0	0	0
330	Ribonuclease 7 OS=Homo sapiens OX=9606 GN=RNASE7 PE=1 SV=2	RNAS7_HUMAN	RNASE7	17 kDa	Homo sapiens	0	0	0	0	0	0	0	0	0	0	10	0	0	0	0	0
331	Apolipoprotein A-IV OS=Homo sapiens OX=9606 GN=APOA4 PE=1 SV=3	APOA4_HUMAN	APOA4	45 kDa	Homo sapiens	0	0	0	0	0	0	0	0	0	0	0	0	0	8	0	0
332	Heat shock cognate 71 kDa protein OS=Homo sapiens OX=9606 GN=HSPA8 PE=1 SV=1	HSP7C_HUMAN	HSPA8	71 kDa	Homo sapiens	0	0	0	0	0	0	0	0	0	0	9	0	0	0	0	0
333	Malate dehydrogenase, mitochondrial OS=Homo sapiens OX=9606 GN=MDH2 PE=1 SV=3	MDHM_HUMAN	MDH2	36 kDa	Homo sapiens	0	0	0	0	0	0	0	0	0	0	12	0	0	0	0	0
334	Short-chain dehydrogenase/reductase family 9C member 7 OS=Homo sapiens OX=9606 GN=SDR9C7 PE=1 SV=1	DR9C7_HUMAN	SDR9C7	35 kDa	Homo sapiens	0	0	0	0	0	0	0	0	0	0	10	0	0	0	0	0
335	Proteasome subunit beta type-1 OS=Homo sapiens OX=9606 GN=PSMB1 PE=1 SV=2	PSB1_HUMAN	PSMB1	26 kDa	Homo sapiens	0	0	0	0	0	0	0	0	0	0	8	0	0	0	0	0
336	Immunoglobulin heavy constant epsilon OS=Homo sapiens OX=9606 GN=IGHE PE=1 SV=1	IGHE_HUMAN	IGHE	47 kDa	Homo sapiens	0	7	0	0	0	0	0	0	0	3	0	0	0	0	0	0
337	Fumarylacetoacetase OS=Homo sapiens OX=9606 GN=FAH PE=1 SV=2	FAAA_HUMAN	FAH	46 kDa	Homo sapiens	0	0	0	0	0	0	0	0	0	0	2	0	0	0	2	0
338	Nucleoside diphosphate kinase B OS=Homo sapiens OX=9606 GN=NME2 PE=1 SV=1	NDKB_HUMAN	NME2	17 kDa	Homo sapiens	0	0	0	0	0	0	0	0	0	0	3	0	0	0	3	2
339	Multimerin-2 OS=Homo sapiens OX=9606 GN=MMRN2 PE=1 SV=2	MMRN2_HUMAN	MMRN2	104 kDa	Homo sapiens	0	0	0	0	0	0	0	0	0	0	0	0	0	3	0	4
340	Zymogen granule protein 16 homolog B OS=Homo sapiens OX=9606 GN=ZG16B PE=1 SV=3	ZG16B_HUMAN	ZG16B	23 kDa	Homo sapiens	4	0	0	0	0	0	0	0	0	0	4	0	0	0	0	0
341	Serum paraoxonase/arylesterase 1 OS=Homo sapiens OX=9606 GN=PON1 PE=1 SV=3	PON1_HUMAN	PON1	40 kDa	Homo sapiens	0	0	0	0	0	0	0	0	0	0	0	0	0	7	0	0
342	Thrombospondin-1 OS=Homo sapiens OX=9606 GN=THBS1 PE=1 SV=2	TSP1_HUMAN	THBS1	129 kDa	Homo sapiens	0	0	0	0	0	0	0	0	0	0	0	0	0	0	0	7
343	Endoplasmic reticulum chaperone BiP OS=Homo sapiens OX=9606 GN=HSPA5 PE=1 SV=2	BIP_HUMAN	HSPA5	72 kDa	Homo sapiens	0	0	0	0	0	0	0	0	0	0	11	0	0	0	0	0
344	Ribonuclease 4 OS=Homo sapiens OX=9606 GN=RNASE4 PE=1 SV=3	RNAS4_HUMAN	RNASE4	17 kDa	Homo sapiens	0	0	0	0	0	0	2	0	0	2	0	0	0	0	0	0
345	Carboxypeptidase A4 OS=Homo sapiens OX=9606 GN=CPA4 PE=1 SV=2	CBPA4_HUMAN	CPA4	47 kDa	Homo sapiens	0	0	0	0	0	0	0	0	0	0	4	0	0	0	0	0
346	Angiotensinogen OS=Homo sapiens OX=9606 GN=AGT PE=1 SV=1	ANGT_HUMAN	AGT	53 kDa	Homo sapiens	0	0	0	0	0	0	0	0	0	0	0	0	0	11	0	0
347	Leucine-rich alpha-2-glycoprotein OS=Homo sapiens OX=9606 GN=LRG1 PE=1 SV=2	A2GL_HUMAN	LRG1	38 kDa	Homo sapiens	0	0	0	0	0	0	0	0	0	0	0	0	0	5	3	2
348	Haptoglobin-related protein OS=Homo sapiens OX=9606 GN=HPR PE=2 SV=2	HPTR_HUMAN	HPR	39 kDa	Homo sapiens	0	0	0	0	0	0	0	0	0	0	0	0	0	0	0	19
349	Prothrombin OS=Homo sapiens OX=9606 GN=F2 PE=1 SV=2	THRB_HUMAN	F2	70 kDa	Homo sapiens	0	0	0	0	0	6	0	0	0	0	0	0	0	4	0	0
350	Cystatin-SN OS=Homo sapiens OX=9606 GN=CST1 PE=1 SV=3	CYTN_HUMAN	CST1	16 kDa	Homo sapiens	5	0	0	0	0	0	0	0	0	0	2	0	0	0	0	0
351	Beta-hexosaminidase subunit beta OS=Homo sapiens OX=9606 GN=HEXB PE=1 SV=3	HEXB_HUMAN	HEXB	63 kDa	Homo sapiens	0	0	0	0	0	0	0	0	0	0	6	0	0	0	0	0
352	Plasma protease C1 inhibitor OS=Homo sapiens OX=9606 GN=SERPING1 PE=1 SV=2	IC1_HUMAN	SERPING1	55 kDa	Homo sapiens	0	0	0	0	0	0	0	0	0	0	0	0	0	13	0	0
353	Proactivator polypeptide-like 1 OS=Homo sapiens OX=9606 GN=PSAPL1 PE=2 SV=2	SAPL1_HUMAN	PSAPL1	57 kDa	Homo sapiens	0	0	0	0	0	0	0	0	0	0	3	0	0	0	0	0
354	Transaldolase OS=Homo sapiens OX=9606 GN=TALDO1 PE=1 SV=2	TALDO_HUMAN	TALDO1	38 kDa	Homo sapiens	0	0	0	0	0	0	0	0	0	0	5	0	0	0	0	0
355	Ficolin-3 OS=Homo sapiens OX=9606 GN=FCN3 PE=1 SV=2	FCN3_HUMAN	FCN3	33 kDa	Homo sapiens	0	0	0	0	0	0	0	0	0	0	0	0	0	0	0	6
356	Histone H2B type 1-D OS=Homo sapiens OX=9606 GN=HIST1H2BD PE=1 SV=2	H2B1D_HUMAN	HIST1H2BD	14 kDa	Homo sapiens	0	0	0	0	0	0	0	0	0	0	3	0	0	0	0	0
357	Protein AMBP OS=Homo sapiens OX=9606 GN=AMBP PE=1 SV=1	AMBP_HUMAN	AMBP	39 kDa	Homo sapiens	0	0	0	0	0	0	0	0	0	0	0	0	0	10	0	0
358	Vasodilator-stimulated phosphoprotein OS=Homo sapiens OX=9606 GN=VASP PE=1 SV=3	VASP_HUMAN	VASP	40 kDa	Homo sapiens	0	0	0	0	0	0	0	0	0	0	0	0	0	0	3	8
359	Histone H4 OS=Homo sapiens OX=9606 GN=HIST1H4A PE=1 SV=2	H4_HUMAN	HIST1H4A	11 kDa	Homo sapiens	0	0	0	0	0	0	0	0	0	0	9	0	0	0	0	0
360	Copine-3 OS=Homo sapiens OX=9606 GN=CPNE3 PE=1 SV=1	CPNE3_HUMAN	CPNE3	60 kDa	Homo sapiens	0	0	0	0	0	0	0	0	0	0	7	0	0	0	0	0
361	Histone H1.5 OS=Homo sapiens OX=9606 GN=HIST1H1B PE=1 SV=3	H15_HUMAN	HIST1H1B	23 kDa	Homo sapiens	0	0	0	0	0	0	0	0	0	0	10	0	0	0	0	0
362	Keratin, type II cytoskeletal 71 OS=Homo sapiens OX=9606 GN=KRT71 PE=1 SV=3	K2C71_HUMAN	KRT71	57 kDa	Homo sapiens	19	0	0	0	0	0	0	0	0	0	0	0	0	0	0	0
363	Selenoprotein P OS=Homo sapiens OX=9606 GN=SELENOP PE=1 SV=3	SEPP1_HUMAN	SELENOP	43 kDa	Homo sapiens	0	0	0	0	0	0	0	0	0	0	0	0	0	0	3	5
364	Serpin B7 OS=Homo sapiens OX=9606 GN=SERPINB7 PE=1 SV=1	SPB7_HUMAN	SERPINB7	43 kDa	Homo sapiens	0	0	0	0	0	0	0	0	0	0	8	0	0	0	0	0
365	Sulfhydryl oxidase 1 OS=Homo sapiens OX=9606 GN=QSOX1 PE=1 SV=3	QSOX1_HUMAN	QSOX1	83 kDa	Homo sapiens	0	0	0	0	0	0	0	0	0	0	0	0	0	0	4	6
366	Inter-alpha-trypsin inhibitor heavy chain H1 OS=Homo sapiens OX=9606 GN=ITIH1 PE=1 SV=3	ITIH1_HUMAN	ITIH1	101 kDa	Homo sapiens	0	0	0	0	0	0	0	0	0	0	0	0	0	8	0	0
367	DNA-(apurinic or apyrimidinic site) lyase OS=Homo sapiens OX=9606 GN=APEX1 PE=1 SV=2	APEX1_HUMAN	APEX1	36 kDa	Homo sapiens	0	0	0	0	0	0	0	0	0	0	5	0	0	0	0	0
368	Cystatin-B OS=Homo sapiens OX=9606 GN=CSTB PE=1 SV=2	CYTB_HUMAN	CSTB	11 kDa	Homo sapiens	0	0	0	0	0	0	0	0	0	0	6	0	0	0	0	0
369	Hemoglobin subunit delta OS=Homo sapiens OX=9606 GN=HBD PE=1 SV=2	HBD_HUMAN	HBD	16 kDa	Homo sapiens	0	0	0	0	0	0	0	0	0	0	0	0	0	0	0	20
370	Malate dehydrogenase, cytoplasmic OS=Homo sapiens OX=9606 GN=MDH1 PE=1 SV=4	MDHC_HUMAN	MDH1	36 kDa	Homo sapiens	0	0	0	0	0	0	0	0	0	0	5	0	0	0	0	0
371	Alpha-2-HS-glycoprotein OS=Homo sapiens OX=9606 GN=AHSG PE=1 SV=2	FETUA_HUMAN	AHSG	39 kDa	Homo sapiens	0	0	0	0	0	0	0	0	0	0	0	0	0	8	0	0
372	Kallikrein-7 OS=Homo sapiens OX=9606 GN=KLK7 PE=1 SV=1	KLK7_HUMAN	KLK7	28 kDa	Homo sapiens	0	0	0	0	0	0	0	0	0	0	4	0	0	0	0	0
373	Cytidine deaminase OS=Homo sapiens OX=9606 GN=CDA PE=1 SV=2	CDD_HUMAN	CDA	16 kDa	Homo sapiens	0	0	0	0	0	0	0	0	0	0	6	0	0	0	0	0
374	Cornulin OS=Homo sapiens OX=9606 GN=CRNN PE=1 SV=1	CRNN_HUMAN	CRNN	54 kDa	Homo sapiens	4	0	0	0	0	0	0	0	0	0	4	0	0	0	0	0
375	Actin, alpha cardiac muscle 1 OS=Homo sapiens OX=9606 GN=ACTC1 PE=1 SV=1	ACTC_HUMAN	ACTC1	42 kDa	Homo sapiens	0	0	0	0	0	0	0	0	0	0	13	0	0	0	0	6
376	Calpain-1 catalytic subunit OS=Homo sapiens OX=9606 GN=CAPN1 PE=1 SV=1	CAN1_HUMAN	CAPN1	82 kDa	Homo sapiens	0	0	0	0	0	0	0	0	0	0	5	0	0	0	0	0
377	Keratin, type II cytoskeletal 8 OS=Homo sapiens OX=9606 GN=KRT8 PE=1 SV=7	K2C8_HUMAN	KRT8	54 kDa	Homo sapiens	0	0	0	0	0	0	0	0	0	0	119	0	0	0	0	0
378	NPC intracellular cholesterol transporter 2 OS=Homo sapiens OX=9606 GN=NPC2 PE=1 SV=1	NPC2_HUMAN	NPC2	17 kDa	Homo sapiens	0	0	0	0	0	0	0	0	0	0	3	0	0	0	0	0
379	Proteasome subunit alpha type-4 OS=Homo sapiens OX=9606 GN=PSMA4 PE=1 SV=1	PSA4_HUMAN	PSMA4	29 kDa	Homo sapiens	0	0	0	0	0	0	0	0	0	0	9	0	0	0	0	0
380	Histidine--tRNA ligase, cytoplasmic OS=Homo sapiens OX=9606 GN=HARS PE=1 SV=2	SYHC_HUMAN	HARS	57 kDa	Homo sapiens	0	0	0	0	0	0	0	0	0	0	7	0	0	0	0	0
381	Inositol monophosphatase 2 OS=Homo sapiens OX=9606 GN=IMPA2 PE=1 SV=1	IMPA2_HUMAN	IMPA2	31 kDa	Homo sapiens	0	0	0	0	0	0	0	0	0	0	6	0	0	0	0	0
382	Protein broad-minded OS=Homo sapiens OX=9606 GN=TBC1D32 PE=2 SV=4	BROMI_HUMAN	TBC1D32	145 kDa	Homo sapiens	0	0	0	0	0	0	0	0	0	0	0	0	0	2	0	0
383	Histone H2A type 1-D OS=Homo sapiens OX=9606 GN=HIST1H2AD PE=1 SV=2	H2A1D_HUMAN (+6)	HIST1H2AD	14 kDa	Homo sapiens	0	0	0	0	0	0	0	0	0	0	6	0	0	0	0	0
384	Pregnancy zone protein OS=Homo sapiens OX=9606 GN=PZP PE=1 SV=4	PZP_HUMAN	PZP	164 kDa	Homo sapiens	0	0	0	0	0	0	0	0	0	0	0	0	0	65	0	0
385	Alpha-2-macroglobulin-like protein 1 OS=Homo sapiens OX=9606 GN=A2ML1 PE=1 SV=3	A2ML1_HUMAN	A2ML1	161 kDa	Homo sapiens	0	0	0	0	0	0	0	0	0	0	7	0	0	0	0	0
386	Tubulin alpha-1C chain OS=Homo sapiens OX=9606 GN=TUBA1C PE=1 SV=1	TBA1C_HUMAN	TUBA1C	50 kDa	Homo sapiens	0	0	0	0	0	0	0	0	0	0	5	0	0	0	0	0
387	Proteasome subunit alpha type-7 OS=Homo sapiens OX=9606 GN=PSMA7 PE=1 SV=1	PSA7_HUMAN	PSMA7	28 kDa	Homo sapiens	0	0	0	0	0	0	0	0	0	0	10	0	0	0	0	0
388	Adenylate kinase isoenzyme 1 OS=Homo sapiens OX=9606 GN=AK1 PE=1 SV=3	KAD1_HUMAN	AK1	22 kDa	Homo sapiens	0	0	0	0	0	0	0	0	0	0	0	2	0	0	0	0
389	Platelet glycoprotein V OS=Homo sapiens OX=9606 GN=GP5 PE=1 SV=1	GPV_HUMAN	GP5	61 kDa	Homo sapiens	0	0	0	0	0	0	0	0	0	0	0	0	0	0	2	3
390	C4b-binding protein beta chain OS=Homo sapiens OX=9606 GN=C4BPB PE=1 SV=1	C4BPB_HUMAN	C4BPB	28 kDa	Homo sapiens	0	0	0	0	0	0	0	0	0	0	0	0	0	0	0	3
391	Actin-related protein 3 OS=Homo sapiens OX=9606 GN=ACTR3 PE=1 SV=3	ARP3_HUMAN	ACTR3	47 kDa	Homo sapiens	0	0	0	0	0	0	0	0	0	0	0	0	0	0	4	6
392	von Willebrand factor OS=Homo sapiens OX=9606 GN=VWF PE=1 SV=4	VWF_HUMAN	VWF	309 kDa	Homo sapiens	0	0	0	0	0	0	0	0	0	0	0	0	0	0	4	0
393	N-fatty-acyl-amino acid synthase/hydrolase PM20D1 OS=Homo sapiens OX=9606 GN=PM20D1 PE=2 SV=3	P20D1_HUMAN	PM20D1	56 kDa	Homo sapiens	0	0	0	0	0	0	0	0	0	0	0	0	0	0	0	4
394	Acid ceramidase OS=Homo sapiens OX=9606 GN=ASAH1 PE=1 SV=5	ASAH1_HUMAN	ASAH1	45 kDa	Homo sapiens	0	0	0	0	0	0	0	0	0	0	5	0	0	0	0	0
395	Glutathione synthetase OS=Homo sapiens OX=9606 GN=GSS PE=1 SV=1	GSHB_HUMAN	GSS	52 kDa	Homo sapiens	0	0	0	0	0	0	0	0	0	0	4	0	0	0	0	0
396	Ester hydrolase C11orf54 OS=Homo sapiens OX=9606 GN=C11orf54 PE=1 SV=1	CK054_HUMAN	C11orf54	35 kDa	Homo sapiens	0	0	0	0	0	0	0	0	0	0	3	0	0	0	0	0
397	Alpha-1-acid glycoprotein 2 OS=Homo sapiens OX=9606 GN=ORM2 PE=1 SV=2	A1AG2_HUMAN	ORM2	24 kDa	Homo sapiens	0	0	0	0	0	0	0	0	0	0	0	0	0	9	0	0
398	Proteasome subunit alpha type-5 OS=Homo sapiens OX=9606 GN=PSMA5 PE=1 SV=3	PSA5_HUMAN	PSMA5	26 kDa	Homo sapiens	0	0	0	0	0	0	0	0	0	0	7	0	0	0	0	0
399	Apolipoprotein M OS=Homo sapiens OX=9606 GN=APOM PE=1 SV=2	APOM_HUMAN	APOM	21 kDa	Homo sapiens	0	0	0	0	0	0	0	0	0	0	0	0	0	0	5	0
400	Tripeptidyl-peptidase 1 OS=Homo sapiens OX=9606 GN=TPP1 PE=1 SV=2	TPP1_HUMAN	TPP1	61 kDa	Homo sapiens	0	0	0	0	0	0	0	0	0	0	4	0	0	0	0	0
401	Prelamin-A/C OS=Homo sapiens OX=9606 GN=LMNA PE=1 SV=1	LMNA_HUMAN	LMNA	74 kDa	Homo sapiens	0	0	0	0	0	0	0	0	0	0	3	0	0	0	0	0
402	Splicing factor 3A subunit 1 OS=Homo sapiens OX=9606 GN=SF3A1 PE=1 SV=1	SF3A1_HUMAN	SF3A1	89 kDa	Homo sapiens	0	0	0	0	0	0	0	0	0	0	0	0	0	0	0	2
403	Keratin, type I cytoskeletal 18 OS=Homo sapiens OX=9606 GN=KRT18 PE=1 SV=2	K1C18_HUMAN	KRT18	48 kDa	Homo sapiens	0	0	0	0	0	0	0	0	0	0	4	0	0	0	0	0
404	Alpha-1-acid glycoprotein 1 OS=Homo sapiens OX=9606 GN=ORM1 PE=1 SV=1	A1AG1_HUMAN	ORM1	24 kDa	Homo sapiens	0	0	0	0	0	0	0	0	0	0	0	0	0	14	0	0
405	Apolipoprotein L1 OS=Homo sapiens OX=9606 GN=APOL1 PE=1 SV=5	APOL1_HUMAN	APOL1	44 kDa	Homo sapiens	0	0	0	0	0	0	0	0	0	0	0	0	0	0	0	4
406	Prenylcysteine oxidase 1 OS=Homo sapiens OX=9606 GN=PCYOX1 PE=1 SV=3	PCYOX_HUMAN	PCYOX1	57 kDa	Homo sapiens	0	0	0	0	0	0	0	0	0	0	0	0	0	0	0	5
407	Serum amyloid A-1 protein OS=Homo sapiens OX=9606 GN=SAA1 PE=1 SV=1	SAA1_HUMAN	SAA1	14 kDa	Homo sapiens	0	0	0	0	0	0	0	0	0	4	0	0	0	0	0	0
408	p53 apoptosis effector related to PMP-22 OS=Homo sapiens OX=9606 GN=PERP PE=2 SV=1	PERP_HUMAN	PERP	21 kDa	Homo sapiens	0	0	0	0	0	0	0	0	0	0	5	0	0	0	0	0
409	Apolipoprotein C-IV OS=Homo sapiens OX=9606 GN=APOC4 PE=1 SV=1	APOC4_HUMAN	APOC4	15 kDa	Homo sapiens	0	0	0	0	0	0	0	0	0	0	0	0	0	0	4	0
410	Proteasome subunit alpha type-1 OS=Homo sapiens OX=9606 GN=PSMA1 PE=1 SV=1	PSA1_HUMAN	PSMA1	30 kDa	Homo sapiens	0	0	0	0	0	0	0	0	0	0	3	0	0	0	0	0
411	Interleukin-36 gamma OS=Homo sapiens OX=9606 GN=IL36G PE=1 SV=1	IL36G_HUMAN	IL36G	19 kDa	Homo sapiens	0	0	0	0	0	0	0	0	0	0	3	0	0	0	0	0
412	Homeobox protein TGIF1 OS=Homo sapiens OX=9606 GN=TGIF1 PE=1 SV=3	TGIF1_HUMAN	TGIF1	43 kDa	Homo sapiens	0	0	0	0	2	0	0	0	0	0	0	0	0	0	0	0
413	Actin-related protein 2/3 complex subunit 1B OS=Homo sapiens OX=9606 GN=ARPC1B PE=1 SV=3	ARC1B_HUMAN	ARPC1B	41 kDa	Homo sapiens	0	0	0	0	0	0	0	0	0	0	0	0	0	0	0	2
414	Heat shock 70 kDa protein 6 OS=Homo sapiens OX=9606 GN=HSPA6 PE=1 SV=2	HSP76_HUMAN	HSPA6	71 kDa	Homo sapiens	0	0	0	0	0	0	0	0	0	0	10	0	0	0	0	0
415	Ras-related protein Rab-1B OS=Homo sapiens OX=9606 GN=RAB1B PE=1 SV=1	RAB1B_HUMAN	RAB1B	22 kDa	Homo sapiens	0	0	0	0	0	0	0	0	0	0	5	0	0	0	0	0
416	Tropomyosin alpha-3 chain OS=Homo sapiens OX=9606 GN=TPM3 PE=1 SV=2	TPM3_HUMAN	TPM3	33 kDa	Homo sapiens	0	0	0	0	0	0	0	0	0	0	3	0	0	0	0	0
417	14-3-3 protein zeta/delta OS=Homo sapiens OX=9606 GN=YWHAZ PE=1 SV=1	1433Z_HUMAN	YWHAZ	28 kDa	Homo sapiens	0	0	0	0	0	0	0	0	0	0	5	0	0	0	0	0
418	Actin-related protein 2 OS=Homo sapiens OX=9606 GN=ACTR2 PE=1 SV=1	ARP2_HUMAN	ACTR2	45 kDa	Homo sapiens	0	0	0	0	0	0	0	0	0	0	0	0	0	0	3	3
419	Fatty acid-binding protein, adipocyte OS=Homo sapiens OX=9606 GN=FABP4 PE=1 SV=3	FABP4_HUMAN	FABP4	15 kDa	Homo sapiens	4	0	0	0	0	0	0	0	0	0	0	0	0	0	0	0
420	Macrophage migration inhibitory factor OS=Homo sapiens OX=9606 GN=MIF PE=1 SV=4	MIF_HUMAN	MIF	12 kDa	Homo sapiens	0	0	0	0	0	0	0	0	0	0	4	0	0	0	0	0
421	Proteasome subunit beta type-3 OS=Homo sapiens OX=9606 GN=PSMB3 PE=1 SV=2	PSB3_HUMAN	PSMB3	23 kDa	Homo sapiens	0	0	0	0	0	0	0	0	0	0	3	0	0	0	0	0
422	Lysophospholipase D GDPD3 OS=Homo sapiens OX=9606 GN=GDPD3 PE=2 SV=3	GDPD3_HUMAN	GDPD3	37 kDa	Homo sapiens	0	0	0	0	0	0	0	0	0	0	2	0	0	0	0	0
423	Purine nucleoside phosphorylase OS=Homo sapiens OX=9606 GN=PNP PE=1 SV=2	PNPH_HUMAN	PNP	32 kDa	Homo sapiens	0	0	0	0	0	0	0	0	0	0	7	0	0	0	0	0
424	Protein S100-A11 OS=Homo sapiens OX=9606 GN=S100A11 PE=1 SV=2	S10AB_HUMAN	S100A11	12 kDa	Homo sapiens	0	0	0	0	0	0	0	0	0	0	2	0	0	0	0	0
425	Plasminogen activator inhibitor 1 OS=Homo sapiens OX=9606 GN=SERPINE1 PE=1 SV=1	PAI1_HUMAN	SERPINE1	45 kDa	Homo sapiens	0	0	0	0	0	0	0	0	0	0	0	0	0	0	0	2
426	Leucine-rich repeat-containing protein 15 OS=Homo sapiens OX=9606 GN=LRRC15 PE=2 SV=2	LRC15_HUMAN	LRRC15	64 kDa	Homo sapiens	0	0	0	0	0	0	0	0	0	0	2	0	0	0	0	0
427	Proteasome subunit alpha type-3 OS=Homo sapiens OX=9606 GN=PSMA3 PE=1 SV=2	PSA3_HUMAN	PSMA3	28 kDa	Homo sapiens	0	0	0	0	0	0	0	0	0	0	5	0	0	0	0	0
428	Proteasome subunit beta type-4 OS=Homo sapiens OX=9606 GN=PSMB4 PE=1 SV=4	PSB4_HUMAN	PSMB4	29 kDa	Homo sapiens	0	0	0	0	0	0	0	0	0	0	4	0	0	0	0	0
429	WASH complex subunit 4 OS=Homo sapiens OX=9606 GN=WASHC4 PE=1 SV=2	WASC4_HUMAN	WASHC4	136 kDa	Homo sapiens	0	0	0	0	0	0	0	0	0	0	0	2	0	0	0	0
430	Myoglobin OS=Homo sapiens OX=9606 GN=MB PE=1 SV=2	MYG_HUMAN	MB	17 kDa	Homo sapiens	0	0	0	0	0	0	0	0	0	0	0	3	0	0	0	0
431	Lysosomal protective protein OS=Homo sapiens OX=9606 GN=CTSA PE=1 SV=2	PPGB_HUMAN	CTSA	54 kDa	Homo sapiens	0	0	0	0	0	0	0	0	0	0	3	0	0	0	0	0
432	Methanethiol oxidase OS=Homo sapiens OX=9606 GN=SELENBP1 PE=1 SV=2	SBP1_HUMAN	SELENBP1	52 kDa	Homo sapiens	0	0	0	0	0	0	0	0	0	0	4	0	0	0	0	0
433	SH3 domain-binding glutamic acid-rich-like protein OS=Homo sapiens OX=9606 GN=SH3BGRL PE=1 SV=1	SH3L1_HUMAN	SH3BGRL	13 kDa	Homo sapiens	0	0	0	0	0	0	0	0	0	0	4	0	0	0	0	0
434	Neutrophil defensin 3 OS=Homo sapiens OX=9606 GN=DEFA3 PE=1 SV=1	DEF3_HUMAN	DEFA3	10 kDa	Homo sapiens	0	0	0	0	0	0	0	0	0	0	6	0	0	0	0	0
435	Beta-glucuronidase OS=Homo sapiens OX=9606 GN=GUSB PE=1 SV=2	BGLR_HUMAN	GUSB	75 kDa	Homo sapiens	0	0	0	0	0	0	0	0	0	0	3	0	0	0	0	0
436	Protein S100-A4 OS=Homo sapiens OX=9606 GN=S100A4 PE=1 SV=1	S10A4_HUMAN	S100A4	12 kDa	Homo sapiens	0	0	0	0	0	0	0	0	0	0	3	0	0	0	0	0
437	Carbonic anhydrase 3 OS=Homo sapiens OX=9606 GN=CA3 PE=1 SV=3	CAH3_HUMAN	CA3	30 kDa	Homo sapiens	0	0	0	0	0	0	0	0	0	0	0	2	0	0	0	0
438	Lipocalin-1 OS=Homo sapiens OX=9606 GN=LCN1 PE=1 SV=1	LCN1_HUMAN	LCN1	19 kDa	Homo sapiens	0	0	0	0	0	0	0	0	0	0	2	0	0	0	0	0
439	Retinol-binding protein 4 OS=Homo sapiens OX=9606 GN=RBP4 PE=1 SV=3	RET4_HUMAN	RBP4	23 kDa	Homo sapiens	0	0	0	0	0	0	0	0	0	0	0	0	0	3	0	0
440	Superoxide dismutase [Mn], mitochondrial OS=Homo sapiens OX=9606 GN=SOD2 PE=1 SV=3	SODM_HUMAN	SOD2	25 kDa	Homo sapiens	0	0	0	0	0	0	0	0	0	0	2	0	0	0	0	0
441	L-lactate dehydrogenase B chain OS=Homo sapiens OX=9606 GN=LDHB PE=1 SV=2	LDHB_HUMAN	LDHB	37 kDa	Homo sapiens	0	0	0	0	0	0	0	0	0	0	4	0	0	0	0	0
442	Phosphoglucomutase-2 OS=Homo sapiens OX=9606 GN=PGM2 PE=1 SV=4	PGM2_HUMAN	PGM2	68 kDa	Homo sapiens	0	0	0	0	0	0	0	0	0	0	2	0	0	0	0	0
443	Acyl-CoA-binding protein OS=Homo sapiens OX=9606 GN=DBI PE=1 SV=2	ACBP_HUMAN	DBI	10 kDa	Homo sapiens	0	0	0	0	0	0	0	0	0	0	3	0	0	0	0	0
444	Keratin-associated protein 13-2 OS=Homo sapiens OX=9606 GN=KRTAP13-2 PE=1 SV=1	KR132_HUMAN	KRTAP13-2	19 kDa	Homo sapiens	0	0	3	0	0	0	0	0	0	0	0	0	0	0	0	0
445	Metallothionein-1X OS=Homo sapiens OX=9606 GN=MT1X PE=1 SV=1	MT1X_HUMAN	MT1X	6 kDa	Homo sapiens	0	0	0	0	0	0	0	0	0	0	3	0	0	0	0	0
446	Adenosylhomocysteinase OS=Homo sapiens OX=9606 GN=AHCY PE=1 SV=4	SAHH_HUMAN	AHCY	48 kDa	Homo sapiens	0	0	0	0	0	0	0	0	0	0	2	0	0	0	0	0
447	Ras-related protein Rab-7a OS=Homo sapiens OX=9606 GN=RAB7A PE=1 SV=1	RAB7A_HUMAN	RAB7A	23 kDa	Homo sapiens	0	0	0	0	0	0	0	0	0	0	2	0	0	0	0	0
448	Afamin OS=Homo sapiens OX=9606 GN=AFM PE=1 SV=1	AFAM_HUMAN	AFM	69 kDa	Homo sapiens	0	0	0	0	0	0	0	0	0	0	0	0	0	3	0	0
449	Serum amyloid P-component OS=Homo sapiens OX=9606 GN=APCS PE=1 SV=2	SAMP_HUMAN	APCS	25 kDa	Homo sapiens	0	0	0	0	0	0	0	0	0	0	0	0	0	3	0	0
450	Tubulin beta-4B chain OS=Homo sapiens OX=9606 GN=TUBB4B PE=1 SV=1	TBB4B_HUMAN	TUBB4B	50 kDa	Homo sapiens	0	0	0	0	0	0	0	0	0	0	2	0	0	0	0	0
451	Resistin OS=Homo sapiens OX=9606 GN=RETN PE=1 SV=1	RETN_HUMAN	RETN	11 kDa	Homo sapiens	0	0	0	0	0	0	0	0	0	0	2	0	0	0	0	0
END OF FILE
