# Supplementary material for: Phenotype and Neuronal Cytotoxic Function of Glioblastoma Extracellular Vesicles
Source: Biomedicines. 2022 Oct 27;10(11):2718. doi: 10.3390/biomedicines10112718 (PMC9688005; doi:10.3390/biomedicines10112718)
Supplement: Supplementary file 1 [file biomedicines-10-02718-s001.zip › biomedicines-1930407 Table S5 IPA comparison analysis all 4 EV samples full table.xls]

## Sheet: Table S5  IPA comparison analys
Table S5: IPA comparison analysis all 4 EV samples full table
© 2000-2022 QIAGEN. All rights reserved.
Diseases and Bio Functions	GBM Observation 1	GBM Observation 2	GBM Observation 3	GBM Observation 4	HC Observation 1	HC Observation 2	HC Observation 3	HC Observation 4	MMA Observation 1	MMA Observation 2	MMA Observation 3	MMA Observation 4	MET Observation 1	MET Observation 2	MET Observation 3	MET Observation 4
Severe COVID-19	48.8477	48.8477	48.8477	48.8477	45.5757	45.5757	45.5757	45.5757	48.6295	48.6295	48.6295	48.6295	53.4183	53.4183	53.4183	53.4183
Blood clot	42.1425	42.1425	42.1425	42.1425	43.6049	43.6049	43.6049	43.6049	43.1572	43.1572	43.1572	43.1572	45.83	45.83	45.83	45.83
Thrombus	37.475	37.475	37.475	37.475	39.9461	39.9461	39.9461	39.9461	38.4898	38.4898	38.4898	38.4898	41.2052	41.2052	41.2052	41.2052
Complement activation	36.4705	36.4705	36.4705	36.4705	37.8971	37.8971	37.8971	37.8971	40.1123	40.1123	40.1123	40.1123	39.5356	39.5356	39.5356	39.5356
COVID-19	40.6276	40.6276	40.6276	40.6276	34.6289	34.6289	34.6289	34.6289	38.3099	38.3099	38.3099	38.3099	40.0643	40.0643	40.0643	40.0643
Hemostasis	33.7354	33.7354	33.7354	33.7354	31.5204	31.5204	31.5204	31.5204	34.6637	34.6637	34.6637	34.6637	37.1235	37.1235	37.1235	37.1235
Vaso-occlusion	32.3073	32.3073	32.3073	32.3073	27.2559	27.2559	27.2559	27.2559	30.2719	30.2719	30.2719	30.2719	34.4017	34.4017	34.4017	34.4017
Coagulation	29.6535	29.6535	29.6535	29.6535	29.2689	29.2689	29.2689	29.2689	30.6482	30.6482	30.6482	30.6482	32.1934	32.1934	32.1934	32.1934
Coagulation of blood	29.1463	29.1463	29.1463	29.1463	28.7016	28.7016	28.7016	28.7016	30.1504	30.1504	30.1504	30.1504	31.726	31.726	31.726	31.726
Binding of blood cells	28.5313	28.5313	28.5313	28.5313	29.3287	29.3287	29.3287	29.3287	29.2207	29.2207	29.2207	29.2207	31.8455	31.8455	31.8455	31.8455
Occlusion of blood vessel	30.754	30.754	30.754	30.754	25.7118	25.7118	25.7118	25.7118	28.7552	28.7552	28.7552	28.7552	32.8528	32.8528	32.8528	32.8528
Aggregation of cells	29.4747	29.4747	29.4747	29.4747	26.8997	26.8997	26.8997	26.8997	27.327	27.327	27.327	27.327	31.263	31.263	31.263	31.263
Infection by coronavirus	40.6698	40.6698	40.6698	40.6698	34.9101	34.9101	34.9101	34.9101	0	0	0	0	39.0576	39.0576	39.0576	39.0576
Aggregation of blood cells	28.2869	28.2869	28.2869	28.2869	27.1989	27.1989	27.1989	27.1989	28.1075	28.1075	28.1075	28.1075	30.4271	30.4271	30.4271	30.4271
Amyloidosis	27.0661	27.0661	27.0661	27.0661	27.5725	27.5725	27.5725	27.5725	28.4392	28.4392	28.4392	28.4392	28.8747	28.8747	28.8747	28.8747
Occlusion of artery	28.5452	28.5452	28.5452	28.5452	22.6774	22.6774	22.6774	22.6774	26.599	26.599	26.599	26.599	30.6531	30.6531	30.6531	30.6531
Adhesion of blood cells	25.6169	25.6169	25.6169	25.6169	26.1126	26.1126	26.1126	26.1126	26.3282	26.3282	26.3282	26.3282	29.0644	29.0644	29.0644	29.0644
Inflammation of organ	25.5162	25.5162	25.5162	25.5162	25.531	25.531	25.531	25.531	23.9325	23.9325	23.9325	23.9325	31.5703	31.5703	31.5703	31.5703
Aggregation of blood platelets	26.6199	26.6199	26.6199	26.6199	25.1851	25.1851	25.1851	25.1851	26.4603	26.4603	26.4603	26.4603	27.8924	27.8924	27.8924	27.8924
Tauopathy	25.5574	25.5574	25.5574	25.5574	26.8218	26.8218	26.8218	26.8218	26.109	26.109	26.109	26.109	26.5672	26.5672	26.5672	26.5672
Dementia	25.1011	25.1011	25.1011	25.1011	27.3004	27.3004	27.3004	27.3004	26.4023	26.4023	26.4023	26.4023	26.0123	26.0123	26.0123	26.0123
Migration of blood cells	24.7989	24.7989	24.7989	24.7989	21.907	21.907	21.907	21.907	25.8922	25.8922	25.8922	25.8922	28.0011	28.0011	28.0011	28.0011
Immune mediated inflammatory disease	25.9352	25.9352	25.9352	25.9352	21.4888	21.4888	21.4888	21.4888	21.8523	21.8523	21.8523	21.8523	31.2063	31.2063	31.2063	31.2063
Infarction	24.6673	24.6673	24.6673	24.6673	24.2737	24.2737	24.2737	24.2737	24.4722	24.4722	24.4722	24.4722	26.2116	26.2116	26.2116	26.2116
Leukocyte migration	24.1777	24.1777	24.1777	24.1777	21.2834	21.2834	21.2834	21.2834	25.2638	25.2638	25.2638	25.2638	27.3666	27.3666	27.3666	27.3666
Alzheimer disease	23.2205	23.2205	23.2205	23.2205	25.0716	25.0716	25.0716	25.0716	25.3695	25.3695	25.3695	25.3695	24.3167	24.3167	24.3167	24.3167
Arteriosclerosis	25.6241	25.6241	25.6241	25.6241	21.122	21.122	21.122	21.122	23.7095	23.7095	23.7095	23.7095	27.028	27.028	27.028	27.028
Infection by RNA virus	25.1832	25.1832	25.1832	25.1832	23.434	23.434	23.434	23.434	22.9148	22.9148	22.9148	22.9148	25.4042	25.4042	25.4042	25.4042
Binding of leukocytes	23.0018	23.0018	23.0018	23.0018	24.3038	24.3038	24.3038	24.3038	23.6964	23.6964	23.6964	23.6964	25.4815	25.4815	25.4815	25.4815
Adhesion of immune cells	22.7055	22.7055	22.7055	22.7055	23.9039	23.9039	23.9039	23.9039	23.4228	23.4228	23.4228	23.4228	25.2899	25.2899	25.2899	25.2899
Atherosclerosis	25.0114	25.0114	25.0114	25.0114	20.4963	20.4963	20.4963	20.4963	23.1105	23.1105	23.1105	23.1105	26.4279	26.4279	26.4279	26.4279
Cell movement of myeloid cells	23.3694	23.3694	23.3694	23.3694	20.6483	20.6483	20.6483	20.6483	25.4512	25.4512	25.4512	25.4512	25.1177	25.1177	25.1177	25.1177
Binding of myeloid cells	22.2846	22.2846	22.2846	22.2846	23.9986	23.9986	23.9986	23.9986	22.1438	22.1438	22.1438	22.1438	24.5842	24.5842	24.5842	24.5842
Progressive encephalopathy	21.1699	21.1699	21.1699	21.1699	22.9705	22.9705	22.9705	22.9705	21.5606	21.5606	21.5606	21.5606	22.953	22.953	22.953	22.953
Cell movement of leukocytes	21.4263	21.4263	21.4263	21.4263	19.6016	19.6016	19.6016	19.6016	23.206	23.206	23.206	23.206	24.037	24.037	24.037	24.037
Cell movement of phagocytes	20.357	20.357	20.357	20.357	19.1203	19.1203	19.1203	19.1203	23.0991	23.0991	23.0991	23.0991	24.3094	24.3094	24.3094	24.3094
Cell movement of granulocytes	22.1182	22.1182	22.1182	22.1182	19.1685	19.1685	19.1685	19.1685	21.9343	21.9343	21.9343	21.9343	23.6007	23.6007	23.6007	23.6007
Cell movement of neutrophils	21.2695	21.2695	21.2695	21.2695	18.7863	18.7863	18.7863	18.7863	21.9814	21.9814	21.9814	21.9814	23.8486	23.8486	23.8486	23.8486
Coagulation factor deficiency syndrome	22.2056	22.2056	22.2056	22.2056	21.1925	21.1925	21.1925	21.1925	20.3298	20.3298	20.3298	20.3298	21.816	21.816	21.816	21.816
Viral Infection	21.2668	21.2668	21.2668	21.2668	19.3176	19.3176	19.3176	19.3176	19.3031	19.3031	19.3031	19.3031	25.3542	25.3542	25.3542	25.3542
Inflammatory response	19.4877	19.4877	19.4877	19.4877	19.5222	19.5222	19.5222	19.5222	21.9306	21.9306	21.9306	21.9306	24.2107	24.2107	24.2107	24.2107
Binding of professional phagocytic cells	20.0477	20.0477	20.0477	20.0477	21.6046	21.6046	21.6046	21.6046	19.9198	19.9198	19.9198	19.9198	23.4109	23.4109	23.4109	23.4109
Progressive neurological disorder	20.3764	20.3764	20.3764	20.3764	21.1388	21.1388	21.1388	21.1388	20.7125	20.7125	20.7125	20.7125	22.4957	22.4957	22.4957	22.4957
Fibrin clot	20.0407	20.0407	20.0407	20.0407	20.7883	20.7883	20.7883	20.7883	19.9788	19.9788	19.9788	19.9788	21.5676	21.5676	21.5676	21.5676
Bleeding	21.3598	21.3598	21.3598	21.3598	18.4118	18.4118	18.4118	18.4118	20.3571	20.3571	20.3571	20.3571	21.1844	21.1844	21.1844	21.1844
Thrombosis of vein	19.1148	19.1148	19.1148	19.1148	21.5727	21.5727	21.5727	21.5727	20.5043	20.5043	20.5043	20.5043	18.6873	18.6873	18.6873	18.6873
Activation of cells	17.36	17.36	17.36	17.36	19.0493	19.0493	19.0493	19.0493	18.8952	18.8952	18.8952	18.8952	23.9127	23.9127	23.9127	23.9127
Inflammation of body cavity	17.6535	17.6535	17.6535	17.6535	18.1854	18.1854	18.1854	18.1854	17.4086	17.4086	17.4086	17.4086	24.1285	24.1285	24.1285	24.1285
Cellular infiltration	19.2372	19.2372	19.2372	19.2372	16.1876	16.1876	16.1876	16.1876	20.5465	20.5465	20.5465	20.5465	21.1514	21.1514	21.1514	21.1514
Peripheral vascular disease	19.3011	19.3011	19.3011	19.3011	18.2599	18.2599	18.2599	18.2599	18.363	18.363	18.363	18.363	19.8298	19.8298	19.8298	19.8298
Inflammation of joint	18.2978	18.2978	18.2978	18.2978	17.3338	17.3338	17.3338	17.3338	17.4584	17.4584	17.4584	17.4584	22.5678	22.5678	22.5678	22.5678
Rheumatic Disease	18.4291	18.4291	18.4291	18.4291	17.634	17.634	17.634	17.634	17.0059	17.0059	17.0059	17.0059	22.5459	22.5459	22.5459	22.5459
Glucose metabolism disorder	16.7466	16.7466	16.7466	16.7466	17.0978	17.0978	17.0978	17.0978	20.1286	20.1286	20.1286	20.1286	20.7774	20.7774	20.7774	20.7774
Hemorrhagic disease	18.8956	18.8956	18.8956	18.8956	17.7051	17.7051	17.7051	17.7051	17.8537	17.8537	17.8537	17.8537	19.9552	19.9552	19.9552	19.9552
Stroke	18.5859	18.5859	18.5859	18.5859	17.3338	17.3338	17.3338	17.3338	18.4533	18.4533	18.4533	18.4533	19.679	19.679	19.679	19.679
Interaction of leukocytes	23.6147	23.6147	23.6147	23.6147	0	0	0	0	24.3092	24.3092	24.3092	24.3092	26.0861	26.0861	26.0861	26.0861
Opsonization	17.9104	17.9104	17.9104	17.9104	16.6211	16.6211	16.6211	16.6211	19.8024	19.8024	19.8024	19.8024	19.5394	19.5394	19.5394	19.5394
Diabetes mellitus	16.8604	16.8604	16.8604	16.8604	16.2103	16.2103	16.2103	16.2103	20.458	20.458	20.458	20.458	20.1974	20.1974	20.1974	20.1974
Fibrinolysis	17.3638	17.3638	17.3638	17.3638	19.9491	19.9491	19.9491	19.9491	17.3103	17.3103	17.3103	17.3103	18.9312	18.9312	18.9312	18.9312
Binding of tumor cell lines	17.6053	17.6053	17.6053	17.6053	17.118	17.118	17.118	17.118	18.2205	18.2205	18.2205	18.2205	20.6067	20.6067	20.6067	20.6067
Alzheimer disease or frontotemporal dementia	23.4233	23.4233	23.4233	23.4233	25.3235	25.3235	25.3235	25.3235	0	0	0	0	24.4893	24.4893	24.4893	24.4893
Cerebrovascular dysfunction	18.1964	18.1964	18.1964	18.1964	17.3073	17.3073	17.3073	17.3073	18.0516	18.0516	18.0516	18.0516	19.0729	19.0729	19.0729	19.0729
Size of lesion	17.7655	17.7655	17.7655	17.7655	16.4767	16.4767	16.4767	16.4767	18.385	18.385	18.385	18.385	19.9857	19.9857	19.9857	19.9857
Damage of genitourinary system	17.8721	17.8721	17.8721	17.8721	16.4082	16.4082	16.4082	16.4082	17.7503	17.7503	17.7503	17.7503	20.0513	20.0513	20.0513	20.0513
Migration of cells	17.2718	17.2718	17.2718	17.2718	15.0763	15.0763	15.0763	15.0763	17.8763	17.8763	17.8763	17.8763	21.1034	21.1034	21.1034	21.1034
Morphology of lesion	17.0063	17.0063	17.0063	17.0063	15.8598	15.8598	15.8598	15.8598	18.3506	18.3506	18.3506	18.3506	19.8593	19.8593	19.8593	19.8593
Complement component deficiency	17.5188	17.5188	17.5188	17.5188	18.1163	18.1163	18.1163	18.1163	17.4692	17.4692	17.4692	17.4692	17.2442	17.2442	17.2442	17.2442
Thrombophilia	17.4077	17.4077	17.4077	17.4077	17.9563	17.9563	17.9563	17.9563	17.3622	17.3622	17.3622	17.3622	17.1556	17.1556	17.1556	17.1556
Lung injury	16.8145	16.8145	16.8145	16.8145	15.4519	15.4519	15.4519	15.4519	18.5421	18.5421	18.5421	18.5421	18.8828	18.8828	18.8828	18.8828
Damage of lung	16.362	16.362	16.362	16.362	15.1312	15.1312	15.1312	15.1312	18.9284	18.9284	18.9284	18.9284	19.2158	19.2158	19.2158	19.2158
Inflammation of absolute anatomical region	15.4153	15.4153	15.4153	15.4153	16.8438	16.8438	16.8438	16.8438	15.1653	15.1653	15.1653	15.1653	22.1404	22.1404	22.1404	22.1404
Catabolism of protein	17.6223	17.6223	17.6223	17.6223	17.6362	17.6362	17.6362	17.6362	16.7477	16.7477	16.7477	16.7477	17.298	17.298	17.298	17.298
Hypertrophic scarring	16.5423	16.5423	16.5423	16.5423	14.6775	14.6775	14.6775	14.6775	19.22	19.22	19.22	19.22	18.8522	18.8522	18.8522	18.8522
Cell movement	16.7109	16.7109	16.7109	16.7109	14.4302	14.4302	14.4302	14.4302	17.2673	17.2673	17.2673	17.2673	20.7422	20.7422	20.7422	20.7422
Hereditary bleeding disorder	17.9018	17.9018	17.9018	17.9018	15.8672	15.8672	15.8672	15.8672	17.8289	17.8289	17.8289	17.8289	17.498	17.498	17.498	17.498
Myocardial infarction	17.9713	17.9713	17.9713	17.9713	15.7648	15.7648	15.7648	15.7648	16.9358	16.9358	16.9358	16.9358	18.1635	18.1635	18.1635	18.1635
Damage of kidney	17.0467	17.0467	17.0467	17.0467	15.4688	15.4688	15.4688	15.4688	16.9325	16.9325	16.9325	16.9325	19.2987	19.2987	19.2987	19.2987
Transport of steroid	17.1793	17.1793	17.1793	17.1793	16.3949	16.3949	16.3949	16.3949	16.0736	16.0736	16.0736	16.0736	17.5798	17.5798	17.5798	17.5798
Activation of myeloid cells	15.63	15.63	15.63	15.63	16.4741	16.4741	16.4741	16.4741	16.2757	16.2757	16.2757	16.2757	18.8113	18.8113	18.8113	18.8113
Binding of endothelial cells	15.8868	15.8868	15.8868	15.8868	16.1766	16.1766	16.1766	16.1766	17.7213	17.7213	17.7213	17.7213	17.2001	17.2001	17.2001	17.2001
Hereditary thrombophilia	16.6638	16.6638	16.6638	16.6638	17.1625	17.1625	17.1625	17.1625	16.6224	16.6224	16.6224	16.6224	16.4345	16.4345	16.4345	16.4345
Transport of lipid	17.4083	17.4083	17.4083	17.4083	15.2717	15.2717	15.2717	15.2717	16.3937	16.3937	16.3937	16.3937	17.5854	17.5854	17.5854	17.5854
Scar tissue	15.9368	15.9368	15.9368	15.9368	14.4228	14.4228	14.4228	14.4228	18.3224	18.3224	18.3224	18.3224	17.9236	17.9236	17.9236	17.9236
Binding of granulocytes	17.0604	17.0604	17.0604	17.0604	17.113	17.113	17.113	17.113	15.8904	15.8904	15.8904	15.8904	16.5215	16.5215	16.5215	16.5215
Metabolism of protein	17.6094	17.6094	17.6094	17.6094	16.6395	16.6395	16.6395	16.6395	15.0555	15.0555	15.0555	15.0555	16.3445	16.3445	16.3445	16.3445
Activation of phagocytes	15.1723	15.1723	15.1723	15.1723	16.0684	16.0684	16.0684	16.0684	15.7888	15.7888	15.7888	15.7888	18.2034	18.2034	18.2034	18.2034
Interaction of phagocytes	20.338	20.338	20.338	20.338	0	0	0	0	20.2064	20.2064	20.2064	20.2064	23.6382	23.6382	23.6382	23.6382
Immune response of cells	14.973	14.973	14.973	14.973	14.9911	14.9911	14.9911	14.9911	14.8041	14.8041	14.8041	14.8041	19.3268	19.3268	19.3268	19.3268
Classical complement pathway	14.9507	14.9507	14.9507	14.9507	15.4955	15.4955	15.4955	15.4955	16.8162	16.8162	16.8162	16.8162	16.5917	16.5917	16.5917	16.5917
Immunodeficiency	14.1629	14.1629	14.1629	14.1629	15.5784	15.5784	15.5784	15.5784	14.8619	14.8619	14.8619	14.8619	18.5106	18.5106	18.5106	18.5106
Thromboembolism	15.5713	15.5713	15.5713	15.5713	16.3052	16.3052	16.3052	16.3052	15.5106	15.5106	15.5106	15.5106	15.235	15.235	15.235	15.235
Venous thromboembolism	15.5377	15.5377	15.5377	15.5377	16.1314	16.1314	16.1314	16.1314	15.4885	15.4885	15.4885	15.4885	15.265	15.265	15.265	15.265
Dengue hemorrhagic fever	15.4291	15.4291	15.4291	15.4291	16.0697	16.0697	16.0697	16.0697	15.376	15.376	15.376	15.376	15.1351	15.1351	15.1351	15.1351
Interaction of blood platelets	15.6623	15.6623	15.6623	15.6623	14.1778	14.1778	14.1778	14.1778	15.5834	15.5834	15.5834	15.5834	16.409	16.409	16.409	16.409
Embolus	14.991	14.991	14.991	14.991	17.2012	17.2012	17.2012	17.2012	14.9269	14.9269	14.9269	14.9269	14.6357	14.6357	14.6357	14.6357
Vasculogenesis	13.3887	13.3887	13.3887	13.3887	12.0266	12.0266	12.0266	12.0266	16.1378	16.1378	16.1378	16.1378	20.1833	20.1833	20.1833	20.1833
Engulfment of cells	14.785	14.785	14.785	14.785	15.235	15.235	15.235	15.235	14.6305	14.6305	14.6305	14.6305	16.6431	16.6431	16.6431	16.6431
Cellular infiltration by leukocytes	15.2625	15.2625	15.2625	15.2625	12.7981	12.7981	12.7981	12.7981	16.5316	16.5316	16.5316	16.5316	16.5056	16.5056	16.5056	16.5056
Autosomal recessive immunodeficiency	14.5488	14.5488	14.5488	14.5488	14.4805	14.4805	14.4805	14.4805	14.4639	14.4639	14.4639	14.4639	17.2776	17.2776	17.2776	17.2776
Hereditary angioedema	14.6893	14.6893	14.6893	14.6893	15.2335	15.2335	15.2335	15.2335	14.6442	14.6442	14.6442	14.6442	14.4393	14.4393	14.4393	14.4393
Efflux of lipid	14.3799	14.3799	14.3799	14.3799	14.3901	14.3901	14.3901	14.3901	14.2919	14.2919	14.2919	14.2919	15.9206	15.9206	15.9206	15.9206
Systemic autoimmune syndrome	13.5146	13.5146	13.5146	13.5146	13.585	13.585	13.585	13.585	13.7908	13.7908	13.7908	13.7908	17.925	17.925	17.925	17.925
Metabolism of reactive oxygen species	14.3381	14.3381	14.3381	14.3381	12.469	12.469	12.469	12.469	15.4413	15.4413	15.4413	15.4413	16.5622	16.5622	16.5622	16.5622
Acute lung injury	15.0884	15.0884	15.0884	15.0884	14.0984	14.0984	14.0984	14.0984	14.9964	14.9964	14.9964	14.9964	14.5795	14.5795	14.5795	14.5795
Efflux of cholesterol	14.3088	14.3088	14.3088	14.3088	14.2505	14.2505	14.2505	14.2505	14.2242	14.2242	14.2242	14.2242	15.9254	15.9254	15.9254	15.9254
Activation of blood cells	13.2018	13.2018	13.2018	13.2018	13.4966	13.4966	13.4966	13.4966	14.7775	14.7775	14.7775	14.7775	16.9228	16.9228	16.9228	16.9228
Fatty acid metabolism	15.0207	15.0207	15.0207	15.0207	14.368	14.368	14.368	14.368	14.2136	14.2136	14.2136	14.2136	14.7186	14.7186	14.7186	14.7186
Binding of vascular endothelial cells	14.4039	14.4039	14.4039	14.4039	14.3416	14.3416	14.3416	14.3416	14.3192	14.3192	14.3192	14.3192	14.9718	14.9718	14.9718	14.9718
Development of vasculature	13.2665	13.2665	13.2665	13.2665	11.5011	11.5011	11.5011	11.5011	14.6264	14.6264	14.6264	14.6264	18.5434	18.5434	18.5434	18.5434
Binding of blood platelets	14.609	14.609	14.609	14.609	13.1135	13.1135	13.1135	13.1135	14.5343	14.5343	14.5343	14.5343	15.3609	15.3609	15.3609	15.3609
Injury of kidney	14.158	14.158	14.158	14.158	12.2716	12.2716	12.2716	12.2716	14.0671	14.0671	14.0671	14.0671	16.603	16.603	16.603	16.603
Cholesterol transport	13.8667	13.8667	13.8667	13.8667	13.8964	13.8964	13.8964	13.8964	13.7793	13.7793	13.7793	13.7793	15.3578	15.3578	15.3578	15.3578
Non-malignant disorder	13.2537	13.2537	13.2537	13.2537	11.7042	11.7042	11.7042	11.7042	13.8994	13.8994	13.8994	13.8994	17.3564	17.3564	17.3564	17.3564
Proteolysis	14.7657	14.7657	14.7657	14.7657	13.3302	13.3302	13.3302	13.3302	14.658	14.658	14.658	14.658	13.3164	13.3164	13.3164	13.3164
Autosomal recessive immunological disorder	13.659	13.659	13.659	13.659	13.0416	13.0416	13.0416	13.0416	13.5593	13.5593	13.5593	13.5593	15.7589	15.7589	15.7589	15.7589
Non-traumatic arthropathy	13.4011	13.4011	13.4011	13.4011	13.1928	13.1928	13.1928	13.1928	12.1163	12.1163	12.1163	12.1163	17.0346	17.0346	17.0346	17.0346
Chronic inflammatory disorder	11.6636	11.6636	11.6636	11.6636	13.4668	13.4668	13.4668	13.4668	11.9664	11.9664	11.9664	11.9664	17.9169	17.9169	17.9169	17.9169
Atherosclerotic lesion	14.3435	14.3435	14.3435	14.3435	11.6093	11.6093	11.6093	11.6093	14.2491	14.2491	14.2491	14.2491	14.7665	14.7665	14.7665	14.7665
Angiogenesis	12.2517	12.2517	12.2517	12.2517	10.7767	10.7767	10.7767	10.7767	14.1715	14.1715	14.1715	14.1715	17.6738	17.6738	17.6738	17.6738
Activation of macrophages	12.1222	12.1222	12.1222	12.1222	14.2013	14.2013	14.2013	14.2013	13.6351	13.6351	13.6351	13.6351	14.781	14.781	14.781	14.781
Bleeding time	12.9561	12.9561	12.9561	12.9561	13.6757	13.6757	13.6757	13.6757	14.1846	14.1846	14.1846	14.1846	13.8952	13.8952	13.8952	13.8952
Adhesion of myeloid cells	13.1539	13.1539	13.1539	13.1539	14.2062	14.2062	14.2062	14.2062	13.0674	13.0674	13.0674	13.0674	13.6157	13.6157	13.6157	13.6157
Cytolysis	13.1354	13.1354	13.1354	13.1354	11.8733	11.8733	11.8733	11.8733	12.2238	12.2238	12.2238	12.2238	16.7361	16.7361	16.7361	16.7361
Sclerotic lesion	14.0446	14.0446	14.0446	14.0446	11.4903	11.4903	11.4903	11.4903	13.9474	13.9474	13.9474	13.9474	14.4137	14.4137	14.4137	14.4137
Synthesis of reactive oxygen species	12.5993	12.5993	12.5993	12.5993	11.2761	11.2761	11.2761	11.2761	14.3066	14.3066	14.3066	14.3066	15.4548	15.4548	15.4548	15.4548
Binding of neutrophils	13.821	13.821	13.821	13.821	13.6331	13.6331	13.6331	13.6331	12.6736	12.6736	12.6736	12.6736	13.3928	13.3928	13.3928	13.3928
Quantity of blood cells	12.9803	12.9803	12.9803	12.9803	11.6464	11.6464	11.6464	11.6464	12.2749	12.2749	12.2749	12.2749	16.606	16.606	16.606	16.606
Chronic fatigue syndrome	12.7727	12.7727	12.7727	12.7727	14.8466	14.8466	14.8466	14.8466	12.7169	12.7169	12.7169	12.7169	12.4638	12.4638	12.4638	12.4638
Survival of organism	11.8338	11.8338	11.8338	11.8338	12.1266	12.1266	12.1266	12.1266	12.7612	12.7612	12.7612	12.7612	15.941	15.941	15.941	15.941
Interaction of granulocytes	18.0499	18.0499	18.0499	18.0499	0	0	0	0	16.8595	16.8595	16.8595	16.8595	17.4867	17.4867	17.4867	17.4867
Adhesion of granulocytes	13.5124	13.5124	13.5124	13.5124	13.3391	13.3391	13.3391	13.3391	12.3832	12.3832	12.3832	12.3832	13.0859	13.0859	13.0859	13.0859
Cellular infiltration by granulocytes	13.3241	13.3241	13.3241	13.3241	12.0419	12.0419	12.0419	12.0419	12.4041	12.4041	12.4041	12.4041	14.3832	14.3832	14.3832	14.3832
Disorder of coronary artery	14.8751	14.8751	14.8751	14.8751	10.598	10.598	10.598	10.598	13.1492	13.1492	13.1492	13.1492	13.4226	13.4226	13.4226	13.4226
Hypersensitive reaction	13.4368	13.4368	13.4368	13.4368	11.4132	11.4132	11.4132	11.4132	10.6088	10.6088	10.6088	10.6088	16.2759	16.2759	16.2759	16.2759
Acute coronary syndrome	14.4591	14.4591	14.4591	14.4591	10.785	10.785	10.785	10.785	11.5769	11.5769	11.5769	11.5769	14.8867	14.8867	14.8867	14.8867
Hemolysis	13.0257	13.0257	13.0257	13.0257	10.7939	10.7939	10.7939	10.7939	12.9491	12.9491	12.9491	12.9491	14.6838	14.6838	14.6838	14.6838
Transport of molecule	12.6498	12.6498	12.6498	12.6498	11.2757	11.2757	11.2757	11.2757	11.5272	11.5272	11.5272	11.5272	15.9469	15.9469	15.9469	15.9469
Quantity of cells	12.0232	12.0232	12.0232	12.0232	10.7097	10.7097	10.7097	10.7097	11.3556	11.3556	11.3556	11.3556	17.2262	17.2262	17.2262	17.2262
Activation of antigen presenting cells	11.3927	11.3927	11.3927	11.3927	13.4807	13.4807	13.4807	13.4807	12.7384	12.7384	12.7384	12.7384	13.6872	13.6872	13.6872	13.6872
Atopic disease	14.668	14.668	14.668	14.668	10.3063	10.3063	10.3063	10.3063	10.6244	10.6244	10.6244	10.6244	15.6667	15.6667	15.6667	15.6667
Immune response of leukocytes	11.3526	11.3526	11.3526	11.3526	11.901	11.901	11.901	11.901	12.6951	12.6951	12.6951	12.6951	15.1664	15.1664	15.1664	15.1664
Infiltration by neutrophils	12.2247	12.2247	12.2247	12.2247	12.4369	12.4369	12.4369	12.4369	12.9963	12.9963	12.9963	12.9963	13.4251	13.4251	13.4251	13.4251
Cleavage of protein fragment	13.4714	13.4714	13.4714	13.4714	11.7857	11.7857	11.7857	11.7857	13.3782	13.3782	13.3782	13.3782	12.0734	12.0734	12.0734	12.0734
Aortic atherosclerosis	13.5538	13.5538	13.5538	13.5538	10.3288	10.3288	10.3288	10.3288	13.4941	13.4941	13.4941	13.4941	13.2228	13.2228	13.2228	13.2228
Size of infarct	11.8344	11.8344	11.8344	11.8344	12.8653	12.8653	12.8653	12.8653	12.6408	12.6408	12.6408	12.6408	13.1295	13.1295	13.1295	13.1295
Hyperlipidemia	13.95	13.95	13.95	13.95	11.0069	11.0069	11.0069	11.0069	11.9272	11.9272	11.9272	11.9272	13.4665	13.4665	13.4665	13.4665
Phagocytosis of cells	11.8838	11.8838	11.8838	11.8838	12.5211	12.5211	12.5211	12.5211	11.7704	11.7704	11.7704	11.7704	14.1071	14.1071	14.1071	14.1071
Adhesion of neutrophils	13.0354	13.0354	13.0354	13.0354	12.7244	12.7244	12.7244	12.7244	11.8632	11.8632	11.8632	11.8632	12.6485	12.6485	12.6485	12.6485
Acute respiratory disorder	12.038	12.038	12.038	12.038	11.7408	11.7408	11.7408	11.7408	12.6931	12.6931	12.6931	12.6931	13.7239	13.7239	13.7239	13.7239
Aortic occlusive disease	13.1874	13.1874	13.1874	13.1874	10.0887	10.0887	10.0887	10.0887	13.1073	13.1073	13.1073	13.1073	13.7477	13.7477	13.7477	13.7477
Volume of lesion	13.0377	13.0377	13.0377	13.0377	12.2203	12.2203	12.2203	12.2203	12.9482	12.9482	12.9482	12.9482	11.6573	11.6573	11.6573	11.6573
Systemic inflammatory response syndrome and/or sepsis	11.0388	11.0388	11.0388	11.0388	11.5912	11.5912	11.5912	11.5912	13.09	13.09	13.09	13.09	14.0214	14.0214	14.0214	14.0214
Adhesion of phagocytes	12.0814	12.0814	12.0814	12.0814	12.0448	12.0448	12.0448	12.0448	12.0027	12.0027	12.0027	12.0027	13.5501	13.5501	13.5501	13.5501
Phagocytosis	12.3061	12.3061	12.3061	12.3061	11.648	11.648	11.648	11.648	11.5067	11.5067	11.5067	11.5067	13.6795	13.6795	13.6795	13.6795
Fibrosis	13.1091	13.1091	13.1091	13.1091	11.4111	11.4111	11.4111	11.4111	10.8387	10.8387	10.8387	10.8387	13.688	13.688	13.688	13.688
Vascular lesion	12.2431	12.2431	12.2431	12.2431	10.3978	10.3978	10.3978	10.3978	12.1372	12.1372	12.1372	12.1372	13.9524	13.9524	13.9524	13.9524
Activation of leukocytes	10.5502	10.5502	10.5502	10.5502	11.7558	11.7558	11.7558	11.7558	12.051	12.051	12.051	12.051	14.1767	14.1767	14.1767	14.1767
Familial amyloidosis	11.0295	11.0295	11.0295	11.0295	11.606	11.606	11.606	11.606	10.9818	10.9818	10.9818	10.9818	14.8681	14.8681	14.8681	14.8681
Angioedema	12.0429	12.0429	12.0429	12.0429	12.6248	12.6248	12.6248	12.6248	11.9948	11.9948	11.9948	11.9948	11.7762	11.7762	11.7762	11.7762
Dyslipidemia	13.3579	13.3579	13.3579	13.3579	10.6651	10.6651	10.6651	10.6651	11.4451	11.4451	11.4451	11.4451	12.8611	12.8611	12.8611	12.8611
Cellular infiltration by myeloid cells	11.709	11.709	11.709	11.709	9.51173	9.51173	9.51173	9.51173	13.0193	13.0193	13.0193	13.0193	13.9072	13.9072	13.9072	13.9072
Cellular infiltration by phagocytes	11.3327	11.3327	11.3327	11.3327	9.70388	9.70388	9.70388	9.70388	13.4201	13.4201	13.4201	13.4201	13.618	13.618	13.618	13.618
Sepsis	10.552	10.552	10.552	10.552	11.0633	11.0633	11.0633	11.0633	12.5878	12.5878	12.5878	12.5878	13.5265	13.5265	13.5265	13.5265
Inflammation of lung	12.4781	12.4781	12.4781	12.4781	9.55999	9.55999	9.55999	9.55999	12.3604	12.3604	12.3604	12.3604	13.2448	13.2448	13.2448	13.2448
Endocytosis	12.0419	12.0419	12.0419	12.0419	11.1956	11.1956	11.1956	11.1956	11.2994	11.2994	11.2994	11.2994	13.083	13.083	13.083	13.083
Atherogenesis	10.9294	10.9294	10.9294	10.9294	10.4805	10.4805	10.4805	10.4805	13.1621	13.1621	13.1621	13.1621	12.8598	12.8598	12.8598	12.8598
Extraintestinal functional disorder	11.8768	11.8768	11.8768	11.8768	11.889	11.889	11.889	11.889	11.7579	11.7579	11.7579	11.7579	11.8878	11.8878	11.8878	11.8878
Infarction of cerebrum	11.4664	11.4664	11.4664	11.4664	13.3843	13.3843	13.3843	13.3843	11.4013	11.4013	11.4013	11.4013	11.1061	11.1061	11.1061	11.1061
Hereditary connective tissue disorder	10.6627	10.6627	10.6627	10.6627	10.9758	10.9758	10.9758	10.9758	11.7317	11.7317	11.7317	11.7317	13.5659	13.5659	13.5659	13.5659
Organismal death	11.597	11.597	11.597	11.597	10.2708	10.2708	10.2708	10.2708	9.47768	9.47768	9.47768	9.47768	15.5528	15.5528	15.5528	15.5528
Ischemic stroke	13.5321	13.5321	13.5321	13.5321	10.0069	10.0069	10.0069	10.0069	11.3032	11.3032	11.3032	11.3032	12.0523	12.0523	12.0523	12.0523
Cell movement of muscle cells	10.9347	10.9347	10.9347	10.9347	9.37622	9.37622	9.37622	9.37622	13.4422	13.4422	13.4422	13.4422	13.0061	13.0061	13.0061	13.0061
Dermatitis	11.6118	11.6118	11.6118	11.6118	9.14055	9.14055	9.14055	9.14055	10.2205	10.2205	10.2205	10.2205	15.6335	15.6335	15.6335	15.6335
Familial cardiovascular disease	12.7663	12.7663	12.7663	12.7663	8.39956	8.39956	8.39956	8.39956	11.3242	11.3242	11.3242	11.3242	14.0366	14.0366	14.0366	14.0366
Renal vascular disorder	11.1811	11.1811	11.1811	11.1811	11.7141	11.7141	11.7141	11.7141	12.5958	12.5958	12.5958	12.5958	10.9368	10.9368	10.9368	10.9368
Psoriasis	10.9362	10.9362	10.9362	10.9362	10.5036	10.5036	10.5036	10.5036	10.8125	10.8125	10.8125	10.8125	14.0357	14.0357	14.0357	14.0357
Adhesion of tumor cell lines	10.333	10.333	10.333	10.333	10.8	10.8	10.8	10.8	11.6539	11.6539	11.6539	11.6539	13.354	13.354	13.354	13.354
Inflammation of respiratory system component	12.399	12.399	12.399	12.399	8.53111	8.53111	8.53111	8.53111	10.4528	10.4528	10.4528	10.4528	14.755	14.755	14.755	14.755
Renal impairment	10.8073	10.8073	10.8073	10.8073	11.1661	11.1661	11.1661	11.1661	11.4684	11.4684	11.4684	11.4684	12.5446	12.5446	12.5446	12.5446
Coronary artery disease	13.2806	13.2806	13.2806	13.2806	10.0077	10.0077	10.0077	10.0077	11.4611	11.4611	11.4611	11.4611	11.0672	11.0672	11.0672	11.0672
Proliferation of endothelial cells	10.0004	10.0004	10.0004	10.0004	10.4246	10.4246	10.4246	10.4246	10.6067	10.6067	10.6067	10.6067	14.5811	14.5811	14.5811	14.5811
Concentration of lipid	11.1395	11.1395	11.1395	11.1395	9.51988	9.51988	9.51988	9.51988	11.9933	11.9933	11.9933	11.9933	12.7307	12.7307	12.7307	12.7307
Endothelial cell development	10.0031	10.0031	10.0031	10.0031	10.5214	10.5214	10.5214	10.5214	11.2641	11.2641	11.2641	11.2641	13.5926	13.5926	13.5926	13.5926
Immune response of myeloid cells	9.81358	9.81358	9.81358	9.81358	10.8035	10.8035	10.8035	10.8035	11.319	11.319	11.319	11.319	13.377	13.377	13.377	13.377
Migration of epithelial cells	9.46613	9.46613	9.46613	9.46613	11.2183	11.2183	11.2183	11.2183	13.2861	13.2861	13.2861	13.2861	10.9691	10.9691	10.9691	10.9691
Migration of phagocytes	10.9164	10.9164	10.9164	10.9164	9.80963	9.80963	9.80963	9.80963	11.5626	11.5626	11.5626	11.5626	12.5995	12.5995	12.5995	12.5995
Immune response of phagocytes	9.73977	9.73977	9.73977	9.73977	10.7629	10.7629	10.7629	10.7629	11.1923	11.1923	11.1923	11.1923	13.1573	13.1573	13.1573	13.1573
Binding of carbohydrate	10.6086	10.6086	10.6086	10.6086	10.2688	10.2688	10.2688	10.2688	11.6023	11.6023	11.6023	11.6023	12.3707	12.3707	12.3707	12.3707
Ischemia of brain	11.1022	11.1022	11.1022	11.1022	9.51186	9.51186	9.51186	9.51186	12.1869	12.1869	12.1869	12.1869	11.9037	11.9037	11.9037	11.9037
Export of molecule	10.4147	10.4147	10.4147	10.4147	11.5937	11.5937	11.5937	11.5937	10.3186	10.3186	10.3186	10.3186	12.0356	12.0356	12.0356	12.0356
Acute myocardial infarction	11.7454	11.7454	11.7454	11.7454	9.44158	9.44158	9.44158	9.44158	10.6578	10.6578	10.6578	10.6578	12.3921	12.3921	12.3921	12.3921
Cell movement of epithelial cells	9.76796	9.76796	9.76796	9.76796	10.6122	10.6122	10.6122	10.6122	12.4219	12.4219	12.4219	12.4219	11.1373	11.1373	11.1373	11.1373
Ovarian cancer	10.9006	10.9006	10.9006	10.9006	9.58584	9.58584	9.58584	9.58584	10.6822	10.6822	10.6822	10.6822	12.6453	12.6453	12.6453	12.6453
Adhesion of blood platelets	10.7628	10.7628	10.7628	10.7628	10.124	10.124	10.124	10.124	10.7117	10.7117	10.7117	10.7117	11.7012	11.7012	11.7012	11.7012
Hypercholesterolemia	10.7072	10.7072	10.7072	10.7072	10.2732	10.2732	10.2732	10.2732	10.6494	10.6494	10.6494	10.6494	11.4797	11.4797	11.4797	11.4797
Hereditary angioedema type III	10.6797	10.6797	10.6797	10.6797	11.0733	11.0733	11.0733	11.0733	10.647	10.647	10.647	10.647	10.4988	10.4988	10.4988	10.4988
Benign lesion	9.72233	9.72233	9.72233	9.72233	8.75657	8.75657	8.75657	8.75657	10.9876	10.9876	10.9876	10.9876	13.1609	13.1609	13.1609	13.1609
Transmission of lipid	10.6037	10.6037	10.6037	10.6037	11.0437	11.0437	11.0437	11.0437	10.5673	10.5673	10.5673	10.5673	10.4017	10.4017	10.4017	10.4017
Efflux of phospholipid	10.5652	10.5652	10.5652	10.5652	11.0506	11.0506	11.0506	11.0506	10.525	10.525	10.525	10.525	10.3426	10.3426	10.3426	10.3426
Bacterial pneumonia	10.5652	10.5652	10.5652	10.5652	9.54886	9.54886	9.54886	9.54886	10.525	10.525	10.525	10.525	11.8273	11.8273	11.8273	11.8273
Development of epithelial tissue	8.69983	8.69983	8.69983	8.69983	10.0411	10.0411	10.0411	10.0411	10.9188	10.9188	10.9188	10.9188	12.797	12.797	12.797	12.797
Cell spreading	10.065	10.065	10.065	10.065	8.07726	8.07726	8.07726	8.07726	10.7336	10.7336	10.7336	10.7336	13.4434	13.4434	13.4434	13.4434
Cell movement of smooth muscle cells	10.0235	10.0235	10.0235	10.0235	8.38897	8.38897	8.38897	8.38897	12.5409	12.5409	12.5409	12.5409	11.2731	11.2731	11.2731	11.2731
Allergy	12.0609	12.0609	12.0609	12.0609	8.67841	8.67841	8.67841	8.67841	8.69613	8.69613	8.69613	8.69613	12.7621	12.7621	12.7621	12.7621
Myocardial dysfunction	10.4254	10.4254	10.4254	10.4254	9.0332	9.0332	9.0332	9.0332	10.3403	10.3403	10.3403	10.3403	12.3361	12.3361	12.3361	12.3361
Deep vein thrombosis	10.447	10.447	10.447	10.447	10.8402	10.8402	10.8402	10.8402	10.4144	10.4144	10.4144	10.4144	10.2664	10.2664	10.2664	10.2664
Thrombosis of artery	10.344	10.344	10.344	10.344	10.8727	10.8727	10.8727	10.8727	11.6675	11.6675	11.6675	11.6675	8.80294	8.80294	8.80294	8.80294
Formation of blood clot	10.3448	10.3448	10.3448	10.3448	10.9594	10.9594	10.9594	10.9594	10.294	10.294	10.294	10.294	10.0638	10.0638	10.0638	10.0638
Failure of kidney	9.53979	9.53979	9.53979	9.53979	9.77222	9.77222	9.77222	9.77222	10.2045	10.2045	10.2045	10.2045	11.3217	11.3217	11.3217	11.3217
Chemotaxis	9.54931	9.54931	9.54931	9.54931	9.75445	9.75445	9.75445	9.75445	9.43301	9.43301	9.43301	9.43301	11.8197	11.8197	11.8197	11.8197
Benign thyroid nodule	10.4413	10.4413	10.4413	10.4413	9.43914	9.43914	9.43914	9.43914	8.96956	8.96956	8.96956	8.96956	11.6885	11.6885	11.6885	11.6885
Acute coronary event	10.2364	10.2364	10.2364	10.2364	9.32023	9.32023	9.32023	9.32023	9.30478	9.30478	9.30478	9.30478	11.582	11.582	11.582	11.582
Venous stasis syndrome	10.0089	10.0089	10.0089	10.0089	10.3061	10.3061	10.3061	10.3061	9.9843	9.9843	9.9843	9.9843	9.87227	9.87227	9.87227	9.87227
Cell movement of endothelial cells	9.34168	9.34168	9.34168	9.34168	7.29548	7.29548	7.29548	7.29548	11.9095	11.9095	11.9095	11.9095	11.3842	11.3842	11.3842	11.3842
Migration of endothelial cells	9.65266	9.65266	9.65266	9.65266	7.45713	7.45713	7.45713	7.45713	12.3349	12.3349	12.3349	12.3349	10.437	10.437	10.437	10.437
Gonadal tumor	9.57228	9.57228	9.57228	9.57228	8.45938	8.45938	8.45938	8.45938	9.75119	9.75119	9.75119	9.75119	11.9625	11.9625	11.9625	11.9625
Fibrogenesis	8.24529	8.24529	8.24529	8.24529	11.4138	11.4138	11.4138	11.4138	9.90391	9.90391	9.90391	9.90391	9.98907	9.98907	9.98907	9.98907
Thrombosis of kidney	9.46376	9.46376	9.46376	9.46376	9.89956	9.89956	9.89956	9.89956	10.9213	10.9213	10.9213	10.9213	9.26387	9.26387	9.26387	9.26387
Ventricular dysfunction	9.59345	9.59345	9.59345	9.59345	8.90804	8.90804	8.90804	8.90804	10.309	10.309	10.309	10.309	10.7322	10.7322	10.7322	10.7322
Early stage Staphylococcus aureus pneumonia	9.83472	9.83472	9.83472	9.83472	8.53826	8.53826	8.53826	8.53826	9.80228	9.80228	9.80228	9.80228	11.3508	11.3508	11.3508	11.3508
Thrombocytopenia	10.1594	10.1594	10.1594	10.1594	8.70846	8.70846	8.70846	8.70846	9.29691	9.29691	9.29691	9.29691	11.2925	11.2925	11.2925	11.2925
Abnormal aortic valve physiology	8.71678	8.71678	8.71678	8.71678	10.4279	10.4279	10.4279	10.4279	9.72358	9.72358	9.72358	9.72358	10.5523	10.5523	10.5523	10.5523
Quantity of metal	9.52284	9.52284	9.52284	9.52284	9.13352	9.13352	9.13352	9.13352	8.84373	8.84373	8.84373	8.84373	11.7887	11.7887	11.7887	11.7887
Macular degeneration	8.91077	8.91077	8.91077	8.91077	9.51186	9.51186	9.51186	9.51186	11.044	11.044	11.044	11.044	9.69081	9.69081	9.69081	9.69081
Coagulation of plasma	9.31963	9.31963	9.31963	9.31963	11.3959	11.3959	11.3959	11.3959	9.28732	9.28732	9.28732	9.28732	9.14058	9.14058	9.14058	9.14058
Chronic kidney disease	9.14272	9.14272	9.14272	9.14272	9.4366	9.4366	9.4366	9.4366	9.76639	9.76639	9.76639	9.76639	10.795	10.795	10.795	10.795
Recruitment of cells	8.7951	8.7951	8.7951	8.7951	9.23753	9.23753	9.23753	9.23753	10.6868	10.6868	10.6868	10.6868	10.2128	10.2128	10.2128	10.2128
Formation of filaments	8.33817	8.33817	8.33817	8.33817	10.8416	10.8416	10.8416	10.8416	10.0824	10.0824	10.0824	10.0824	9.59344	9.59344	9.59344	9.59344
Abnormal metabolism	10.5125	10.5125	10.5125	10.5125	7.80092	7.80092	7.80092	7.80092	9.11468	9.11468	9.11468	9.11468	11.2342	11.2342	11.2342	11.2342
Adhesion of bacteria	10.0263	10.0263	10.0263	10.0263	10.4184	10.4184	10.4184	10.4184	8.33094	8.33094	8.33094	8.33094	9.84622	9.84622	9.84622	9.84622
Disorder of lipid metabolism	10.2478	10.2478	10.2478	10.2478	8.42451	8.42451	8.42451	8.42451	8.75108	8.75108	8.75108	8.75108	11.1702	11.1702	11.1702	11.1702
Neuromuscular disease	9.20198	9.20198	9.20198	9.20198	8.83812	8.83812	8.83812	8.83812	9.04067	9.04067	9.04067	9.04067	11.447	11.447	11.447	11.447
Rheumatoid arthritis	8.83986	8.83986	8.83986	8.83986	9.24203	9.24203	9.24203	9.24203	7.71594	7.71594	7.71594	7.71594	12.4709	12.4709	12.4709	12.4709
Serous adenocarcinoma	9.05936	9.05936	9.05936	9.05936	6.3891	6.3891	6.3891	6.3891	9.40401	9.40401	9.40401	9.40401	13.3683	13.3683	13.3683	13.3683
Aortic valve disease	8.46406	8.46406	8.46406	8.46406	10.1363	10.1363	10.1363	10.1363	9.39297	9.39297	9.39297	9.39297	10.1308	10.1308	10.1308	10.1308
Interaction of protein	9.01637	9.01637	9.01637	9.01637	7.43415	7.43415	7.43415	7.43415	10.5849	10.5849	10.5849	10.5849	11.0578	11.0578	11.0578	11.0578
Atopic dermatitis	10.5504	10.5504	10.5504	10.5504	8.36919	8.36919	8.36919	8.36919	7.47163	7.47163	7.47163	7.47163	11.6604	11.6604	11.6604	11.6604
Dysfunction of heart	9.21409	9.21409	9.21409	9.21409	8.63691	8.63691	8.63691	8.63691	9.88472	9.88472	9.88472	9.88472	10.2553	10.2553	10.2553	10.2553
Cell movement of mononuclear leukocytes	9.60246	9.60246	9.60246	9.60246	9.15159	9.15159	9.15159	9.15159	8.35271	8.35271	8.35271	8.35271	10.7183	10.7183	10.7183	10.7183
Quantity of protein lipid complex in blood	9.37899	9.37899	9.37899	9.37899	7.7585	7.7585	7.7585	7.7585	10.4448	10.4448	10.4448	10.4448	10.1987	10.1987	10.1987	10.1987
Recruitment of leukocytes	8.46878	8.46878	8.46878	8.46878	8.82473	8.82473	8.82473	8.82473	9.716	9.716	9.716	9.716	10.6509	10.6509	10.6509	10.6509
Recruitment of phagocytes	8.74556	8.74556	8.74556	8.74556	8.94729	8.94729	8.94729	8.94729	9.39137	9.39137	9.39137	9.39137	10.4845	10.4845	10.4845	10.4845
Quantity of myeloid cells	9.52351	9.52351	9.52351	9.52351	9.24127	9.24127	9.24127	9.24127	9.40256	9.40256	9.40256	9.40256	9.39817	9.39817	9.39817	9.39817
Cell movement of macrophages	7.93909	7.93909	7.93909	7.93909	8.2584	8.2584	8.2584	8.2584	10.5468	10.5468	10.5468	10.5468	10.7936	10.7936	10.7936	10.7936
Huntington Disease	9.62965	9.62965	9.62965	9.62965	7.87702	7.87702	7.87702	7.87702	9.50124	9.50124	9.50124	9.50124	10.5175	10.5175	10.5175	10.5175
Congenital bleeding disorder	9.98107	9.98107	9.98107	9.98107	7.65765	7.65765	7.65765	7.65765	9.94112	9.94112	9.94112	9.94112	9.75978	9.75978	9.75978	9.75978
Age-related macular degeneration	8.395	8.395	8.395	8.395	8.90984	8.90984	8.90984	8.90984	10.7117	10.7117	10.7117	10.7117	9.29892	9.29892	9.29892	9.29892
Chemotaxis of phagocytes	8.33796	8.33796	8.33796	8.33796	8.60099	8.60099	8.60099	8.60099	8.94118	8.94118	8.94118	8.94118	11.3977	11.3977	11.3977	11.3977
Cross-linkage of peptide	9.6538	9.6538	9.6538	9.6538	8.38479	8.38479	8.38479	8.38479	8.01638	8.01638	8.01638	8.01638	11.1402	11.1402	11.1402	11.1402
Primary hypercholesterolemia	9.56873	9.56873	9.56873	9.56873	8.6647	8.6647	8.6647	8.6647	9.52897	9.52897	9.52897	9.52897	9.34851	9.34851	9.34851	9.34851
Ischemia of heart	9.14664	9.14664	9.14664	9.14664	8.34145	8.34145	8.34145	8.34145	9.07547	9.07547	9.07547	9.07547	10.3696	10.3696	10.3696	10.3696
Reverse cholesterol transport	9.16464	9.16464	9.16464	9.16464	9.55414	9.55414	9.55414	9.55414	9.13238	9.13238	9.13238	9.13238	8.98585	8.98585	8.98585	8.98585
Migration of muscle cells	9.0942	9.0942	9.0942	9.0942	6.73184	6.73184	6.73184	6.73184	10.6722	10.6722	10.6722	10.6722	10.3113	10.3113	10.3113	10.3113
Adhesion of endothelial cells	8.46672	8.46672	8.46672	8.46672	8.32479	8.32479	8.32479	8.32479	10.153	10.153	10.153	10.153	9.83633	9.83633	9.83633	9.83633
Production of reactive oxygen species	8.18005	8.18005	8.18005	8.18005	7.61736	7.61736	7.61736	7.61736	9.8302	9.8302	9.8302	9.8302	11.136	11.136	11.136	11.136
Damage of vascular system	7.69467	7.69467	7.69467	7.69467	8.46102	8.46102	8.46102	8.46102	9.2083	9.2083	9.2083	9.2083	11.3673	11.3673	11.3673	11.3673
Permeability of vascular system	7.6711	7.6711	7.6711	7.6711	10.1238	10.1238	10.1238	10.1238	9.18151	9.18151	9.18151	9.18151	9.66197	9.66197	9.66197	9.66197
Quantity of leukocytes	9.0591	9.0591	9.0591	9.0591	8.01701	8.01701	8.01701	8.01701	8.45985	8.45985	8.45985	8.45985	11.0044	11.0044	11.0044	11.0044
Internalization of cells	8.13928	8.13928	8.13928	8.13928	9.86374	9.86374	9.86374	9.86374	8.71312	8.71312	8.71312	8.71312	9.64899	9.64899	9.64899	9.64899
Marfan syndrome	7.7515	7.7515	7.7515	7.7515	9.499	9.499	9.499	9.499	8.9821	8.9821	8.9821	8.9821	10.1018	10.1018	10.1018	10.1018
Hereditary systemic amyloidosis	9.5364	9.5364	9.5364	9.5364	7.69926	7.69926	7.69926	7.69926	7.43278	7.43278	7.43278	7.43278	11.6528	11.6528	11.6528	11.6528
Chemotaxis of myeloid cells	8.44886	8.44886	8.44886	8.44886	8.00261	8.00261	8.00261	8.00261	9.05781	9.05781	9.05781	9.05781	10.795	10.795	10.795	10.795
Non-insulin-dependent diabetes mellitus	8.93152	8.93152	8.93152	8.93152	8.96595	8.96595	8.96595	8.96595	9.41795	9.41795	9.41795	9.41795	8.92818	8.92818	8.92818	8.92818
Metabolic syndrome X	8.08835	8.08835	8.08835	8.08835	8.79212	8.79212	8.79212	8.79212	8.89805	8.89805	8.89805	8.89805	10.3957	10.3957	10.3957	10.3957
Benign Tumors	7.69884	7.69884	7.69884	7.69884	7.41294	7.41294	7.41294	7.41294	9.4028	9.4028	9.4028	9.4028	11.6576	11.6576	11.6576	11.6576
Calcification of aortic valve	7.92457	7.92457	7.92457	7.92457	9.77884	9.77884	9.77884	9.77884	9.30754	9.30754	9.30754	9.30754	9.14395	9.14395	9.14395	9.14395
Dyskinesia	9.14021	9.14021	9.14021	9.14021	7.52927	7.52927	7.52927	7.52927	9.52798	9.52798	9.52798	9.52798	9.95526	9.95526	9.95526	9.95526
Pneumonia	8.73881	8.73881	8.73881	8.73881	8.58255	8.58255	8.58255	8.58255	9.55693	9.55693	9.55693	9.55693	9.25794	9.25794	9.25794	9.25794
Inflammation of gastrointestinal tract	7.07238	7.07238	7.07238	7.07238	8.27547	8.27547	8.27547	8.27547	7.48491	7.48491	7.48491	7.48491	13.2758	13.2758	13.2758	13.2758
Abnormality of left ventricle	8.56314	8.56314	8.56314	8.56314	8.04051	8.04051	8.04051	8.04051	9.19922	9.19922	9.19922	9.19922	10.274	10.274	10.274	10.274
Binding of leukemia cell lines	8.05845	8.05845	8.05845	8.05845	8.76167	8.76167	8.76167	8.76167	8.86594	8.86594	8.86594	8.86594	10.3592	10.3592	10.3592	10.3592
Endocytosis by eukaryotic cells	8.27299	8.27299	8.27299	8.27299	9.41361	9.41361	9.41361	9.41361	8.78714	8.78714	8.78714	8.78714	9.57107	9.57107	9.57107	9.57107
Formation of amyloid fibrils	9.89277	9.89277	9.89277	9.89277	9.09277	9.09277	9.09277	9.09277	8.57875	8.57875	8.57875	8.57875	8.40068	8.40068	8.40068	8.40068
Disorder of basal ganglia	8.90821	8.90821	8.90821	8.90821	8.62906	8.62906	8.62906	8.62906	8.30467	8.30467	8.30467	8.30467	10.0084	10.0084	10.0084	10.0084
Neurological signs	9.28531	9.28531	9.28531	9.28531	7.94864	7.94864	7.94864	7.94864	9.14501	9.14501	9.14501	9.14501	9.46719	9.46719	9.46719	9.46719
Engulfment of blood cells	7.77151	7.77151	7.77151	7.77151	9.41914	9.41914	9.41914	9.41914	8.38607	8.38607	8.38607	8.38607	10.1596	10.1596	10.1596	10.1596
Valvulopathy	7.62262	7.62262	7.62262	7.62262	9.20902	9.20902	9.20902	9.20902	9.18856	9.18856	9.18856	9.18856	9.7103	9.7103	9.7103	9.7103
Nodule	9.37903	9.37903	9.37903	9.37903	7.9043	7.9043	7.9043	7.9043	8.30258	8.30258	8.30258	8.30258	10.123	10.123	10.123	10.123
Response of myeloid leukocytes	7.93072	7.93072	7.93072	7.93072	7.67735	7.67735	7.67735	7.67735	9.69243	9.69243	9.69243	9.69243	10.3381	10.3381	10.3381	10.3381
Cell spreading of blood cells	9.11315	9.11315	9.11315	9.11315	8.60649	8.60649	8.60649	8.60649	9.0634	9.0634	9.0634	9.0634	8.8379	8.8379	8.8379	8.8379
Benign solid tumor	7.53642	7.53642	7.53642	7.53642	7.21836	7.21836	7.21836	7.21836	9.24134	9.24134	9.24134	9.24134	11.512	11.512	11.512	11.512
Uptake of lipid	9.38826	9.38826	9.38826	9.38826	8.55855	8.55855	8.55855	8.55855	8.50941	8.50941	8.50941	8.50941	8.99297	8.99297	8.99297	8.99297
Hepatocellular carcinoma	9.13218	9.13218	9.13218	9.13218	7.49703	7.49703	7.49703	7.49703	8.15632	8.15632	8.15632	8.15632	10.5972	10.5972	10.5972	10.5972
Heparin-induced thrombocytopenia	8.80519	8.80519	8.80519	8.80519	9.10081	9.10081	9.10081	9.10081	8.78067	8.78067	8.78067	8.78067	8.66926	8.66926	8.66926	8.66926
Chemotaxis of leukocytes	8.38475	8.38475	8.38475	8.38475	8.12718	8.12718	8.12718	8.12718	8.29683	8.29683	8.29683	8.29683	10.4749	10.4749	10.4749	10.4749
Concentration of cholesterol ester	8.39473	8.39473	8.39473	8.39473	10.1677	10.1677	10.1677	10.1677	8.35563	8.35563	8.35563	8.35563	8.17822	8.17822	8.17822	8.17822
Morphology of blood cells	9.4	9.4	9.4	9.4	8.66411	8.66411	8.66411	8.66411	6.92571	6.92571	6.92571	6.92571	10.0851	10.0851	10.0851	10.0851
Morphology of body cavity	8.22931	8.22931	8.22931	8.22931	7.31926	7.31926	7.31926	7.31926	8.42013	8.42013	8.42013	8.42013	11.0668	11.0668	11.0668	11.0668
Hemophilia	9.48241	9.48241	9.48241	9.48241	8.23917	8.23917	8.23917	8.23917	7.87131	7.87131	7.87131	7.87131	9.3031	9.3031	9.3031	9.3031
Transport of phospholipid	8.93993	8.93993	8.93993	8.93993	8.34602	8.34602	8.34602	8.34602	8.89365	8.89365	8.89365	8.89365	8.68376	8.68376	8.68376	8.68376
Necrosis of kidney	9.67392	9.67392	9.67392	9.67392	7.56536	7.56536	7.56536	7.56536	8.30707	8.30707	8.30707	8.30707	9.12691	9.12691	9.12691	9.12691
Abnormality of heart ventricle	7.62296	7.62296	7.62296	7.62296	8.07836	8.07836	8.07836	8.07836	8.72635	8.72635	8.72635	8.72635	10.1359	10.1359	10.1359	10.1359
Bleeding of skin	9.76099	9.76099	9.76099	9.76099	7.90694	7.90694	7.90694	7.90694	8.53603	8.53603	8.53603	8.53603	8.34262	8.34262	8.34262	8.34262
Hemolytic anemia	8.802	8.802	8.802	8.802	7.54075	7.54075	7.54075	7.54075	8.74621	8.74621	8.74621	8.74621	9.4366	9.4366	9.4366	9.4366
Hypertriglyceridemia	9.11649	9.11649	9.11649	9.11649	7.38006	7.38006	7.38006	7.38006	9.07006	9.07006	9.07006	9.07006	8.85951	8.85951	8.85951	8.85951
Bleeding of brain	8.21922	8.21922	8.21922	8.21922	9.92795	9.92795	9.92795	9.92795	8.17686	8.17686	8.17686	8.17686	7.98477	7.98477	7.98477	7.98477
Quantity of blood vessel	7.43974	7.43974	7.43974	7.43974	9.05752	9.05752	9.05752	9.05752	8.45504	8.45504	8.45504	8.45504	9.32521	9.32521	9.32521	9.32521
Synthesis of nitric oxide	7.809	7.809	7.809	7.809	8.80805	8.80805	8.80805	8.80805	9.02286	9.02286	9.02286	9.02286	8.61706	8.61706	8.61706	8.61706
Infectious lung disease	8.50475	8.50475	8.50475	8.50475	7.57468	7.57468	7.57468	7.57468	8.46909	8.46909	8.46909	8.46909	9.65286	9.65286	9.65286	9.65286
Insulin resistance	7.18137	7.18137	7.18137	7.18137	8.81963	8.81963	8.81963	8.81963	8.32898	8.32898	8.32898	8.32898	9.84325	9.84325	9.84325	9.84325
Hyperlipoproteinemia	11.5161	11.5161	11.5161	11.5161	0	0	0	0	10.4065	10.4065	10.4065	10.4065	12.2095	12.2095	12.2095	12.2095
Abnormal morphology of renal glomerulus	8.17931	8.17931	8.17931	8.17931	7.74534	7.74534	7.74534	7.74534	9.1381	9.1381	9.1381	9.1381	8.8976	8.8976	8.8976	8.8976
Anemia	8.66282	8.66282	8.66282	8.66282	6.82545	6.82545	6.82545	6.82545	8.56419	8.56419	8.56419	8.56419	9.90684	9.90684	9.90684	9.90684
Concentration of sterol	8.68152	8.68152	8.68152	8.68152	7.81856	7.81856	7.81856	7.81856	8.5902	8.5902	8.5902	8.5902	8.79791	8.79791	8.79791	8.79791
Movement of blood platelets	8.41258	8.41258	8.41258	8.41258	8.84313	8.84313	8.84313	8.84313	8.37697	8.37697	8.37697	8.37697	8.21532	8.21532	8.21532	8.21532
Left heart disease	8.17534	8.17534	8.17534	8.17534	7.4682	7.4682	7.4682	7.4682	8.862	8.862	8.862	8.862	9.28831	9.28831	9.28831	9.28831
Cell movement of antigen presenting cells	6.8671	6.8671	6.8671	6.8671	7.88941	7.88941	7.88941	7.88941	9.12773	9.12773	9.12773	9.12773	9.90141	9.90141	9.90141	9.90141
Phagocytosis of blood cells	7.2463	7.2463	7.2463	7.2463	8.8215	8.8215	8.8215	8.8215	7.87593	7.87593	7.87593	7.87593	9.71511	9.71511	9.71511	9.71511
Engulfment of phagocytes	7.00884	7.00884	7.00884	7.00884	8.54258	8.54258	8.54258	8.54258	8.42784	8.42784	8.42784	8.42784	9.6473	9.6473	9.6473	9.6473
Cell movement of dermal cells	8.30769	8.30769	8.30769	8.30769	7.95068	7.95068	7.95068	7.95068	7.32175	7.32175	7.32175	7.32175	9.94895	9.94895	9.94895	9.94895
Staphylococcal infection	8.32312	8.32312	8.32312	8.32312	7.55517	7.55517	7.55517	7.55517	8.28406	8.28406	8.28406	8.28406	9.32345	9.32345	9.32345	9.32345
Liver lesion	8.46943	8.46943	8.46943	8.46943	6.36977	6.36977	6.36977	6.36977	7.81124	7.81124	7.81124	7.81124	10.8281	10.8281	10.8281	10.8281
Migration of granulocytes	8.87589	8.87589	8.87589	8.87589	6.29388	6.29388	6.29388	6.29388	8.81098	8.81098	8.81098	8.81098	9.35418	9.35418	9.35418	9.35418
Permeability of vasculature	7.62977	7.62977	7.62977	7.62977	8.32479	8.32479	8.32479	8.32479	8.40541	8.40541	8.40541	8.40541	8.96896	8.96896	8.96896	8.96896
Abnormal morphology of body cavity	8.11318	8.11318	8.11318	8.11318	6.92326	6.92326	6.92326	6.92326	7.94559	7.94559	7.94559	7.94559	10.3459	10.3459	10.3459	10.3459
Cholangiocarcinoma	7.99916	7.99916	7.99916	7.99916	8.70129	8.70129	8.70129	8.70129	8.80226	8.80226	8.80226	8.80226	7.68088	7.68088	7.68088	7.68088
Quantity of connective tissue	8.68111	8.68111	8.68111	8.68111	6.75144	6.75144	6.75144	6.75144	8.03819	8.03819	8.03819	8.03819	9.66858	9.66858	9.66858	9.66858
Lysis of blood clot	8.24445	8.24445	8.24445	8.24445	8.53908	8.53908	8.53908	8.53908	8.22003	8.22003	8.22003	8.22003	8.10903	8.10903	8.10903	8.10903
Growth of epithelial tissue	6.78439	6.78439	6.78439	6.78439	8.13306	8.13306	8.13306	8.13306	7.1291	7.1291	7.1291	7.1291	11.0328	11.0328	11.0328	11.0328
Cerebral venous thrombosis	8.22242	8.22242	8.22242	8.22242	8.46947	8.46947	8.46947	8.46947	8.20192	8.20192	8.20192	8.20192	8.10877	8.10877	8.10877	8.10877
Hydrolysis of protein fragment	8.97547	8.97547	8.97547	8.97547	7.29086	7.29086	7.29086	7.29086	8.90748	8.90748	8.90748	8.90748	7.81184	7.81184	7.81184	7.81184
Familial hypercholesterolemia	8.50475	8.50475	8.50475	8.50475	7.57468	7.57468	7.57468	7.57468	8.46909	8.46909	8.46909	8.46909	8.30723	8.30723	8.30723	8.30723
Immune response of antigen presenting cells	7.33466	7.33466	7.33466	7.33466	8.90804	8.90804	8.90804	8.90804	7.27004	7.27004	7.27004	7.27004	9.1647	9.1647	9.1647	9.1647
Hydrolysis of protein	8.83852	8.83852	8.83852	8.83852	7.28516	7.28516	7.28516	7.28516	8.76794	8.76794	8.76794	8.76794	7.69527	7.69527	7.69527	7.69527
Intracranial hemorrhage	7.41547	7.41547	7.41547	7.41547	8.97855	8.97855	8.97855	8.97855	8.21343	8.21343	8.21343	8.21343	7.95076	7.95076	7.95076	7.95076
Shape change of blood cells	8.30769	8.30769	8.30769	8.30769	7.95068	7.95068	7.95068	7.95068	8.25562	8.25562	8.25562	8.25562	8.01982	8.01982	8.01982	8.01982
Calcinosis	7.09051	7.09051	7.09051	7.09051	8.6451	8.6451	8.6451	8.6451	8.00562	8.00562	8.00562	8.00562	8.76204	8.76204	8.76204	8.76204
Respiratory distress	7.64057	7.64057	7.64057	7.64057	7.71776	7.71776	7.71776	7.71776	8.29454	8.29454	8.29454	8.29454	8.69256	8.69256	8.69256	8.69256
Engulfment of myeloid cells	6.68352	6.68352	6.68352	6.68352	8.17823	8.17823	8.17823	8.17823	8.11288	8.11288	8.11288	8.11288	9.35944	9.35944	9.35944	9.35944
Size of vascular lesion	8.53056	8.53056	8.53056	8.53056	7.05138	7.05138	7.05138	7.05138	8.48138	8.48138	8.48138	8.48138	8.25854	8.25854	8.25854	8.25854
Chronic renal impairment	7.60101	7.60101	7.60101	7.60101	7.5654	7.5654	7.5654	7.5654	8.30772	8.30772	8.30772	8.30772	8.77996	8.77996	8.77996	8.77996
Infection of respiratory tract	7.07326	7.07326	7.07326	7.07326	7.11733	7.11733	7.11733	7.11733	8.44822	8.44822	8.44822	8.44822	9.60936	9.60936	9.60936	9.60936
Renal thrombotic microangiopathy	7.62986	7.62986	7.62986	7.62986	7.96855	7.96855	7.96855	7.96855	9.13238	9.13238	9.13238	9.13238	7.47443	7.47443	7.47443	7.47443
Quantity of reticulocytes	9.18445	9.18445	9.18445	9.18445	7.25245	7.25245	7.25245	7.25245	7.94522	7.94522	7.94522	7.94522	7.76912	7.76912	7.76912	7.76912
Redistribution of lipid	7.26854	7.26854	7.26854	7.26854	7.6057	7.6057	7.6057	7.6057	8.70772	8.70772	8.70772	8.70772	8.56183	8.56183	8.56183	8.56183
Cell death of kidney cells	8.86082	8.86082	8.86082	8.86082	7.34467	7.34467	7.34467	7.34467	7.52538	7.52538	7.52538	7.52538	8.35525	8.35525	8.35525	8.35525
Female genital tract serous carcinoma	6.49595	6.49595	6.49595	6.49595	6.19914	6.19914	6.19914	6.19914	7.60022	7.60022	7.60022	7.60022	11.7555	11.7555	11.7555	11.7555
Pelvic serous carcinoma	6.49595	6.49595	6.49595	6.49595	6.19914	6.19914	6.19914	6.19914	7.60022	7.60022	7.60022	7.60022	11.7555	11.7555	11.7555	11.7555
Homeostasis of retina	7.92457	7.92457	7.92457	7.92457	8.30889	8.30889	8.30889	8.30889	6.5452	6.5452	6.5452	6.5452	9.14395	9.14395	9.14395	9.14395
Metabolism of cholesterol	8.84018	8.84018	8.84018	8.84018	7.5735	7.5735	7.5735	7.5735	7.85078	7.85078	7.85078	7.85078	7.61744	7.61744	7.61744	7.61744
Chronic renal failure	7.49833	7.49833	7.49833	7.49833	7.40614	7.40614	7.40614	7.40614	8.22946	8.22946	8.22946	8.22946	8.7379	8.7379	8.7379	8.7379
Thrombotic microangiopathy	8.23521	8.23521	8.23521	8.23521	7.33821	7.33821	7.33821	7.33821	8.19969	8.19969	8.19969	8.19969	8.03847	8.03847	8.03847	8.03847
Activation of blood platelets	8.33011	8.33011	8.33011	8.33011	6.25594	6.25594	6.25594	6.25594	8.27495	8.27495	8.27495	8.27495	8.93084	8.93084	8.93084	8.93084
Severe sepsis	7.33122	7.33122	7.33122	7.33122	7.79543	7.79543	7.79543	7.79543	8.41276	8.41276	8.41276	8.41276	8.21979	8.21979	8.21979	8.21979
Binding of polysaccharide	7.34648	7.34648	7.34648	7.34648	6.79176	6.79176	6.79176	6.79176	8.35193	8.35193	8.35193	8.35193	9.21248	9.21248	9.21248	9.21248
Acute phase reaction	7.0729	7.0729	7.0729	7.0729	7.36451	7.36451	7.36451	7.36451	8.68473	8.68473	8.68473	8.68473	8.55587	8.55587	8.55587	8.55587
Left ventricular dysfunction	7.65288	7.65288	7.65288	7.65288	6.92106	6.92106	6.92106	6.92106	8.33412	8.33412	8.33412	8.33412	8.76973	8.76973	8.76973	8.76973
Binding of gonadal cell lines	6.7772	6.7772	6.7772	6.7772	8.34602	8.34602	8.34602	8.34602	7.79447	7.79447	7.79447	7.79447	8.68376	8.68376	8.68376	8.68376
Homing of cells	10.0253	10.0253	10.0253	10.0253	0	0	0	0	9.90233	9.90233	9.90233	9.90233	11.6507	11.6507	11.6507	11.6507
Interaction of mononuclear leukocytes	7.80793	7.80793	7.80793	7.80793	6.32398	6.32398	6.32398	6.32398	8.49911	8.49911	8.49911	8.49911	8.94344	8.94344	8.94344	8.94344
Phagocytosis of myeloid cells	6.46506	6.46506	6.46506	6.46506	7.93253	7.93253	7.93253	7.93253	7.92252	7.92252	7.92252	7.92252	9.21366	9.21366	9.21366	9.21366
Systemic amyloidosis	8.19753	8.19753	8.19753	8.19753	6.93737	6.93737	6.93737	6.93737	6.62323	6.62323	6.62323	6.62323	9.65489	9.65489	9.65489	9.65489
Opsonization of cells	7.80091	7.80091	7.80091	7.80091	8.04747	8.04747	8.04747	8.04747	7.78046	7.78046	7.78046	7.78046	7.6875	7.6875	7.6875	7.6875
Hemophilia A	7.78871	7.78871	7.78871	7.78871	8.08233	8.08233	8.08233	8.08233	7.76437	7.76437	7.76437	7.76437	7.65379	7.65379	7.65379	7.65379
Catabolism of hydrogen peroxide	9.31963	9.31963	9.31963	9.31963	6.57416	6.57416	6.57416	6.57416	7.73334	7.73334	7.73334	7.73334	7.60575	7.60575	7.60575	7.60575
Familial psychiatric disease	7.83969	7.83969	7.83969	7.83969	7.23034	7.23034	7.23034	7.23034	6.86775	6.86775	6.86775	6.86775	9.25331	9.25331	9.25331	9.25331
Infection by Staphylococcus aureus	7.7515	7.7515	7.7515	7.7515	6.91325	6.91325	6.91325	6.91325	7.71625	7.71625	7.71625	7.71625	8.80294	8.80294	8.80294	8.80294
Migration of myeloid cells	8.01384	8.01384	8.01384	8.01384	6.49442	6.49442	6.49442	6.49442	7.94771	7.94771	7.94771	7.94771	8.39974	8.39974	8.39974	8.39974
Secretion of molecule	7.05088	7.05088	7.05088	7.05088	7.69978	7.69978	7.69978	7.69978	7.46253	7.46253	7.46253	7.46253	8.55569	8.55569	8.55569	8.55569
Deposition of amyloid fibrils	7.63051	7.63051	7.63051	7.63051	8.01327	8.01327	8.01327	8.01327	7.59884	7.59884	7.59884	7.59884	7.45509	7.45509	7.45509	7.45509
Hereditary factor I deficiency	7.62584	7.62584	7.62584	7.62584	7.82393	7.82393	7.82393	7.82393	7.6094	7.6094	7.6094	7.6094	7.53467	7.53467	7.53467	7.53467
Familial venous thrombosis	7.62584	7.62584	7.62584	7.62584	7.82393	7.82393	7.82393	7.82393	7.6094	7.6094	7.6094	7.6094	7.53467	7.53467	7.53467	7.53467
Release of cholesterol	7.58916	7.58916	7.58916	7.58916	7.88227	7.88227	7.88227	7.88227	7.56486	7.56486	7.56486	7.56486	7.45448	7.45448	7.45448	7.45448
Bleeding of tissue	7.85652	7.85652	7.85652	7.85652	7.13852	7.13852	7.13852	7.13852	7.81779	7.81779	7.81779	7.81779	7.64213	7.64213	7.64213	7.64213
Procedure complication	7.89852	7.89852	7.89852	7.89852	7.90917	7.90917	7.90917	7.90917	7.09447	7.09447	7.09447	7.09447	7.53508	7.53508	7.53508	7.53508
Migration of keratinocytes	6.91098	6.91098	6.91098	6.91098	8.46588	8.46588	8.46588	8.46588	6.86989	6.86989	6.86989	6.86989	7.66495	7.66495	7.66495	7.66495
Binding of extracellular matrix	6.94352	6.94352	6.94352	6.94352	7.4808	7.4808	7.4808	7.4808	7.8443	7.8443	7.8443	7.8443	7.62479	7.62479	7.62479	7.62479
Cell death of phagocytes	6.51547	6.51547	6.51547	6.51547	7.28289	7.28289	7.28289	7.28289	7.12264	7.12264	7.12264	7.12264	8.90672	8.90672	8.90672	8.90672
Activation of granulocytes	6.71679	6.71679	6.71679	6.71679	7.28716	7.28716	7.28716	7.28716	7.5437	7.5437	7.5437	7.5437	8.20024	8.20024	8.20024	8.20024
Morphology of cardiovascular system	7.0607	7.0607	7.0607	7.0607	6.34817	6.34817	6.34817	6.34817	7.36211	7.36211	7.36211	7.36211	8.96371	8.96371	8.96371	8.96371
Quantity of Ca2+	7.88378	7.88378	7.88378	7.88378	7.23147	7.23147	7.23147	7.23147	6.68577	6.68577	6.68577	6.68577	7.9267	7.9267	7.9267	7.9267
Size of atherosclerotic lesion	7.8704	7.8704	7.8704	7.8704	6.35978	6.35978	6.35978	6.35978	7.82511	7.82511	7.82511	7.82511	7.61987	7.61987	7.61987	7.61987
Distribution of lipid	6.74136	6.74136	6.74136	6.74136	7.11843	7.11843	7.11843	7.11843	7.94956	7.94956	7.94956	7.94956	7.789	7.789	7.789	7.789
Adhesion of cell-associated matrix	7.03656	7.03656	7.03656	7.03656	6.51083	6.51083	6.51083	6.51083	8.00928	8.00928	8.00928	8.00928	7.80315	7.80315	7.80315	7.80315
Proteinuria	7.07435	7.07435	7.07435	7.07435	7.00326	7.00326	7.00326	7.00326	7.01565	7.01565	7.01565	7.01565	8.25658	8.25658	8.25658	8.25658
Recruitment of myeloid cells	6.74489	6.74489	6.74489	6.74489	6.90329	6.90329	6.90329	6.90329	7.32109	7.32109	7.32109	7.32109	8.30625	8.30625	8.30625	8.30625
Quantity of steroid	7.46	7.46	7.46	7.46	7.01456	7.01456	7.01456	7.01456	7.36152	7.36152	7.36152	7.36152	7.42619	7.42619	7.42619	7.42619
Acute kidney injury	6.95239	6.95239	6.95239	6.95239	6.43449	6.43449	6.43449	6.43449	6.91124	6.91124	6.91124	6.91124	8.73616	8.73616	8.73616	8.73616
Systemic inflammatory response syndrome	6.48636	6.48636	6.48636	6.48636	6.81945	6.81945	6.81945	6.81945	7.79171	7.79171	7.79171	7.79171	7.64753	7.64753	7.64753	7.64753
Primary genetic hyperlipidemia	10.0469	10.0469	10.0469	10.0469	0	0	0	0	8.79423	8.79423	8.79423	8.79423	9.78613	9.78613	9.78613	9.78613
Infection of mammalia	6.89306	6.89306	6.89306	6.89306	6.4463	6.4463	6.4463	6.4463	6.82204	6.82204	6.82204	6.82204	8.40902	8.40902	8.40902	8.40902
Concentration of cholesterol	7.3287	7.3287	7.3287	7.3287	6.41635	6.41635	6.41635	6.41635	7.24905	7.24905	7.24905	7.24905	7.48297	7.48297	7.48297	7.48297
Hereditary kidney disease	6.57286	6.57286	6.57286	6.57286	6.91475	6.91475	6.91475	6.91475	7.06633	7.06633	7.06633	7.06633	7.85476	7.85476	7.85476	7.85476
Lupus erythematosus	6.64194	6.64194	6.64194	6.64194	6.49315	6.49315	6.49315	6.49315	6.5602	6.5602	6.5602	6.5602	8.40748	8.40748	8.40748	8.40748
Homing of leukocytes	8.50661	8.50661	8.50661	8.50661	0	0	0	0	8.41583	8.41583	8.41583	8.41583	10.5464	10.5464	10.5464	10.5464
Lymphohematopoietic cancer	9.26198	9.26198	9.26198	9.26198	0	0	0	0	7.73131	7.73131	7.73131	7.73131	10.4617	10.4617	10.4617	10.4617
Migration of neutrophils	8.59183	8.59183	8.59183	8.59183	0	0	0	0	8.53328	8.53328	8.53328	8.53328	10.0681	10.0681	10.0681	10.0681
Hematologic cancer	9.06102	9.06102	9.06102	9.06102	0	0	0	0	7.5483	7.5483	7.5483	7.5483	10.2606	10.2606	10.2606	10.2606
Lymphohematopoietic neoplasia	9.06459	9.06459	9.06459	9.06459	0	0	0	0	7.5528	7.5528	7.5528	7.5528	10.2256	10.2256	10.2256	10.2256
Lichen planus	8.05476	8.05476	8.05476	8.05476	7.53702	7.53702	7.53702	7.53702	0	0	0	0	11.0184	11.0184	11.0184	11.0184
Hematological or lymphatic system tumor	8.9032	8.9032	8.9032	8.9032	0	0	0	0	7.40648	7.40648	7.40648	7.40648	10.0485	10.0485	10.0485	10.0485
Migration of smooth muscle cells	8.08644	8.08644	8.08644	8.08644	0	0	0	0	9.65345	9.65345	9.65345	9.65345	8.51903	8.51903	8.51903	8.51903
Hematopoietic neoplasm	8.84749	8.84749	8.84749	8.84749	0	0	0	0	7.35543	7.35543	7.35543	7.35543	10.0065	10.0065	10.0065	10.0065
Abnormality of skin morphology	7.44067	7.44067	7.44067	7.44067	7.24289	7.24289	7.24289	7.24289	0	0	0	0	11.3089	11.3089	11.3089	11.3089
Wound	0	0	0	0	7.83709	7.83709	7.83709	7.83709	6.98974	6.98974	6.98974	6.98974	11.1548	11.1548	11.1548	11.1548
Attachment of cells	0	0	0	0	7.70742	7.70742	7.70742	7.70742	8.80395	8.80395	8.80395	8.80395	9.44326	9.44326	9.44326	9.44326
Myeloid or lymphoid neoplasm	8.81982	8.81982	8.81982	8.81982	0	0	0	0	7.04498	7.04498	7.04498	7.04498	9.99539	9.99539	9.99539	9.99539
Migration of vascular cells	7.35073	7.35073	7.35073	7.35073	0	0	0	0	9.39137	9.39137	9.39137	9.39137	9.01672	9.01672	9.01672	9.01672
Non-ST elevation myocardial infarction	7.72551	7.72551	7.72551	7.72551	0	0	0	0	9.0787	9.0787	9.0787	9.0787	8.91555	8.91555	8.91555	8.91555
Breast or ovarian cancer	7.6046	7.6046	7.6046	7.6046	0	0	0	0	7.31868	7.31868	7.31868	7.31868	10.7945	10.7945	10.7945	10.7945
Assembly of cells	0	0	0	0	0	0	0	0	11.6731	11.6731	11.6731	11.6731	13.9956	13.9956	13.9956	13.9956
Development of endothelial tissue	0	0	0	0	0	0	0	0	11.6731	11.6731	11.6731	11.6731	13.9956	13.9956	13.9956	13.9956
Multiple cancers	7.67179	7.67179	7.67179	7.67179	0	0	0	0	7.09981	7.09981	7.09981	7.09981	10.8086	10.8086	10.8086	10.8086
Neoplasia of blood cells	8.85987	8.85987	8.85987	8.85987	0	0	0	0	7.36273	7.36273	7.36273	7.36273	9.13966	9.13966	9.13966	9.13966
Diabetic complication	0	0	0	0	6.32021	6.32021	6.32021	6.32021	10.3287	10.3287	10.3287	10.3287	8.63489	8.63489	8.63489	8.63489
Phagocytosis of phagocytes	0	0	0	0	7.79182	7.79182	7.79182	7.79182	7.77528	7.77528	7.77528	7.77528	9.04741	9.04741	9.04741	9.04741
Lymphatic system tumor	7.93154	7.93154	7.93154	7.93154	0	0	0	0	7.08231	7.08231	7.08231	7.08231	9.52296	9.52296	9.52296	9.52296
Edema	0	0	0	0	8.58973	8.58973	8.58973	8.58973	8.04982	8.04982	8.04982	8.04982	7.64687	7.64687	7.64687	7.64687
Response of granulocytes	6.63113	6.63113	6.63113	6.63113	0	0	0	0	8.45165	8.45165	8.45165	8.45165	9.17978	9.17978	9.17978	9.17978
Lymphoid cancer	7.8703	7.8703	7.8703	7.8703	0	0	0	0	6.72555	6.72555	6.72555	6.72555	9.47607	9.47607	9.47607	9.47607
Cell death of endothelial cells	6.90622	6.90622	6.90622	6.90622	0	0	0	0	7.56578	7.56578	7.56578	7.56578	9.51685	9.51685	9.51685	9.51685
Disseminated intravascular coagulation	8.50873	8.50873	8.50873	8.50873	6.91281	6.91281	6.91281	6.91281	8.48426	8.48426	8.48426	8.48426	0	0	0	0
Necrosis of epithelial tissue	7.18584	7.18584	7.18584	7.18584	0	0	0	0	6.61073	6.61073	6.61073	6.61073	10.0989	10.0989	10.0989	10.0989
Damage of endothelial cells	0	0	0	0	6.25851	6.25851	6.25851	6.25851	8.84314	8.84314	8.84314	8.84314	8.69704	8.69704	8.69704	8.69704
Cutaneous melanoma	7.71653	7.71653	7.71653	7.71653	0	0	0	0	7.2704	7.2704	7.2704	7.2704	8.80883	8.80883	8.80883	8.80883
Migration of dermal cells	7.36114	7.36114	7.36114	7.36114	0	0	0	0	7.31642	7.31642	7.31642	7.31642	9.08437	9.08437	9.08437	9.08437
ST-elevation myocardial infarction	6.92007	6.92007	6.92007	6.92007	0	0	0	0	7.95392	7.95392	7.95392	7.95392	8.85951	8.85951	8.85951	8.85951
Neoplasia of leukocytes	7.94664	7.94664	7.94664	7.94664	0	0	0	0	7.0932	7.0932	7.0932	7.0932	8.65174	8.65174	8.65174	8.65174
Atypical hemolytic uremic syndrome	7.23314	7.23314	7.23314	7.23314	7.52526	7.52526	7.52526	7.52526	8.8796	8.8796	8.8796	8.8796	0	0	0	0
Lymphocytic cancer	7.6975	7.6975	7.6975	7.6975	0	0	0	0	6.56547	6.56547	6.56547	6.56547	9.30181	9.30181	9.30181	9.30181
Malignant lymphocytic neoplasm	7.6975	7.6975	7.6975	7.6975	0	0	0	0	6.56547	6.56547	6.56547	6.56547	9.30181	9.30181	9.30181	9.30181
Concentration of triacylglycerol	7.2175	7.2175	7.2175	7.2175	0	0	0	0	8.33797	8.33797	8.33797	8.33797	7.93059	7.93059	7.93059	7.93059
Binding of bacteria	7.32733	7.32733	7.32733	7.32733	7.75054	7.75054	7.75054	7.75054	0	0	0	0	8.32507	8.32507	8.32507	8.32507
Metabolism of terpenoid	8.38084	8.38084	8.38084	8.38084	7.3364	7.3364	7.3364	7.3364	7.64816	7.64816	7.64816	7.64816	0	0	0	0
Respiratory burst	7.60806	7.60806	7.60806	7.60806	8.15443	8.15443	8.15443	8.15443	7.56305	7.56305	7.56305	7.56305	0	0	0	0
Area of lesion	9.37899	9.37899	9.37899	9.37899	6.7092	6.7092	6.7092	6.7092	7.21391	7.21391	7.21391	7.21391	0	0	0	0
Lymphoreticular neoplasm	7.6908	7.6908	7.6908	7.6908	0	0	0	0	7.46333	7.46333	7.46333	7.46333	7.96706	7.96706	7.96706	7.96706
Eosinophilic inflammation	6.94846	6.94846	6.94846	6.94846	0	0	0	0	6.89835	6.89835	6.89835	6.89835	9.26083	9.26083	9.26083	9.26083
Quantity of hdl cholesterol in blood	8.70585	8.70585	8.70585	8.70585	6.86951	6.86951	6.86951	6.86951	7.51705	7.51705	7.51705	7.51705	0	0	0	0
Activation of neuroglia	6.94037	6.94037	6.94037	6.94037	8.45653	8.45653	8.45653	8.45653	7.66425	7.66425	7.66425	7.66425	0	0	0	0
Formation of fibrils	6.7765	6.7765	6.7765	6.7765	8.38923	8.38923	8.38923	8.38923	7.88097	7.88097	7.88097	7.88097	0	0	0	0
Ovarian serous tumor	6.93345	6.93345	6.93345	6.93345	0	0	0	0	6.82703	6.82703	6.82703	6.82703	9.19848	9.19848	9.19848	9.19848
Damage of central nervous system	7.36572	7.36572	7.36572	7.36572	8.28674	8.28674	8.28674	8.28674	7.29082	7.29082	7.29082	7.29082	0	0	0	0
Area of atherosclerotic lesion	9.19558	9.19558	9.19558	9.19558	7.04851	7.04851	7.04851	7.04851	6.64083	6.64083	6.64083	6.64083	0	0	0	0
Apoptosis of phagocytes	0	0	0	0	7.22261	7.22261	7.22261	7.22261	7.1803	7.1803	7.1803	7.1803	8.37523	8.37523	8.37523	8.37523
Metabolism of lipoprotein	8.04457	8.04457	8.04457	8.04457	6.81016	6.81016	6.81016	6.81016	0	0	0	0	7.88837	7.88837	7.88837	7.88837
Portal vein thrombosis	7.45319	7.45319	7.45319	7.45319	7.69926	7.69926	7.69926	7.69926	7.43278	7.43278	7.43278	7.43278	0	0	0	0
Right ventricular dysfunction	7.45319	7.45319	7.45319	7.45319	7.69926	7.69926	7.69926	7.69926	7.43278	7.43278	7.43278	7.43278	0	0	0	0
Abnormal morphology of abdomen	7.21574	7.21574	7.21574	7.21574	0	0	0	0	7.09363	7.09363	7.09363	7.09363	8.2688	8.2688	8.2688	8.2688
Cell movement of embryonic cell lines	6.61822	6.61822	6.61822	6.61822	0	0	0	0	7.31764	7.31764	7.31764	7.31764	8.60015	8.60015	8.60015	8.60015
Thyroid follicular adenoma	6.92256	6.92256	6.92256	6.92256	7.21368	7.21368	7.21368	7.21368	0	0	0	0	8.37369	8.37369	8.37369	8.37369
Injury of nervous system	7.2032	7.2032	7.2032	7.2032	8.11863	8.11863	8.11863	8.11863	7.12879	7.12879	7.12879	7.12879	0	0	0	0
Cell spreading of blood platelets	7.36166	7.36166	7.36166	7.36166	7.74287	7.74287	7.74287	7.74287	7.33013	7.33013	7.33013	7.33013	0	0	0	0
Allergic pulmonary eosinophilia	7.03592	7.03592	7.03592	7.03592	0	0	0	0	7.00457	7.00457	7.00457	7.00457	8.12578	8.12578	8.12578	8.12578
Damage of endothelial tissue	0	0	0	0	6.29473	6.29473	6.29473	6.29473	7.5753	7.5753	7.5753	7.5753	8.295	8.295	8.295	8.295
Steroid metabolism	7.79012	7.79012	7.79012	7.79012	7.26509	7.26509	7.26509	7.26509	7.04873	7.04873	7.04873	7.04873	0	0	0	0
Morphology of vessel	7.70999	7.70999	7.70999	7.70999	6.67614	6.67614	6.67614	6.67614	7.63159	7.63159	7.63159	7.63159	0	0	0	0
Synthesis of fatty acid	7.02331	7.02331	7.02331	7.02331	7.99311	7.99311	7.99311	7.99311	6.9447	6.9447	6.9447	6.9447	0	0	0	0
Binding of endothelial cell lines	6.63983	6.63983	6.63983	6.63983	0	0	0	0	7.64114	7.64114	7.64114	7.64114	7.45124	7.45124	7.45124	7.45124
Metabolism of acylglycerol	8.40805	8.40805	8.40805	8.40805	6.58953	6.58953	6.58953	6.58953	6.7191	6.7191	6.7191	6.7191	0	0	0	0
Bile duct adenocarcinoma	7.38222	7.38222	7.38222	7.38222	6.31666	6.31666	6.31666	6.31666	7.95434	7.95434	7.95434	7.95434	0	0	0	0
Acute respiratory distress syndrome	7.33446	7.33446	7.33446	7.33446	6.96493	6.96493	6.96493	6.96493	7.2867	7.2867	7.2867	7.2867	0	0	0	0
Intracranial thrombosis	7.0729	7.0729	7.0729	7.0729	7.36451	7.36451	7.36451	7.36451	7.04873	7.04873	7.04873	7.04873	0	0	0	0
Formation of thrombus	7.38604	7.38604	7.38604	7.38604	6.71791	6.71791	6.71791	6.71791	7.34768	7.34768	7.34768	7.34768	0	0	0	0
Damage of nervous system	6.85907	6.85907	6.85907	6.85907	7.7924	7.7924	7.7924	7.7924	6.78338	6.78338	6.78338	6.78338	0	0	0	0
Apoptosis of kidney	7.2448	7.2448	7.2448	7.2448	6.96103	6.96103	6.96103	6.96103	7.19421	7.19421	7.19421	7.19421	0	0	0	0
Autosomal dominant bleeding disorder	6.64726	6.64726	6.64726	6.64726	0	0	0	0	6.62323	6.62323	6.62323	6.62323	8.04108	8.04108	8.04108	8.04108
Injury of central nervous system	6.82954	6.82954	6.82954	6.82954	7.70093	7.70093	7.70093	7.70093	6.75872	6.75872	6.75872	6.75872	0	0	0	0
Metabolism of hydrogen peroxide	7.71265	7.71265	7.71265	7.71265	6.70884	6.70884	6.70884	6.70884	6.84583	6.84583	6.84583	6.84583	0	0	0	0
Homeostasis of lipid	8.08418	8.08418	8.08418	8.08418	6.55265	6.55265	6.55265	6.55265	6.54311	6.54311	6.54311	6.54311	0	0	0	0
Pulmonary embolism	6.94871	6.94871	6.94871	6.94871	7.28435	7.28435	7.28435	7.28435	6.92093	6.92093	6.92093	6.92093	0	0	0	0
Generation of reactive oxygen species	7.22418	7.22418	7.22418	7.22418	6.68222	6.68222	6.68222	6.68222	7.15468	7.15468	7.15468	7.15468	0	0	0	0
Disorder of blood pressure	6.64039	6.64039	6.64039	6.64039	6.12779	6.12779	6.12779	6.12779	0	0	0	0	8.25986	8.25986	8.25986	8.25986
Epidermolytic hyperkeratosis	6.93117	6.93117	6.93117	6.93117	7.12879	7.12879	7.12879	7.12879	6.91477	6.91477	6.91477	6.91477	0	0	0	0
Recurrent venous thromboembolism	6.93117	6.93117	6.93117	6.93117	7.12879	7.12879	7.12879	7.12879	6.91477	6.91477	6.91477	6.91477	0	0	0	0
Prostatic intraepithelial tumor	6.76698	6.76698	6.76698	6.76698	7.30158	7.30158	7.30158	7.30158	6.72301	6.72301	6.72301	6.72301	0	0	0	0
Adhesion of tumor cells	6.67195	6.67195	6.67195	6.67195	7.04851	7.04851	7.04851	7.04851	6.64083	6.64083	6.64083	6.64083	0	0	0	0
Shape change of leukocytes	6.95239	6.95239	6.95239	6.95239	6.43449	6.43449	6.43449	6.43449	6.91124	6.91124	6.91124	6.91124	0	0	0	0
Necrosis	7.91049	7.91049	7.91049	7.91049	0	0	0	0	0	0	0	0	11.0725	11.0725	11.0725	11.0725
Chronic skin disorder	0	0	0	0	7.19329	7.19329	7.19329	7.19329	0	0	0	0	10.4906	10.4906	10.4906	10.4906
Binding of antigen presenting cells	0	0	0	0	8.77176	8.77176	8.77176	8.77176	0	0	0	0	8.8976	8.8976	8.8976	8.8976
Binding of macrophages	0	0	0	0	9.05752	9.05752	9.05752	9.05752	0	0	0	0	8.24693	8.24693	8.24693	8.24693
Advanced malignant tumor	0	0	0	0	0	0	0	0	7.1004	7.1004	7.1004	7.1004	10.0901	10.0901	10.0901	10.0901
Colitis	0	0	0	0	6.51712	6.51712	6.51712	6.51712	0	0	0	0	10.0936	10.0936	10.0936	10.0936
Metastasis	0	0	0	0	0	0	0	0	6.69644	6.69644	6.69644	6.69644	9.75921	9.75921	9.75921	9.75921
Tumorigenesis of reproductive tract	7.12128	7.12128	7.12128	7.12128	0	0	0	0	0	0	0	0	9.32654	9.32654	9.32654	9.32654
Immune response of neutrophils	0	0	0	0	0	0	0	0	7.78029	7.78029	7.78029	7.78029	8.58761	8.58761	8.58761	8.58761
Reorganization of cytoskeleton	8.96503	8.96503	8.96503	8.96503	7.39114	7.39114	7.39114	7.39114	0	0	0	0	0	0	0	0
Female genital neoplasm	7.06804	7.06804	7.06804	7.06804	0	0	0	0	0	0	0	0	9.26322	9.26322	9.26322	9.26322
Infection by Bacilli	7.28199	7.28199	7.28199	7.28199	0	0	0	0	0	0	0	0	8.9901	8.9901	8.9901	8.9901
Enteritis	0	0	0	0	6.16326	6.16326	6.16326	6.16326	0	0	0	0	10.0174	10.0174	10.0174	10.0174
Disorder of pregnancy	7.06079	7.06079	7.06079	7.06079	0	0	0	0	0	0	0	0	9.09773	9.09773	9.09773	9.09773
Hepato-pancreato-biliary cancer	6.61513	6.61513	6.61513	6.61513	0	0	0	0	0	0	0	0	9.4814	9.4814	9.4814	9.4814
Binding of muscle cells	0	0	0	0	7.65765	7.65765	7.65765	7.65765	0	0	0	0	8.4016	8.4016	8.4016	8.4016
Atherosclerosis of aortic sinus	8.00599	8.00599	8.00599	8.00599	0	0	0	0	7.9816	7.9816	7.9816	7.9816	0	0	0	0
Morphology of kidney	0	0	0	0	0	0	0	0	8.13108	8.13108	8.13108	8.13108	7.77123	7.77123	7.77123	7.77123
Organization of filaments	8.26567	8.26567	8.26567	8.26567	7.54944	7.54944	7.54944	7.54944	0	0	0	0	0	0	0	0
Formation of plaque	8.71309	8.71309	8.71309	8.71309	0	0	0	0	7.04873	7.04873	7.04873	7.04873	0	0	0	0
Cell death of immune cells	0	0	0	0	0	0	0	0	6.58272	6.58272	6.58272	6.58272	9.00625	9.00625	9.00625	9.00625
Intra-abdominal thrombosis	7.78871	7.78871	7.78871	7.78871	0	0	0	0	7.76437	7.76437	7.76437	7.76437	0	0	0	0
Metabolism of triacylglycerol	8.23137	8.23137	8.23137	8.23137	0	0	0	0	7.25193	7.25193	7.25193	7.25193	0	0	0	0
Collagen disease	0	0	0	0	7.5547	7.5547	7.5547	7.5547	7.92423	7.92423	7.92423	7.92423	0	0	0	0
Extraadrenal retroperitoneal tumor	0	0	0	0	0	0	0	0	6.73543	6.73543	6.73543	6.73543	8.72133	8.72133	8.72133	8.72133
Tumorigenesis of lymphocytes	7.65146	7.65146	7.65146	7.65146	0	0	0	0	0	0	0	0	7.75544	7.75544	7.75544	7.75544
Benign cold thyroid nodule	0	0	0	0	7.88227	7.88227	7.88227	7.88227	0	0	0	0	7.45448	7.45448	7.45448	7.45448
Glaucoma	0	0	0	0	0	0	0	0	6.82786	6.82786	6.82786	6.82786	8.50172	8.50172	8.50172	8.50172
Organization of actin cytoskeleton	7.48219	7.48219	7.48219	7.48219	7.7173	7.7173	7.7173	7.7173	0	0	0	0	0	0	0	0
Apoptosis of endothelial cells	0	0	0	0	0	0	0	0	6.79519	6.79519	6.79519	6.79519	8.00563	8.00563	8.00563	8.00563
Quantity of ldl cholesterol in blood	7.39447	7.39447	7.39447	7.39447	0	0	0	0	7.35946	7.35946	7.35946	7.35946	0	0	0	0
Fibrosis of liver	0	0	0	0	6.7341	6.7341	6.7341	6.7341	0	0	0	0	7.97664	7.97664	7.97664	7.97664
Cell spreading of tumor cell lines	0	0	0	0	0	0	0	0	7.01609	7.01609	7.01609	7.01609	7.68807	7.68807	7.68807	7.68807
Activation of endothelial cells	6.92007	6.92007	6.92007	6.92007	0	0	0	0	0	0	0	0	7.76271	7.76271	7.76271	7.76271
Proliferation of smooth muscle cells	0	0	0	0	0	0	0	0	7.18368	7.18368	7.18368	7.18368	7.49627	7.49627	7.49627	7.49627
End stage renal disease	0	0	0	0	0	0	0	0	7.05614	7.05614	7.05614	7.05614	7.62282	7.62282	7.62282	7.62282
Fredrickson hyperlipoproteinemia	8.02902	8.02902	8.02902	8.02902	0	0	0	0	6.63442	6.63442	6.63442	6.63442	0	0	0	0
Production of superoxide	6.57564	6.57564	6.57564	6.57564	8.05258	8.05258	8.05258	8.05258	0	0	0	0	0	0	0	0
Transport of sterol	14.6103	14.6103	14.6103	14.6103	0	0	0	0	0	0	0	0	0	0	0	0
Neutralization of polysaccharide	0	0	0	0	6.29134	6.29134	6.29134	6.29134	0	0	0	0	8.10877	8.10877	8.10877	8.10877
Allergic asthma	6.7772	6.7772	6.7772	6.7772	0	0	0	0	0	0	0	0	7.60392	7.60392	7.60392	7.60392
Morphology of blood vessel	7.1881	7.1881	7.1881	7.1881	0	0	0	0	7.11619	7.11619	7.11619	7.11619	0	0	0	0
Mesenteric thrombosis	7.15661	7.15661	7.15661	7.15661	0	0	0	0	7.13625	7.13625	7.13625	7.13625	0	0	0	0
Phagocytosis of neutrophils	0	0	0	0	0	0	0	0	6.63104	6.63104	6.63104	6.63104	7.58022	7.58022	7.58022	7.58022
Autoimmune pancreatitis	0	0	0	0	6.46427	6.46427	6.46427	6.46427	0	0	0	0	7.47443	7.47443	7.47443	7.47443
Activation of microglia	0	0	0	0	7.27574	7.27574	7.27574	7.27574	6.62099	6.62099	6.62099	6.62099	0	0	0	0
Formation of focal adhesions	0	0	0	0	6.85643	6.85643	6.85643	6.85643	7.00266	7.00266	7.00266	7.00266	0	0	0	0
Ischemic complication	6.89783	6.89783	6.89783	6.89783	0	0	0	0	6.8775	6.8775	6.8775	6.8775	0	0	0	0
Brain damage	6.47322	6.47322	6.47322	6.47322	7.30132	7.30132	7.30132	7.30132	0	0	0	0	0	0	0	0
Cell movement of fibroblasts	6.47919	6.47919	6.47919	6.47919	7.18134	7.18134	7.18134	7.18134	0	0	0	0	0	0	0	0
Cell movement of monocytes	6.86947	6.86947	6.86947	6.86947	6.74693	6.74693	6.74693	6.74693	0	0	0	0	0	0	0	0
Reorganization of actin cytoskeleton	7.2184	7.2184	7.2184	7.2184	6.18159	6.18159	6.18159	6.18159	0	0	0	0	0	0	0	0
Peripheral arterial disease	7.0714	7.0714	7.0714	7.0714	6.32398	6.32398	6.32398	6.32398	0	0	0	0	0	0	0	0
Binding of smooth muscle cells	6.48636	6.48636	6.48636	6.48636	6.81945	6.81945	6.81945	6.81945	0	0	0	0	0	0	0	0
Adhesion of leukemia cell lines	0	0	0	0	6.20245	6.20245	6.20245	6.20245	6.55414	6.55414	6.55414	6.55414	0	0	0	0
Ovarian tumor	0	0	0	0	0	0	0	0	0	0	0	0	12.3862	12.3862	12.3862	12.3862
Exanthem of skin	0	0	0	0	0	0	0	0	0	0	0	0	9.25794	9.25794	9.25794	9.25794
Maculopathy	0	0	0	0	0	0	0	0	0	0	0	0	9.22314	9.22314	9.22314	9.22314
Cell death of blood cells	0	0	0	0	0	0	0	0	0	0	0	0	9.17594	9.17594	9.17594	9.17594
Cell movement of tumor cell lines	0	0	0	0	0	0	0	0	0	0	0	0	8.91296	8.91296	8.91296	8.91296
Plaque psoriasis	0	0	0	0	0	0	0	0	0	0	0	0	8.89383	8.89383	8.89383	8.89383
Breast or gynecological cancer	0	0	0	0	0	0	0	0	0	0	0	0	8.87379	8.87379	8.87379	8.87379
Invasion of cells	0	0	0	0	0	0	0	0	0	0	0	0	8.83795	8.83795	8.83795	8.83795
Cell proliferation of vascular endothelial cells	0	0	0	0	0	0	0	0	0	0	0	0	8.83252	8.83252	8.83252	8.83252
Eosinophilia	0	0	0	0	0	0	0	0	0	0	0	0	8.80618	8.80618	8.80618	8.80618
Hepatobiliary neoplasm	0	0	0	0	0	0	0	0	0	0	0	0	8.69833	8.69833	8.69833	8.69833
Diabetic nephropathy	0	0	0	0	0	0	0	0	8.6471	8.6471	8.6471	8.6471	0	0	0	0
Hepatobiliary system cancer	0	0	0	0	0	0	0	0	0	0	0	0	8.45429	8.45429	8.45429	8.45429
Tubulation of cells	0	0	0	0	0	0	0	0	8.44396	8.44396	8.44396	8.44396	0	0	0	0
Liver tumor	0	0	0	0	0	0	0	0	0	0	0	0	8.42414	8.42414	8.42414	8.42414
Female genital tract cancer	0	0	0	0	0	0	0	0	0	0	0	0	8.39511	8.39511	8.39511	8.39511
Breast or pancreatic cancer	0	0	0	0	0	0	0	0	0	0	0	0	8.34652	8.34652	8.34652	8.34652
Apoptosis	0	0	0	0	0	0	0	0	0	0	0	0	8.3254	8.3254	8.3254	8.3254
Autosomal dominant amyloidosis	0	0	0	0	8.30011	8.30011	8.30011	8.30011	0	0	0	0	0	0	0	0
Antibacterial response	0	0	0	0	0	0	0	0	0	0	0	0	8.26835	8.26835	8.26835	8.26835
Recruitment of neutrophils	0	0	0	0	0	0	0	0	0	0	0	0	8.07976	8.07976	8.07976	8.07976
Liver cancer	0	0	0	0	0	0	0	0	0	0	0	0	8.07551	8.07551	8.07551	8.07551
Skin lesion	0	0	0	0	0	0	0	0	0	0	0	0	8.05212	8.05212	8.05212	8.05212
Malignant neoplasm of retroperitoneum	0	0	0	0	0	0	0	0	0	0	0	0	7.94912	7.94912	7.94912	7.94912
Malignant genitourinary solid tumor	0	0	0	0	0	0	0	0	0	0	0	0	7.92481	7.92481	7.92481	7.92481
Proliferation of vascular cells	0	0	0	0	0	0	0	0	0	0	0	0	7.92455	7.92455	7.92455	7.92455
Asthma	0	0	0	0	0	0	0	0	0	0	0	0	7.73177	7.73177	7.73177	7.73177
Skin tumor	0	0	0	0	0	0	0	0	0	0	0	0	7.7219	7.7219	7.7219	7.7219
Synthesis of eicosanoid	0	0	0	0	7.70719	7.70719	7.70719	7.70719	0	0	0	0	0	0	0	0
Recruitment of granulocytes	0	0	0	0	0	0	0	0	0	0	0	0	7.7058	7.7058	7.7058	7.7058
Accumulation of cells	0	0	0	0	0	0	0	0	0	0	0	0	7.67106	7.67106	7.67106	7.67106
Development of genital tumor	0	0	0	0	0	0	0	0	0	0	0	0	7.6585	7.6585	7.6585	7.6585
Proliferation of muscle cells	0	0	0	0	0	0	0	0	0	0	0	0	7.59494	7.59494	7.59494	7.59494
Skin cancer	0	0	0	0	0	0	0	0	0	0	0	0	7.57587	7.57587	7.57587	7.57587
Familial visceral amyloidosis, ostertag type	0	0	0	0	0	0	0	0	0	0	0	0	7.53467	7.53467	7.53467	7.53467
Aggregation of leukocytes	0	0	0	0	7.53042	7.53042	7.53042	7.53042	0	0	0	0	0	0	0	0
Congenital anomaly of skin	0	0	0	0	0	0	0	0	0	0	0	0	7.51298	7.51298	7.51298	7.51298
Hypertension	0	0	0	0	0	0	0	0	0	0	0	0	7.4883	7.4883	7.4883	7.4883
Movement of vascular endothelial cells	0	0	0	0	0	0	0	0	7.47963	7.47963	7.47963	7.47963	0	0	0	0
Invasive tumor	0	0	0	0	0	0	0	0	0	0	0	0	7.45584	7.45584	7.45584	7.45584
Malignant solid organ tumor	0	0	0	0	0	0	0	0	0	0	0	0	7.41408	7.41408	7.41408	7.41408
Esterification of lipid	0	0	0	0	7.37033	7.37033	7.37033	7.37033	0	0	0	0	0	0	0	0
Biliary tract adenocarcinoma	0	0	0	0	0	0	0	0	7.36852	7.36852	7.36852	7.36852	0	0	0	0
Phagocytosis of leukocyte cell lines	0	0	0	0	7.28435	7.28435	7.28435	7.28435	0	0	0	0	0	0	0	0
Cerebral hemorrhage	0	0	0	0	7.25245	7.25245	7.25245	7.25245	0	0	0	0	0	0	0	0
Purpura	7.13353	7.13353	7.13353	7.13353	0	0	0	0	0	0	0	0	0	0	0	0
Abnormal morphology of mesangial matrix	0	0	0	0	0	0	0	0	7.12992	7.12992	7.12992	7.12992	0	0	0	0
Formation of fibrin clot	0	0	0	0	7.12879	7.12879	7.12879	7.12879	0	0	0	0	0	0	0	0
Quantity of carbohydrate	0	0	0	0	0	0	0	0	7.11711	7.11711	7.11711	7.11711	0	0	0	0
Hepatitis B surface antigen-negative hepatitis C virus negative hepatocellular carcinoma	7.05128	7.05128	7.05128	7.05128	0	0	0	0	0	0	0	0	0	0	0	0
Familial amyloidotic polyneuropathy	0	0	0	0	0	0	0	0	7.04873	7.04873	7.04873	7.04873	0	0	0	0
Tubulation of endothelial cells	0	0	0	0	0	0	0	0	7.01436	7.01436	7.01436	7.01436	0	0	0	0
Damage of digestive system	0	0	0	0	6.98343	6.98343	6.98343	6.98343	0	0	0	0	0	0	0	0
Engulfment of antigen presenting cells	0	0	0	0	6.96049	6.96049	6.96049	6.96049	0	0	0	0	0	0	0	0
Cell movement of keratinocytes	6.94352	6.94352	6.94352	6.94352	0	0	0	0	0	0	0	0	0	0	0	0
Depressive disorder	0	0	0	0	6.90329	6.90329	6.90329	6.90329	0	0	0	0	0	0	0	0
Quantity of muscle	0	0	0	0	6.88152	6.88152	6.88152	6.88152	0	0	0	0	0	0	0	0
Immune response of macrophages	0	0	0	0	6.87607	6.87607	6.87607	6.87607	0	0	0	0	0	0	0	0
Infectivity of virus	6.83341	6.83341	6.83341	6.83341	0	0	0	0	0	0	0	0	0	0	0	0
Formation of vessel	6.82279	6.82279	6.82279	6.82279	0	0	0	0	0	0	0	0	0	0	0	0
Benign pelvic disease	0	0	0	0	0	0	0	0	6.80716	6.80716	6.80716	6.80716	0	0	0	0
Binding of mononuclear leukocytes	0	0	0	0	0	0	0	0	6.75226	6.75226	6.75226	6.75226	0	0	0	0
Esterification of cholesterol	0	0	0	0	6.73515	6.73515	6.73515	6.73515	0	0	0	0	0	0	0	0
Migration of vascular endothelial cells	0	0	0	0	0	0	0	0	6.7097	6.7097	6.7097	6.7097	0	0	0	0
Formation of blood vessel	6.6972	6.6972	6.6972	6.6972	0	0	0	0	0	0	0	0	0	0	0	0
Flux of ion	0	0	0	0	6.69131	6.69131	6.69131	6.69131	0	0	0	0	0	0	0	0
Bruising	0	0	0	0	6.65549	6.65549	6.65549	6.65549	0	0	0	0	0	0	0	0
Amyloid of cornea	0	0	0	0	6.65549	6.65549	6.65549	6.65549	0	0	0	0	0	0	0	0
Complement activation, alternative pathway	0	0	0	0	6.65549	6.65549	6.65549	6.65549	0	0	0	0	0	0	0	0
Non-valvular atrial fibrillation	0	0	0	0	6.65549	6.65549	6.65549	6.65549	0	0	0	0	0	0	0	0
Retinal artery occlusion	0	0	0	0	6.65549	6.65549	6.65549	6.65549	0	0	0	0	0	0	0	0
Synthesis of prostaglandin	0	0	0	0	6.65136	6.65136	6.65136	6.65136	0	0	0	0	0	0	0	0
Homeostasis of cholesterol	6.63113	6.63113	6.63113	6.63113	0	0	0	0	0	0	0	0	0	0	0	0
Urination disorder	0	0	0	0	6.60456	6.60456	6.60456	6.60456	0	0	0	0	0	0	0	0
Relaxation of artery	0	0	0	0	0	0	0	0	6.60216	6.60216	6.60216	6.60216	0	0	0	0
Familial tauopathy	0	0	0	0	6.59915	6.59915	6.59915	6.59915	0	0	0	0	0	0	0	0
Synthesis of cholesterol	0	0	0	0	6.58885	6.58885	6.58885	6.58885	0	0	0	0	0	0	0	0
Cell spreading of leukocytes	6.55812	6.55812	6.55812	6.55812	0	0	0	0	0	0	0	0	0	0	0	0
Binding of fibroblasts	0	0	0	0	0	0	0	0	6.55757	6.55757	6.55757	6.55757	0	0	0	0
Binding of lymphoma cell lines	0	0	0	0	0	0	0	0	6.55427	6.55427	6.55427	6.55427	0	0	0	0
Mature lymphocytic neoplasm	6.55237	6.55237	6.55237	6.55237	0	0	0	0	0	0	0	0	0	0	0	0
Abnormal morphology of kidney	0	0	0	0	0	0	0	0	6.54157	6.54157	6.54157	6.54157	0	0	0	0
Binding of lipid	0	0	0	0	6.53615	6.53615	6.53615	6.53615	0	0	0	0	0	0	0	0
Flux of inorganic cation	0	0	0	0	6.535	6.535	6.535	6.535	0	0	0	0	0	0	0	0
Morphology of vasculature	6.52308	6.52308	6.52308	6.52308	0	0	0	0	0	0	0	0	0	0	0	0
Hyperplasia of vascular smooth muscle cells	0	0	0	0	6.51801	6.51801	6.51801	6.51801	0	0	0	0	0	0	0	0
Reperfusion injury	6.49976	6.49976	6.49976	6.49976	0	0	0	0	0	0	0	0	0	0	0	0
Apoptosis of kidney cells	6.49976	6.49976	6.49976	6.49976	0	0	0	0	0	0	0	0	0	0	0	0
Malignant squamous-cell carcinoma	0	0	0	0	6.49677	6.49677	6.49677	6.49677	0	0	0	0	0	0	0	0
Neoplasia of cells	6.46258	6.46258	6.46258	6.46258	0	0	0	0	0	0	0	0	0	0	0	0
Release of lipid	0	0	0	0	6.42082	6.42082	6.42082	6.42082	0	0	0	0	0	0	0	0
Synthesis of lipid	0	0	0	0	6.41146	6.41146	6.41146	6.41146	0	0	0	0	0	0	0	0
Flux of Ca2+	0	0	0	0	6.30055	6.30055	6.30055	6.30055	0	0	0	0	0	0	0	0
Volume of vascular lesion	0	0	0	0	6.29134	6.29134	6.29134	6.29134	0	0	0	0	0	0	0	0
Retraction of fibrin clot	0	0	0	0	6.29134	6.29134	6.29134	6.29134	0	0	0	0	0	0	0	0
Posterior circulation ischemic stroke	0	0	0	0	6.29134	6.29134	6.29134	6.29134	0	0	0	0	0	0	0	0
Acute venous thromboembolism	0	0	0	0	6.29134	6.29134	6.29134	6.29134	0	0	0	0	0	0	0	0
Orthopedic injury	0	0	0	0	6.26371	6.26371	6.26371	6.26371	0	0	0	0	0	0	0	0
Secretion of protein	0	0	0	0	6.25594	6.25594	6.25594	6.25594	0	0	0	0	0	0	0	0
Cirrhosis	0	0	0	0	6.25296	6.25296	6.25296	6.25296	0	0	0	0	0	0	0	0
Autosomal recessive inborn error of metabolism	0	0	0	0	6.22845	6.22845	6.22845	6.22845	0	0	0	0	0	0	0	0
Weight loss	0	0	0	0	6.22134	6.22134	6.22134	6.22134	0	0	0	0	0	0	0	0
Secretion of triacylglycerol	0	0	0	0	6.20825	6.20825	6.20825	6.20825	0	0	0	0	0	0	0	0
Microcytic anemia	0	0	0	0	6.20825	6.20825	6.20825	6.20825	0	0	0	0	0	0	0	0
Formation of lamellipodia	0	0	0	0	6.20687	6.20687	6.20687	6.20687	0	0	0	0	0	0	0	0
Uptake of cholesterol ester	0	0	0	0	6.18712	6.18712	6.18712	6.18712	0	0	0	0	0	0	0	0
Cell spreading of sarcoma cell lines	0	0	0	0	6.18712	6.18712	6.18712	6.18712	0	0	0	0	0	0	0	0
Activation of astrocytes	0	0	0	0	6.17292	6.17292	6.17292	6.17292	0	0	0	0	0	0	0	0
Phagocytosis of antigen presenting cells	0	0	0	0	6.14277	6.14277	6.14277	6.14277	0	0	0	0	0	0	0	0
Binding of NFkB binding site	0	0	0	0	6.14219	6.14219	6.14219	6.14219	0	0	0	0	0	0	0	0
Injury of cells	0	0	0	0	6.14219	6.14219	6.14219	6.14219	0	0	0	0	0	0	0	0
Fatty lesion	0	0	0	0	6.13138	6.13138	6.13138	6.13138	0	0	0	0	0	0	0	0
Migration of fibroblasts	0	0	0	0	6.12162	6.12162	6.12162	6.12162	0	0	0	0	0	0	0	0
